# Supplementary material for: MiR-192-Mediated Positive Feedback Loop Controls the Robustness of Stress-Induced p53 Oscillations in Breast Cancer Cells
Source: PLOS journal article supplement (doi:10.1371/journal.pcbi.1004653), 2015-12-07
Supplement: S3 (10.1371/journal.pcbi.1004653.s003) [file journal.pcbi.1004653.s003]

**S1 Table. List of the 22 molecular species used in the deterministic model.**

| Species Name                 | Species Description                                   |
|------------------------------|-------------------------------------------------------|
| <i>p53</i>                   | <i>p53</i> mRNA                                       |
| <i>mdm2</i>                  | <i>mdm2</i> mRNA                                      |
| P53                          | Inactive P53 protein                                  |
| P53*                         | Active P53 protein                                    |
| MDM2                         | MDM2 protein                                          |
| <i>miRNA1</i>                | microRNA-192                                          |
| <i>mdm2</i> – <i>miRNA1</i>  | Complex of <i>mdm2</i> mRNA and <i>microRNA</i> -192  |
| <i>miRNA2</i>                | microRNA-34a                                          |
| <i>sirt1</i> – <i>miRNA2</i> | Complex of <i>sirt1</i> mRNA and <i>microRNA</i> -34a |
| <i>yy1</i> – <i>miRNA2</i>   | Complex of <i>yy1</i> mRNA and <i>microRNA</i> -34a   |
| <i>miRNA3</i>                | microRNA-29a                                          |
| <i>cdc42</i> – <i>miRNA3</i> | Complex of <i>cdc42</i> mRNA and <i>microRNA</i> -29a |
| <i>wip1</i> – <i>miRNA3</i>  | Complex of <i>wip1</i> mRNA and <i>microRNA</i> -29a  |
| <i>sirt1</i>                 | <i>sirt1</i> mRNA                                     |
| SIRT1                        | SIRT1 protein                                         |
| <i>yy1</i>                   | <i>yy1</i> mRNA                                       |
| YY1                          | YY1 protein                                           |
| <i>cdc42</i>                 | <i>cdc42</i> mRNA                                     |
| CDC42                        | CDC42 protein                                         |
| <i>wip1</i>                  | <i>wip1</i> mRNA                                      |
| WIP1                         | Wip1 protein                                          |
| ATM*                         | Active ATM monomer                                    |
