# Supplementary material for: MiR-192-Mediated Positive Feedback Loop Controls the Robustness of Stress-Induced p53 Oscillations in Breast Cancer Cells
Source: PLoS Comput Biol. 2015 Dec 7;11(12):e1004653. doi: 10.1371/journal.pcbi.1004653 (PMC4671655; doi:10.1371/journal.pcbi.1004653)
Supplement: S6 Table — (XLSX) [file pcbi.1004653.s008.xlsx]

## Sheet: miR_192
Raw Data of Experiment 1
Cell ID	F_1	F_2	F_3	F_4	F_5	F_6	F_7	F_8	F_9	F_10	F_11	F_12	F_13	F_14	F_15	F_16	F_17	F_18	F_19	F_20	F_21	F_22	F_23	F_24	F_25	F_26	F_27	F_28	F_29	F_30	F_31	F_32	F_33	F_34	F_35	F_36	F_37	F_38	F_39	F_40	F_41	F_42	F_43	F_44	F_45	F_46	F_47	F_48	F_49
4	263	263	265	265	265	266	268	268	267	269	269	270	270	270	270	269	269	267	266	265	264	263	263	263	261	263	265	264	263	262	263	262	261	261	262	262	260	259	260	259	257	257	256	257	256	255	254	255	254
5	271	273	276	274	273	270	271	269	270	269	269	269	271	272	269	269	269	273	270	271	271	274	273	270	269	269	272	273	272	269	270	269	270	272	270	270	269	269	268	266	268	270	266	266	268	268	268	268	268
6	256	258	257	257	256	259	260	260	260	261	260	262	260	261	260	259	259	260	260	259	259	258	256	256	256	256	258	258	257	255	255	254	253	253	252	253	252	252	251	253	252	252	252	253	254	253	253	254	255
7	277	279	279	278	281	282	280	279	281	281	281	282	283	283	278	280	281	279	276	277	276	278	280	279	279	280	283	280	276	275	273	273	272	271	271	272	282	285	285	288	292	292	291	288	291	290	291	293	295
8	268	269	272	272	273	272	272	270	274	274	275	275	274	275	270	271	272	274	274	274	274	274	272	271	273	271	274	273	270	270	272	270	271	269	268	268	267	268	265	266	266	266	263	262	262	263	265	263	263
9	279	279	285	280	282	281	278	281	277	278	280	277	275	276	275	274	273	275	273	277	278	275	275	276	273	271	277	274	274	270	271	271	271	269	265	266	263	263	262	263	261	260	258	260	262	261	263	263	263
10	289	290	294	294	295	299	300	298	297	296	294	295	298	295	290	291	289	289	288	285	284	284	282	278	279	278	281	279	277	276	276	274	274	277	279	274	272	269	267	264	267	264	262	265	266	265	265	264	264
11	275	276	277	279	283	284	285	287	287	286	285	285	284	286	283	281	279	280	276	278	279	278	277	277	273	272	274	277	277	276	276	274	272	271	272	270	272	274	271	270	270	272	273	274	274	274	276	275	274
12	270	270	270	271	272	273	274	274	273	273	273	275	272	273	272	272	272	274	273	272	273	271	270	269	269	271	274	272	270	268	266	264	262	262	261	261	261	261	261	260	261	261	260	263	263	264	265	268	273
13	268	265	264	265	266	266	266	267	265	266	265	267	264	268	267	264	263	263	262	262	261	261	259	258	257	259	262	263	262	262	261	262	260	258	260	259	259	261	260	261	261	262	262	262	260	260	257	259	258
14	271	275	274	274	275	275	276	281	280	279	281	282	281	282	281	276	277	278	276	273	272	271	269	269	265	267	266	263	261	261	259	260	258	257	259	259	260	257	258	258	258	257	259	259	259	259	262	259	261
15	312	313	318	312	316	316	316	317	317	315	317	319	319	320	323	320	320	325	329	329	339	337	339	334	342	334	339	332	348	341	336	334	348	333	334	328	325	329	319	321	328	313	325	315	316	320	319	322	326
16	269	269	269	271	272	274	272	273	276	278	280	280	282	284	284	281	282	283	280	280	278	276	276	273	271	269	270	266	264	262	262	261	262	259	260	261	261	260	261	262	264	266	267	269	272	271	273	273	273
17	289	295	294	294	301	304	304	300	302	306	310	317	319	316	322	319	319	320	320	320	322	316	323	326	329	325	326	330	330	339	338	332	331	334	330	337	332	329	319	325	324	321	316	320	314	312	315	310	313
18	279	279	281	285	284	282	279	277	276	276	277	279	276	277	274	273	269	270	268	266	264	265	264	265	267	267	271	272	273	275	275	276	278	279	278	279	278	279	281	276	275	274	274	273	270	268	268	267	269
20	269	271	268	269	270	271	273	275	275	275	276	277	276	277	275	273	272	274	272	270	266	264	261	261	262	262	265	265	264	263	262	261	261	263	262	261	261	261	262	264	263	264	263	267	266	268	267	266	267
21	280	278	285	284	283	287	286	287	282	288	282	284	282	282	282	281	283	283	281	281	279	281	283	282	284	283	286	284	284	285	284	284	283	284	282	281	279	278	277	280	278	278	280	283	284	284	283	285	284
22	276	278	276	275	276	278	278	277	277	277	295	284	281	282	280	278	278	279	280	277	279	281	279	279	277	277	282	280	281	281	280	284	280	280	281	284	280	279	278	281	282	279	278	276	276	278	279	278	277
23	289	289	289	291	292	292	294	294	297	297	293	297	293	327	305	303	300	321	327	327	330	299	296	294	292	293	296	298	296	295	293	296	294	296	293	287	289	290	288	288	286	285	287	285	284	286	286	282	287
24	278	283	283	282	283	280	282	279	281	281	280	281	282	281	283	271	278	278	276	275	274	273	271	271	265	268	270	270	270	268	271	269	269	267	266	270	271	273	273	278	281	279	277	278	277	275	274	271	271
25	271	273	272	270	273	275	274	275	276	274	278	284	283	283	277	278	281	283	278	281	278	277	273	273	273	270	275	271	269	268	268	268	271	271	265	265	268	266	272	269	271	267	266	264	263	263	264	264	261
26	276	277	277	275	276	281	284	283	282	280	280	280	279	281	280	279	279	280	281	280	280	281	284	283	285	283	287	285	285	282	286	283	283	281	282	283	282	280	279	284	285	282	281	280	278	276	276	276	275
27	267	267	267	267	266	266	266	267	267	268	265	266	265	268	266	267	266	269	269	268	267	268	267	266	266	266	269	270	268	269	270	269	270	267	268	270	269	268	268	268	267	267	267	267	266	266	264	263	264
28	292	289	291	289	288	290	290	291	293	292	291	296	294	292	297	296	295	296	294	291	287	288	287	290	286	287	286	287	287	286	287	283	284	283	282	281	280	276	274	273	274	273	271	272	271	270	270	271	272
29	272	273	277	275	272	270	270	269	269	268	269	270	271	273	269	269	269	273	270	271	271	274	273	269	269	269	271	271	271	270	272	270	271	272	270	270	269	270	269	267	269	271	266	267	268	268	269	269	269
30	271	272	273	273	274	273	275	274	276	274	276	279	278	280	279	279	276	281	280	280	281	283	282	282	285	286	288	288	289	285	290	289	288	285	287	285	284	286	283	284	282	281	278	281	283	281	279	280	276
32	284	288	288	287	292	293	294	298	296	297	306	305	305	308	312	312	305	305	305	302	297	293	295	298	301	299	302	303	302	303	300	302	303	302	302	301	302	297	299	292	294	293	293	291	289	289	288	287	285
33	275	278	279	280	279	279	278	280	280	281	280	287	286	287	286	287	289	290	287	288	285	279	278	278	276	276	278	278	276	275	274	275	274	272	272	270	270	268	267	267	265	264	262	260	259	262	260	260	261
34	278	279	283	286	284	287	290	290	288	291	289	288	286	284	280	276	276	283	283	282	284	284	283	284	283	283	284	282	281	281	275	274	276	276	276	275	273	276	278	278	277	279	278	280	278	277	275	278	279
35	276	276	277	277	276	276	275	276	275	276	275	277	275	276	275	274	274	272	273	272	270	269	268	269	268	269	272	271	271	270	271	271	270	272	270	271	270	270	268	267	267	267	265	265	264	263	262	262	262
36	281	281	282	280	283	284	283	284	282	283	283	284	284	286	285	286	286	287	288	286	286	288	289	291	291	293	298	297	295	300	300	302	302	300	302	304	304	305	303	306	306	306	308	307	308	307	308	308	308
37	281	282	286	288	286	290	290	292	290	289	289	291	287	288	288	286	284	284	279	278	275	274	274	274	274	273	274	276	273	274	272	274	272	273	281	281	271	272	272	275	288	286	275	273	274	273	273	277	279
38	275	275	275	274	276	278	277	278	279	278	277	280	280	283	280	281	281	283	284	283	281	280	281	281	282	282	283	284	283	284	284	283	284	283	282	282	280	280	279	277	277	276	275	274	274	274	273	273	272
39	266	266	267	266	268	268	267	269	269	269	272	272	276	278	276	276	273	273	273	271	270	270	268	268	266	265	266	266	264	262	262	261	261	262	262	263	264	265	266	269	269	271	272	276	276	276	280	277	274
40	282	282	279	279	278	281	278	279	279	277	277	278	277	280	276	275	274	274	271	270	268	268	267	269	267	268	270	270	271	270	271	269	270	269	268	268	267	268	268	269	269	269	267	268	269	267	268	268	267
1	288	289	289	285	288	291	291	292	290	285	291	293	290	292	289	284	286	288	286	287	281	278	277	276	278	279	281	281	280	276	281	278	278	279	277	277	273	274	279	278	277	280	278	277	277	276	275	276	275
2	289	291	292	288	288	292	290	291	289	297	294	295	287	286	282	281	283	279	276	279	277	275	275	277	276	277	278	275	278	275	277	278	278	280	280	282	282	284	282	280	279	277	275	278	277	277	274	276	271
4	260	259	258	258	262	263	264	262	264	266	268	270	270	269	268	268	268	268	269	271	272	271	270	270	267	268	270	267	268	267	264	263	264	262	266	262	262	262	262	260	260	259	259	260	262	261	262	264	262
5	290	287	288	288	286	284	285	285	285	282	282	283	281	284	278	281	277	280	282	280	281	282	281	278	279	281	282	281	282	283	281	281	282	278	279	279	279	281	277	281	279	279	281	281	282	280	280	280	282
6	282	282	284	285	286	285	287	287	286	284	286	289	287	289	285	285	284	284	280	280	277	279	277	274	275	276	275	275	274	272	271	272	271	270	267	266	264	263	263	263	262	262	263	262	262	260	260	261	261
7	278	278	278	277	278	278	279	279	278	278	279	281	279	278	277	277	274	275	274	273	273	272	270	268	268	267	271	269	268	265	267	267	266	264	263	263	263	263	266	263	262	263	264	262	262	262	261	262	262
8	273	275	276	276	275	275	274	274	274	274	275	276	275	277	275	275	275	278	277	278	278	275	276	279	279	278	280	279	277	277	276	277	277	278	280	276	276	279	275	275	272	273	270	268	268	266	265	267	266
9	274	277	277	278	280	280	280	281	284	285	286	290	296	298	298	298	299	303	302	302	300	304	309	302	304	305	305	305	305	306	303	302	302	304	303	302	298	301	305	304	308	305	308	306	308	310	309	307	311
10	285	289	292	294	290	296	297	297	297	296	297	296	296	297	296	295	295	296	293	293	292	294	290	288	292	291	291	290	289	288	287	287	286	285	284	282	281	282	279	279	280	279	279	278	276	274	275	276	274
11	257	256	257	257	258	258	258	258	258	260	260	263	262	266	265	265	264	266	265	264	263	261	260	260	259	258	261	260	258	258	257	257	256	255	257	256	256	257	257	258	259	260	261	261	262	261	260	260	259
12	268	269	271	272	274	274	276	278	277	278	280	282	282	282	282	281	282	282	281	279	280	281	281	282	278	278	280	278	277	278	277	276	276	275	275	273	272	270	270	268	268	269	266	265	263	263	260	259	259
13	274	273	271	271	272	272	270	270	270	271	269	269	268	268	268	268	266	266	263	262	262	262	263	262	260	263	265	264	265	265	265	267	265	265	266	266	265	265	263	265	264	264	264	263	262	261	261	261	260
14	261	262	264	265	267	267	267	269	270	270	271	274	272	273	272	270	269	269	268	269	267	265	265	262	262	261	264	263	261	261	260	260	259	258	258	257	256	256	257	255	254	255	253	253	253	253	252	252	252
15	272	273	272	273	273	272	272	271	272	271	269	273	271	271	271	270	269	270	269	267	267	267	267	265	265	265	267	267	266	267	267	266	265	264	264	264	263	263	262	262	262	261	261	261	260	260	261	260	260
16	270	272	275	279	275	277	278	279	283	280	282	284	281	282	279	280	278	279	280	279	278	278	274	275	273	273	273	273	271	269	270	269	270	268	266	265	265	262	261	263	264	263	263	264	262	261	265	264	265
17	269	269	271	271	271	271	271	272	273	272	272	274	272	273	273	272	270	270	269	268	268	266	266	265	265	266	267	267	266	267	268	267	266	267	267	267	266	266	265	267	265	265	264	263	261	262	261	260	260
18	273	274	275	276	280	281	280	283	289	286	291	293	293	300	299	294	296	306	310	306	311	308	315	312	311	307	309	305	302	302	303	304	307	299	299	302	300	298	295	303	297	296	300	296	294	296	297	300	300
19	268	267	268	266	266	267	266	265	263	265	266	269	268	269	267	267	266	269	267	266	267	267	268	266	266	267	268	268	266	265	265	266	264	264	264	265	265	265	265	265	266	265	264	266	264	266	266	267	268
20	260	261	261	263	263	263	265	266	269	269	270	273	272	272	273	275	273	276	275	275	275	275	272	273	272	272	275	274	272	273	271	269	271	271	269	269	270	269	269	268	269	267	265	264	261	261	258	259	258
21	290	290	291	295	296	297	298	296	297	294	293	294	291	293	290	288	289	288	284	282	280	277	274	271	268	271	272	271	272	272	272	274	273	276	276	275	278	280	281	286	289	292	288	292	292	293	291	292	287
22	266	266	266	266	267	266	267	267	267	267	267	270	268	267	267	267	267	266	266	264	265	265	264	265	264	265	268	267	267	268	268	267	266	266	266	266	264	264	264	264	263	262	262	262	261	261	261	261	260
23	270	269	270	270	270	269	269	268	268	266	265	265	264	265	264	265	263	265	265	263	263	264	261	261	261	261	265	264	263	263	262	261	260	260	261	261	261	260	261	261	261	261	261	263	262	262	262	260	260
24	293	297	303	304	304	307	310	310	314	316	319	320	317	317	323	321	325	327	327	329	324	320	324	320	315	322	321	319	317	315	312	311	309	312	311	303	305	303	302	302	301	300	298	299	297	299	299	296	292
25	269	271	274	276	277	277	278	279	279	280	281	284	282	282	280	280	278	281	280	279	276	278	276	274	274	274	273	270	269	267	267	264	262	261	261	260	259	258	258	259	259	261	262	262	265	264	263	262	266
27	287	282	286	283	283	286	292	296	293	289	289	287	292	294	294	291	290	286	284	286	284	285	284	288	286	285	288	287	290	289	287	290	291	291	289	289	291	289	283	286	289	286	288	289	290	290	285	289	294
28	276	276	278	279	279	280	282	283	283	284	281	284	281	282	280	279	278	280	278	276	277	277	276	276	278	278	280	280	281	281	281	280	281	280	281	283	279	280	282	281	280	277	275	277	274	275	276	273	275
29	277	277	281	282	283	284	284	285	283	283	283	283	280	282	281	277	277	278	275	275	273	273	272	272	272	274	274	274	273	272	270	274	273	271	272	271	275	276	278	279	284	288	287	290	292	286	290	293	296
30	278	277	280	281	284	285	291	295	297	293	296	297	298	298	297	298	301	301	298	297	294	294	289	288	284	282	280	278	275	277	276	274	274	274	276	274	275	281	284	284	291	295	298	300	305	305	310	306	307
31	276	277	276	276	275	276	276	279	280	278	272	273	273	276	276	274	273	272	270	270	271	269	268	267	266	266	266	264	264	265	264	263	263	262	262	263	263	262	262	261	261	261	261	260	260	260	261	261	261
32	284	282	287	286	287	287	288	288	290	289	290	292	292	291	293	292	294	292	292	292	288	293	287	281	279	279	281	281	281	280	281	280	281	285	281	281	282	285	284	286	288	288	287	289	291	290	283	286	286
33	278	278	278	281	283	283	283	285	287	286	288	288	289	290	291	289	289	288	287	287	284	282	282	279	277	278	278	277	276	275	273	273	273	272	271	271	270	271	272	273	274	276	278	277	278	279	280	279	279
34	283	285	289	292	292	294	293	294	293	292	290	290	288	288	285	282	278	278	272	270	268	269	267	267	265	265	268	268	268	267	268	269	268	266	265	267	269	268	268	268	268	268	269	267	268	267	266	266	266
36	290	290	293	293	294	291	295	295	292	293	291	294	294	296	288	291	289	286	288	285	286	285	284	285	285	286	285	287	285	292	290	287	286	287	285	285	283	283	281	280	279	277	277	276	275	275	274	273	272
37	263	264	265	266	266	269	270	270	272	273	272	274	273	275	273	273	271	274	272	272	271	271	272	271	271	272	274	274	274	274	275	275	275	275	277	277	279	280	280	281	282	280	281	281	281	279	277	277	276
38	273	274	275	274	274	275	276	275	276	277	276	277	276	276	274	274	273	274	272	272	271	271	272	270	269	269	270	270	269	270	269	269	268	267	267	267	267	266	266	266	266	265	265	264	264	264	265	264	264
39	291	294	299	303	301	303	306	310	314	317	321	321	327	327	320	321	326	321	322	319	325	326	325	324	322	321	327	327	317	325	322	321	310	307	301	300	296	296	290	292	289	284	279	277	276	274	274	273	273
40	288	287	287	291	289	287	290	290	292	295	290	293	292	290	288	283	287	287	284	282	280	283	281	276	279	278	282	281	278	279	277	276	272	270	269	268	267	267	266	265	265	265	265	266	264	266	267	267	266
1	280	282	285	287	286	290	291	291	291	291	291	293	290	292	291	291	290	290	290	288	288	288	288	287	287	290	290	288	288	287	287	287	284	284	280	280	279	278	276	274	270	269	268	265	263	260	260	260	261
2	287	291	290	288	291	288	290	289	288	287	284	287	292	292	292	294	293	293	293	292	293	292	293	290	290	291	293	291	293	292	291	291	292	291	291	289	286	285	285	283	280	285	280	277	278	274	275	269	272
3	283	282	285	283	281	276	276	276	275	275	271	271	270	274	272	274	272	271	271	269	265	266	264	267	265	266	268	266	266	269	265	265	266	263	266	265	263	263	264	261	262	262	262	263	264	264	261	263	262
4	271	271	272	272	271	271	272	272	271	272	270	273	271	271	269	268	268	269	267	268	267	268	267	265	267	267	268	268	269	268	268	269	268	268	269	268	270	271	272	272	271	273	273	273	272	269	270	270	269
5	270	271	272	273	272	272	271	272	271	272	273	272	271	273	272	272	271	274	274	273	272	272	275	274	274	278	280	279	278	277	276	278	276	277	277	276	275	275	274	275	273	274	275	275	274	271	271	271	272
6	262	263	263	263	261	264	264	264	263	264	263	266	264	265	263	263	264	265	266	266	265	267	266	267	266	266	269	268	270	269	270	270	272	272	274	280	267	266	265	265	266	267	268	267	265	259	258	256	258
7	265	265	265	265	263	264	264	263	264	265	266	269	268	271	268	267	266	268	267	267	267	269	269	266	264	266	267	267	268	267	267	267	265	266	264	266	264	265	263	264	262	262	265	264	261	260	260	260	259
8	263	264	263	263	262	263	265	265	265	265	267	269	269	270	269	269	270	271	270	272	270	270	271	269	267	266	266	265	264	260	260	260	258	259	259	259	259	257	258	259	259	258	258	261	261	260	262	260	262
9	278	278	279	276	278	278	279	278	277	276	276	279	277	278	278	280	281	281	278	277	269	270	270	270	272	272	273	278	275	279	278	279	278	279	281	282	280	284	285	280	283	287	289	288	291	291	292	292	291
11	285	280	280	280	279	281	281	282	282	283	281	282	279	279	278	270	269	270	269	268	270	271	270	271	271	273	275	274	272	272	273	272	272	272	272	272	272	272	272	273	273	272	273	273	274	276	276	277	271
13	273	273	274	275	274	274	274	276	275	275	274	273	271	271	268	266	264	265	264	264	264	263	263	263	264	265	267	267	271	269	273	274	273	275	273	273	272	272	271	273	271	270	271	273	270	269	269	267	268
14	279	282	283	284	283	284	287	286	289	287	286	290	287	288	284	282	280	279	276	271	271	272	269	269	267	269	272	274	272	269	270	271	270	274	277	276	278	281	276	282	275	273	274	273	269	268	268	267	263
15	262	263	263	263	265	263	264	264	265	264	265	267	265	266	264	265	264	265	265	265	265	265	263	263	261	262	264	263	263	263	263	262	262	263	261	262	262	262	260	260	258	257	257	257	257	257	256	255	256
16	288	288	282	283	280	279	276	275	275	275	278	279	280	281	281	280	278	279	279	279	280	283	282	280	279	280	281	285	284	286	284	286	284	286	286	286	285	285	282	283	280	281	280	280	280	281	281	281	279
17	282	286	288	289	286	282	281	285	291	294	284	289	284	284	282	280	281	283	280	278	278	278	277	275	272	274	273	275	275	270	273	274	274	274	272	273	271	270	269	270	271	272	272	274	271	270	271	270	269
19	270	271	271	271	271	271	271	270	270	269	271	270	270	271	270	269	268	268	266	267	265	265	264	261	259	259	262	260	260	258	259	258	257	257	256	255	254	255	255	258	257	256	258	258	259	259	260	260	258
22	271	274	271	272	272	275	273	273	272	273	271	273	269	269	266	263	261	266	266	261	259	258	258	257	257	257	258	258	258	257	258	258	258	258	260	259	258	258	259	259	259	259	258	259	259	259	258	258	259
24	261	262	261	260	259	260	260	261	260	260	260	261	259	260	259	258	258	259	257	256	255	256	255	254	253	254	257	256	257	257	256	257	257	258	259	260	260	261	262	262	260	262	261	261	259	258	258	258	257
25	265	265	263	262	262	263	263	264	264	262	263	264	262	264	263	262	261	261	259	258	257	256	256	256	256	256	258	258	260	260	261	260	261	264	267	267	267	269	271	271	270	270	269	268	264	260	259	257	256
26	275	275	273	277	277	279	283	280	278	278	278	279	278	280	277	277	277	282	280	278	278	276	278	277	276	277	277	277	277	275	275	273	271	273	270	268	270	268	268	269	268	267	266	265	265	263	262	263	263
28	286	287	287	288	292	291	292	290	292	290	289	299	294	299	294	293	291	292	288	291	288	288	286	286	288	284	285	286	285	285	281	279	280	280	278	279	277	277	278	277	277	278	277	278	275	278	276	275	273
29	275	275	277	276	276	276	275	274	275	272	273	275	272	273	271	271	271	273	270	270	268	267	267	266	265	266	266	265	264	265	263	263	263	261	262	261	260	261	261	260	259	261	261	260	260	260	262	261	262
30	268	268	268	269	268	268	269	269	269	264	265	267	270	270	269	271	270	272	273	272	271	272	270	269	270	272	275	274	273	272	271	271	271	271	270	270	271	269	268	271	268	267	267	268	269	267	266	266	266
31	287	285	289	288	287	287	289	292	293	293	294	297	295	295	290	294	294	295	295	295	294	295	295	291	293	294	297	295	294	290	291	291	288	285	284	286	287	285	286	284	285	284	284	282	280	283	282	283	281
34	278	277	279	281	282	282	281	282	280	278	281	279	277	277	274	273	270	271	269	268	266	267	267	266	265	265	267	268	267	269	266	268	269	267	269	268	269	269	269	271	269	271	271	271	269	268	266	266	267
36	290	293	291	294	293	292	293	291	293	288	286	284	280	281	282	282	281	282	278	279	277	277	276	274	275	276	278	277	276	275	275	275	273	273	273	271	272	271	270	271	271	272	271	269	268	268	269	268	269
39	302	304	305	307	303	304	301	301	300	299	300	302	304	308	304	303	303	308	307	307	309	307	306	307	309	312	314	315	313	310	307	307	306	303	311	303	302	301	296	301	300	296	297	292	303	300	294	293	291
40	300	297	300	299	293	295	296	293	292	296	295	301	300	302	298	292	305	307	312	312	313	316	317	316	314	319	325	325	323	324	336	322	320	317	314	309	321	317	312	313	314	315	309	309	310	308	307	305	304
Raw Data of Experiment 2
Cell ID	F_1	F_2	F_3	F_4	F_5	F_6	F_7	F_8	F_9	F_10	F_11	F_12	F_13	F_14	F_15	F_16	F_17	F_18	F_19	F_20	F_21	F_22	F_23	F_24	F_25	F_26	F_27	F_28	F_29	F_30	F_31	F_32	F_33	F_34	F_35	F_36	F_37	F_38	F_39	F_40	F_41	F_42	F_43	F_44	F_45	F_46	F_47	F_48	F_49
1	284	285	287	289	298	296	296	303	299	295	298	297	294	306	303	304	304	301	298	296	295	297	296	293	292	287	288	287	282	282	283	283	283	283	283	284	284	286	288	288	289	288	293	291	290	286	282	281	280
4	279	283	290	292	296	296	298	299	295	294	290	286	285	285	285	283	283	281	281	282	283	285	286	288	288	293	296	299	302	302	304	305	306	308	304	303	302	301	301	299	300	298	299	299	303	302	305	305	307
7	270	270	271	270	272	272	273	273	272	272	271	270	269	270	271	271	269	265	266	266	266	269	268	269	268	269	268	269	269	269	271	271	271	272	271	271	272	272	270	270	270	270	270	270	271	269	268	270	271
10	285	287	290	292	297	298	299	297	297	295	294	291	291	289	291	292	286	284	282	282	279	280	279	281	281	284	284	286	288	289	291	292	289	292	292	289	287	286	283	283	282	281	280	281	281	283	282	284	286
11	314	322	334	326	331	332	338	338	330	334	329	316	307	303	300	297	299	297	292	289	295	300	298	296	298	298	302	307	322	326	331	333	328	330	335	352	338	324	313	307	303	302	298	299	299	302	301	303	307
12	286	290	290	283	295	299	299	297	298	298	301	297	293	291	288	290	286	281	279	282	280	281	281	281	283	287	285	285	287	291	293	298	300	292	296	293	290	288	285	276	276	275	278	280	282	283	284	286	285
14	267	270	274	273	276	276	276	277	277	279	279	280	282	281	283	284	279	275	274	271	270	271	270	269	267	269	269	269	269	270	271	269	271	270	271	272	273	272	272	273	274	273	272	272	272	271	272	271	272
16	272	272	272	272	276	275	274	274	276	275	275	274	275	279	279	281	280	278	277	275	273	274	272	270	269	271	269	269	270	271	271	270	272	273	273	273	274	274	275	276	276	276	276	275	275	274	274	273	272
17	276	280	281	283	288	283	289	291	291	292	288	289	291	294	292	290	285	279	276	272	272	272	275	278	277	274	277	275	276	277	280	284	282	282	282	287	287	282	281	282	283	281	276	275	274	271	273	276	272
22	276	280	280	281	282	282	281	281	281	281	280	276	275	276	278	279	278	277	275	275	277	279	282	282	284	289	292	292	294	294	294	290	287	284	282	282	282	281	280	281	280	279	282	282	283	284	287	288	289
24	283	283	286	286	288	288	291	293	291	295	296	296	297	301	303	302	300	298	292	290	287	285	285	283	280	281	280	279	277	278	280	279	280	280	280	281	282	283	282	285	285	286	285	284	284	284	284	284	283
27	284	289	292	291	294	294	293	294	295	292	291	289	287	289	290	291	288	286	284	281	280	281	279	278	277	280	281	281	281	280	283	284	286	289	290	293	296	297	299	300	299	296	294	291	287	284	281	281	280
28	282	286	287	288	290	293	294	294	297	296	296	297	297	300	299	300	296	292	290	288	288	289	287	287	287	288	289	288	289	291	293	294	297	299	300	301	302	302	301	301	300	298	295	294	292	289	288	287	287
29	280	277	277	277	281	282	284	285	283	283	281	280	284	284	288	286	284	288	285	284	282	282	282	281	279	279	278	274	274	275	276	276	273	275	275	275	276	278	277	279	279	280	281	280	280	278	278	277	277
31	285	290	297	298	304	305	309	312	307	300	304	302	299	291	291	288	285	286	280	280	281	281	280	280	279	280	281	284	285	285	289	292	298	297	300	303	303	301	298	295	291	287	284	281	280	282	281	281	284
33	292	294	294	294	294	295	298	301	305	306	306	308	313	315	318	319	317	312	307	305	301	298	294	290	289	289	289	285	287	290	294	294	297	299	301	306	313	319	323	328	335	339	341	337	335	330	318	308	299
36	288	295	302	306	305	318	326	324	324	327	324	321	333	339	353	348	340	343	333	332	332	332	330	329	323	314	311	297	290	288	289	289	287	287	285	286	284	285	284	283	283	284	285	286	284	286	287	289	290
38	273	276	279	280	283	282	286	287	289	290	294	295	294	299	302	302	301	297	294	292	290	290	292	288	286	287	287	284	284	284	286	286	286	286	287	288	289	291	289	294	295	296	295	292	293	290	289	288	287
39	305	311	316	318	325	325	324	323	325	325	325	321	315	314	311	310	302	297	293	295	299	300	295	293	296	301	302	303	306	308	309	313	318	317	320	319	316	309	305	306	301	300	301	304	307	306	319	317	319
40	287	290	299	301	305	307	307	306	305	304	303	300	293	291	291	288	288	288	285	283	283	284	284	286	288	290	291	293	298	297	301	306	303	303	298	293	291	292	292	291	290	288	288	289	286	286	289	288	290
35	266	266	267	268	270	269	270	271	270	271	271	269	268	270	273	273	272	269	266	265	265	267	267	269	269	270	270	270	270	271	272	272	273	274	275	274	275	274	274	274	274	272	272	274	272	272	270	273	272
25	295	303	305	307	308	311	314	315	318	317	320	321	319	322	325	324	320	313	311	309	305	303	296	288	286	286	285	284	284	284	284	285	286	286	284	287	289	286	288	289	291	290	291	291	291	291	291	290	290
5	276	278	280	277	281	279	281	284	282	277	279	281	281	279	281	282	280	277	276	275	275	276	275	275	278	278	278	277	277	276	278	281	281	281	281	281	279	280	277	279	279	279	279	279	279	278	278	279	279
3	274	274	275	275	277	276	276	277	276	275	273	272	271	272	274	275	274	272	271	270	272	273	273	273	274	275	277	275	277	277	278	280	281	281	280	279	279	279	278	278	277	278	280	280	279	279	279	280	281
6	289	289	290	279	291	290	291	287	294	295	290	290	286	293	289	288	287	284	284	279	280	278	278	283	281	285	280	280	279	282	285	283	283	283	282	283	284	284	284	284	283	281	284	280	282	278	278	280	277
9	270	272	272	274	275	274	276	277	277	277	276	275	274	276	276	278	278	277	276	275	276	276	279	275	275	276	276	274	274	273	273	274	274	274	274	272	271	270	270	272	271	270	272	271	271	269	268	269	268
15	263	267	267	267	268	269	268	270	270	270	270	269	270	274	275	279	277	276	277	278	278	279	280	282	281	282	283	283	283	283	286	286	286	285	284	287	287	286	286	287	288	287	290	284	287	287	287	290	289
18	284	289	292	293	303	298	303	302	307	307	309	306	312	320	323	321	332	327	332	330	334	336	333	331	332	332	334	329	326	324	322	315	312	306	304	292	299	298	301	294	295	302	302	305	300	301	305	301	301
19	291	297	301	306	306	303	297	310	311	314	307	307	303	310	307	307	307	314	312	309	310	315	304	303	308	312	310	301	303	304	308	307	304	310	313	313	308	314	316	309	313	300	301	308	305	305	299	299	295
20	286	285	284	292	298	293	293	296	288	297	294	286	281	284	278	279	281	276	277	279	274	276	280	279	279	283	285	288	289	295	299	303	308	312	314	315	310	304	304	305	308	305	304	302	301	299	296	296	293
21	274	274	277	275	277	277	277	277	276	275	276	277	275	278	278	279	279	276	275	274	273	275	277	276	276	278	279	278	279	281	282	283	283	285	284	284	285	285	285	283	283	283	283	284	284	283	284	285	285
25	295	303	305	307	308	311	314	315	318	317	320	321	319	322	325	324	320	313	311	309	305	303	296	288	286	286	285	284	284	284	284	285	286	286	284	287	289	286	288	289	291	290	291	291	291	291	291	290	290
26	286	288	294	295	295	298	302	306	304	305	305	307	306	295	307	299	302	293	293	307	295	301	296	295	295	292	280	289	287	289	288	292	293	291	293	291	290	291	293	294	295	293	292	296	297	297	298	296	292
30	284	286	293	292	295	299	300	303	307	313	320	319	319	324	325	328	335	332	329	327	330	334	334	336	332	335	337	341	337	340	344	343	340	344	345	345	346	346	343	342	344	342	338	345	339	337	337	335	342
32	284	287	288	292	295	296	295	295	298	297	299	297	294	297	299	300	296	295	293	291	290	290	290	290	288	289	290	288	288	288	289	291	290	290	288	287	289	289	288	288	289	287	287	288	288	287	287	287	288
34	265	266	269	270	272	271	272	273	274	273	275	275	277	278	281	281	281	281	280	279	279	283	283	282	283	287	287	285	287	288	290	292	292	294	295	297	297	303	302	299	301	302	303	303	301	303	301	301	299
37	281	283	284	287	287	289	292	294	291	291	289	289	289	294	294	297	294	291	293	292	295	297	298	297	296	299	299	301	302	304	301	301	306	306	303	308	312	306	314	313	308	309	316	311	310	313	309	311	312
1	281	282	284	288	292	293	296	297	297	295	295	294	293	295	297	297	295	291	288	287	286	287	287	285	284	284	284	285	284	285	285	286	287	287	287	287	288	287	288	286	285	284	284	283	282	281	281	281	281
4	295	294	303	305	303	310	309	313	314	315	311	311	311	315	311	318	311	314	313	306	309	312	312	311	311	312	310	314	316	309	305	311	315	316	317	315	313	320	311	312	309	306	306	303	297	296	294	294	293
6	283	290	293	297	298	302	301	303	305	301	304	302	303	308	314	315	315	314	312	309	310	310	311	311	312	312	311	311	308	307	308	307	307	305	305	302	308	303	300	300	300	299	297	293	291	287	283	281	283
8	290	288	295	299	304	299	304	302	304	303	302	301	297	295	295	292	289	287	285	284	283	287	286	287	286	288	289	291	291	294	298	300	303	306	303	301	299	299	293	290	292	290	288	288	289	287	288	288	286
11	277	277	280	282	286	286	287	290	290	290	288	289	288	287	288	289	286	282	278	276	275	276	275	276	276	275	276	275	276	278	279	280	280	280	282	283	285	286	287	287	288	286	285	284	283	281	281	279	277
12	285	283	291	295	295	293	291	294	292	295	297	297	290	289	286	290	287	286	284	287	286	288	286	290	289	290	293	297	300	297	300	300	300	298	296	293	287	285	286	287	287	286	283	285	288	288	284	284	283
15	285	285	286	288	291	291	293	294	294	294	294	292	292	294	295	297	297	293	292	292	291	294	291	292	291	294	290	290	287	288	286	283	281	279	279	278	280	278	279	278	278	278	279	280	282	281	282	283	286
16	280	283	287	289	293	295	294	295	291	297	301	301	297	298	298	300	295	290	292	292	292	293	294	292	292	294	295	292	292	293	292	291	289	287	288	289	290	289	289	288	288	288	288	288	289	288	290	292	293
17	275	275	279	285	287	291	300	293	295	295	297	298	298	296	300	294	287	283	280	281	280	281	281	281	281	284	285	286	286	289	290	291	292	297	294	297	299	303	305	297	300	293	292	289	289	286	290	288	289
18	288	291	299	302	306	307	313	318	322	319	315	310	303	301	300	299	296	293	291	288	289	293	293	291	290	296	297	298	300	307	309	312	315	324	328	325	324	317	312	303	302	298	299	296	297	295	296	292	293
20	283	284	287	292	293	295	294	295	296	294	296	296	295	295	299	298	293	291	288	286	286	286	286	287	286	290	291	292	295	298	300	306	305	308	308	307	308	307	306	304	304	302	301	298	296	296	295	295	293
21	268	270	271	272	273	274	275	274	274	274	273	271	270	271	272	272	272	271	270	269	270	271	272	271	271	274	274	274	275	277	278	281	282	285	286	287	287	285	284	282	279	276	275	275	274	273	273	274	273
28	279	280	284	282	285	288	293	293	294	295	293	294	296	298	300	300	300	300	297	292	291	291	288	284	281	283	284	282	283	285	288	291	288	291	290	292	295	295	298	299	301	301	300	302	298	296	295	291	289
29	273	275	277	278	281	282	283	282	282	280	279	278	276	276	277	277	276	275	276	273	275	276	277	278	278	280	282	282	285	286	291	293	296	298	293	292	290	287	285	284	284	285	288	286	286	287	285	284	286
30	295	294	299	299	302	302	300	300	299	294	293	290	288	286	286	285	284	282	281	282	282	284	284	285	288	284	289	289	292	292	294	294	295	294	293	294	290	288	286	285	284	283	282	283	283	283	283	283	284
31	268	272	275	276	277	277	281	283	283	284	282	280	279	279	279	277	275	274	274	273	276	276	276	279	277	280	283	279	281	282	283	284	286	286	286	285	282	282	280	277	278	276	276	276	276	276	275	275	276
32	270	272	274	276	276	278	276	279	280	280	279	279	279	281	286	284	284	282	282	282	280	278	279	279	279	280	278	276	276	277	278	279	278	278	277	278	280	282	281	282	284	284	285	287	290	291	292	289	290
33	277	280	285	290	294	295	299	300	299	297	301	302	296	296	291	288	289	282	279	281	281	281	284	283	283	284	284	283	286	289	291	292	296	302	303	301	299	294	287	282	282	281	281	281	280	279	281	280	280
37	277	276	277	281	283	283	287	292	287	293	288	284	286	286	286	287	285	282	283	282	280	282	282	281	282	284	283	282	283	283	284	285	287	288	287	287	288	290	290	294	297	293	291	292	288	285	284	286	285
40	280	285	289	289	291	286	291	291	295	295	291	293	291	299	289	304	299	301	297	296	297	304	303	304	307	312	311	307	307	308	311	315	315	314	320	320	321	321	321	318	320	316	316	309	311	305	304	304	305
5	265	266	266	267	269	268	268	268	269	269	270	269	269	271	273	276	275	272	270	269	268	270	270	271	271	272	272	272	273	273	276	276	277	278	279	280	280	281	282	283	282	279	279	280	278	276	275	274	274
7	284	284	288	290	290	288	288	290	284	283	283	282	281	280	281	284	283	281	280	278	276	280	281	281	281	284	283	280	281	281	283	282	284	285	282	282	282	283	282	281	279	280	279	278	280	279	277	278	279
9	282	282	283	284	285	286	289	287	286	287	287	287	293	288	291	293	292	292	291	288	289	288	287	286	286	286	287	284	285	287	286	286	288	288	292	292	292	293	295	297	299	298	297	296	295	293	289	288	286
14	286	290	292	294	296	295	298	300	302	298	293	294	289	291	290	289	287	286	281	278	282	284	280	281	284	286	285	287	286	291	293	293	294	294	290	289	289	288	284	285	284	280	278	279	277	276	276	276	276
22	277	279	282	284	285	286	286	288	286	286	282	281	280	282	284	284	283	281	279	278	280	280	282	285	282	285	284	284	285	288	289	290	292	290	290	289	286	283	283	283	285	284	285	283	283	282	283	282	282
23	269	270	272	273	276	276	277	276	276	276	276	278	276	280	282	284	282	280	277	276	275	275	275	275	275	275	275	275	274	275	276	277	277	277	278	278	277	278	278	277	277	276	275	275	274	274	274	275	275
24	270	272	274	275	276	277	278	277	276	275	274	272	271	273	275	276	275	273	273	272	272	272	273	273	273	274	275	275	274	275	276	276	275	274	275	275	276	276	276	276	276	275	276	276	275	275	275	276	275
27	271	272	274	275	276	275	277	277	277	276	276	277	274	277	279	280	280	279	278	276	277	278	280	280	281	282	283	280	280	280	281	281	280	280	279	280	281	281	280	280	281	280	280	280	281	282	282	282	282
34	283	283	288	289	291	293	296	295	298	299	299	301	297	303	303	305	303	301	300	294	296	296	296	295	296	302	302	301	299	298	298	295	292	289	287	286	285	284	283	282	282	281	282	282	282	283	284	285	287
35	272	274	277	277	276	279	278	280	281	280	279	279	281	281	283	282	282	280	277	280	279	279	281	283	282	285	288	285	286	287	291	290	288	288	288	284	286	283	283	282	282	281	282	280	280	279	279	278	279
36	272	275	278	279	280	284	287	286	287	285	282	284	283	284	285	285	288	282	284	285	284	284	283	283	283	284	285	284	283	282	283	283	284	285	286	283	283	284	283	282	284	284	283	282	281	279	280	280	281
37	277	276	277	281	283	283	287	292	287	293	288	284	286	286	286	287	285	282	283	282	280	282	282	281	282	284	283	282	283	283	284	285	287	288	287	287	288	290	290	294	297	293	291	292	288	285	284	286	285
38	272	274	277	277	276	282	283	281	282	281	282	282	283	281	284	284	282	281	277	279	279	279	281	283	282	285	289	287	286	288	292	289	288	287	287	284	286	284	283	281	281	280	281	280	280	279	278	278	279
39	273	274	277	277	279	281	279	280	280	280	278	279	280	283	285	283	281	278	277	279	275	283	282	280	281	285	281	281	283	282	285	285	288	284	284	284	283	287	286	287	289	289	284	281	281	278	281	279	278
2	268	272	276	278	280	279	280	279	279	277	276	276	274	276	277	276	274	271	268	266	267	269	269	269	268	269	269	269	270	271	271	270	271	273	272	273	274	273	273	273	272	271	270	271	269	269	267	269	269
3	276	280	282	283	286	286	288	287	288	290	292	291	290	291	293	296	293	293	288	293	292	294	291	289	283	284	285	282	283	284	283	285	284	283	282	280	281	283	282	283	284	284	283	283	286	286	287	286	285
4	283	284	288	289	290	291	290	293	293	292	291	292	291	294	294	297	294	289	288	282	282	282	282	281	282	284	284	284	285	285	288	290	290	293	293	293	293	294	296	296	295	294	293	291	289	286	284	282	282
11	282	284	287	289	296	295	293	298	296	290	289	286	285	292	293	293	292	289	288	287	287	283	285	285	283	282	286	285	287	286	290	293	292	293	292	289	286	288	285	283	282	282	281	281	281	281	280	281	279
12	272	277	280	283	286	288	290	292	296	298	295	293	292	288	289	286	284	279	280	278	281	283	281	281	285	286	293	296	300	301	308	311	310	308	311	308	308	300	296	295	293	292	290	290	292	291	290	291	290
13	295	299	304	309	314	316	312	314	318	318	316	315	311	310	305	305	296	289	286	282	282	283	282	281	281	283	283	286	286	286	289	292	295	296	297	300	303	304	302	303	299	295	289	286	283	281	280	279	279
16	267	271	273	277	279	280	280	279	281	279	277	271	268	269	271	271	270	270	269	267	269	269	270	270	271	272	272	271	271	272	277	278	280	282	283	282	283	283	284	282	281	278	274	275	273	273	274	274	276
18	267	268	270	273	274	275	276	278	278	279	276	275	273	274	276	277	276	274	273	272	274	274	277	278	278	282	286	287	293	295	299	299	300	296	290	282	281	280	279	280	279	280	279	279	280	278	279	280	280
23	286	288	295	296	303	303	301	301	299	291	289	283	286	286	285	289	286	283	282	282	285	284	285	286	286	292	292	293	295	290	294	295	296	295	294	295	297	295	291	290	289	290	287	287	286	289	288	286	287
26	278	281	286	290	292	294	296	295	296	292	287	284	281	281	285	286	283	280	276	276	278	278	277	276	278	279	282	279	278	281	283	283	283	284	289	291	287	285	287	286	284	287	285	284	283	283	282	284	287
27	264	267	268	269	271	270	271	271	270	271	272	270	269	272	274	273	272	272	268	267	269	269	269	269	271	273	275	277	279	284	288	292	294	293	295	294	294	292	289	285	282	280	279	279	278	278	277	278	280
28	274	278	282	281	284	289	292	288	290	292	294	288	293	290	291	291	287	282	277	274	276	273	273	275	272	274	275	273	273	274	276	276	276	277	278	280	280	282	280	284	283	282	283	281	279	277	275	275	273
29	265	264	266	266	267	266	266	269	269	267	266	267	268	272	273	275	275	273	271	270	271	271	272	271	273	275	274	275	275	277	280	283	286	288	290	294	299	302	303	304	306	308	304	304	301	297	294	289	286
34	262	264	266	268	268	267	269	268	269	268	267	268	267	269	271	271	270	268	267	265	267	267	267	270	269	271	272	271	271	272	272	273	273	274	274	275	275	275	275	274	275	273	273	272	271	271	271	271	271
35	263	265	268	269	272	272	273	273	272	274	272	275	272	272	273	274	273	272	268	269	271	272	273	270	268	270	274	274	274	277	277	278	278	282	279	281	280	279	278	277	274	272	270	274	273	272	272	273	271
1	267	269	270	273	273	274	275	275	276	275	278	279	277	282	283	285	281	279	278	278	278	280	280	279	277	282	281	280	281	279	283	283	284	285	285	286	286	285	286	285	283	283	281	280	278	278	278	278	278
5	257	256	256	258	259	259	259	258	259	259	258	260	257	261	263	264	263	263	262	260	262	263	265	265	265	267	269	269	270	271	272	273	271	269	266	265	264	264	264	264	264	263	263	264	264	263	263	264	264
6	265	266	268	268	270	271	274	272	273	272	271	268	266	266	268	270	269	268	266	266	268	269	268	268	268	272	273	274	276	279	282	283	283	282	280	280	280	277	275	275	275	275	275	276	274	274	276	275	275
7	272	275	276	279	280	279	280	277	278	277	277	279	278	282	283	283	283	282	280	277	280	282	282	281	282	284	281	283	281	282	283	283	285	284	286	286	289	288	288	291	293	293	292	289	291	291	289	291	290
8	275	279	280	282	282	281	280	279	280	279	279	278	275	280	279	279	278	279	280	278	280	282	283	285	283	283	287	286	287	282	280	277	277	284	285	286	286	285	286	285	286	285	285	287	287	286	287	292	291
10	262	262	264	266	267	267	267	268	267	269	272	275	270	272	274	274	272	270	269	264	266	272	271	270	269	269	270	271	271	273	278	279	279	278	274	275	274	270	273	273	273	271	274	273	273	273	273	274	274
14	272	276	277	278	277	278	280	282	282	280	279	278	274	278	279	279	280	280	277	273	274	274	275	278	278	280	282	280	283	284	286	286	287	288	286	284	283	280	279	277	277	278	277	278	276	277	277	275	276
21	268	269	272	273	274	272	274	274	277	276	277	276	277	279	282	283	280	278	278	277	277	278	278	278	277	279	279	277	276	276	277	277	276	277	277	276	277	276	277	277	277	276	276	276	275	276	276	276	276
24	273	275	279	280	282	283	283	285	285	284	281	282	278	277	277	279	277	276	273	271	275	275	274	278	278	276	278	276	274	275	275	277	279	279	279	279	283	282	285	281	282	282	285	293	292	284	281	278	279
30	270	272	273	275	278	280	280	279	281	281	282	281	281	283	287	286	283	282	282	277	279	279	280	282	281	283	284	282	281	279	290	288	290	286	293	286	292	297	296	293	290	291	288	286	282	279	280	280	277
31	261	263	264	266	268	267	269	270	270	272	272	271	271	274	276	280	281	279	278	279	283	285	290	292	295	299	299	297	297	295	294	293	292	290	289	290	288	284	280	279	276	274	274	275	274	271	272	273	272
32	257	260	260	261	262	261	263	263	264	264	264	263	263	265	267	269	267	265	263	264	266	266	266	265	265	267	268	268	268	267	268	269	269	270	270	270	272	272	272	273	272	275	274	277	277	276	276	275	276
38	307	308	310	317	318	312	324	328	317	314	308	308	314	327	319	314	317	319	316	315	300	330	326	326	320	323	322	321	318	311	315	310	314	319	310	319	313	322	315	309	316	312	311	308	306	322	312	306	305
40	259	260	261	264	265	265	266	268	267	266	267	267	266	268	269	268	267	264	262	262	263	263	263	263	263	266	266	264	264	265	267	268	268	269	269	270	270	270	270	270	270	269	269	268	268	267	266	266	266
[truncated: 74 more columns]

## Sheet: miR_34a
Raw Data of Experiment 1
Cell ID	F_1	F_2	F_3	F_4	F_5	F_6	F_7	F_8	F_9	F_10	F_11	F_12	F_13	F_14	F_15	F_16	F_17	F_18	F_19	F_20	F_21	F_22	F_23	F_24	F_25	F_26	F_27	F_28	F_29	F_30	F_31	F_32	F_33	F_34	F_35	F_36	F_37	F_38	F_39	F_40	F_41	F_42	F_43	F_44	F_45	F_46	F_47	F_48	F_49
2	352	358	358	356	357	359	360	359	358	359	358	358	356	356	354	353	352	351	351	350	348	346	344	343	342	340	341	340	339	337	336	335	334	333	332	330	329	331	330	330	330	330	330	330	333	332	333	334	334
3	352	357	359	359	362	369	370	372	373	373	374	373	371	369	368	364	358	355	353	351	347	346	346	345	344	343	343	341	341	342	344	344	344	344	345	347	349	351	351	353	351	350	346	344	343	342	343	340	338
4	349	352	351	352	352	357	360	358	358	359	359	362	362	363	365	367	368	365	369	371	371	372	374	374	370	369	369	365	361	358	354	348	345	340	335	333	334	333	333	334	334	332	330	330	330	332	333	331	332
5	352	358	359	360	366	370	374	372	372	372	375	374	378	377	376	377	376	375	374	373	371	367	364	362	361	358	357	352	347	344	341	339	340	338	339	338	337	337	338	338	338	338	337	340	342	343	345	344	344
8	369	376	379	380	377	381	381	383	384	382	390	390	395	392	392	394	395	385	393	395	391	385	380	387	385	377	380	378	371	377	375	371	369	364	357	359	360	361	351	354	352	347	347	348	349	352	356	354	359
9	344	349	351	348	349	353	352	354	352	354	353	355	353	355	354	354	354	354	355	352	351	350	349	347	349	347	349	348	347	345	345	344	343	340	340	339	337	336	336	336	334	334	333	332	332	333	332	330	330
13	338	342	343	342	344	346	347	347	346	350	349	350	352	353	353	353	351	351	349	347	345	343	338	335	332	331	333	333	331	329	331	330	329	329	327	328	327	329	331	330	331	332	333	333	335	335	336	332	330
16	341	345	345	346	346	353	352	351	349	352	355	354	354	354	354	352	350	348	348	348	346	345	342	342	338	337	341	339	337	335	335	335	335	334	336	332	335	334	335	336	337	337	337	338	336	340	341	340	339
19	349	352	352	356	360	362	364	364	363	363	367	367	366	367	366	358	364	363	357	354	355	352	344	342	341	341	340	339	337	338	339	339	341	342	338	343	343	347	349	349	353	355	354	354	356	356	357	350	350
20	342	345	345	345	345	347	347	347	346	348	347	348	348	346	346	344	343	343	342	341	340	338	336	332	332	334	333	333	333	333	332	331	331	331	331	331	331	332	333	333	332	332	333	333	334	334	331	330	330
23	369	375	378	378	381	387	388	387	393	394	395	395	397	395	393	392	389	382	381	383	378	371	369	367	362	360	358	355	350	349	347	346	344	343	343	341	342	343	342	343	343	343	341	344	343	345	345	345	344
25	359	363	365	366	367	368	369	368	365	367	366	365	366	366	364	364	363	363	364	363	355	354	350	352	351	347	348	344	345	344	344	344	343	341	341	340	342	343	344	345	346	348	347	349	350	350	350	347	343
26	363	372	371	370	373	380	379	382	383	383	385	385	391	392	389	386	382	381	381	380	379	375	369	367	365	364	363	361	360	357	352	356	356	352	353	350	350	352	351	350	349	349	347	351	350	347	348	346	344
28	359	359	360	357	356	358	360	359	361	363	361	361	359	358	356	354	352	350	348	348	347	344	343	343	344	344	344	344	343	343	347	347	352	351	356	353	357	361	362	360	359	358	352	351	350	347	344	342	340
29	357	363	365	364	365	371	371	372	373	373	373	373	370	367	362	355	351	350	348	346	344	342	341	340	340	342	342	341	341	338	339	339	339	340	342	342	343	346	346	346	347	347	345	346	345	345	342	340	338
30	352	356	357	357	358	360	362	362	362	360	361	361	362	362	361	362	363	362	362	362	360	359	358	357	356	353	355	351	347	345	343	341	342	338	337	336	336	337	337	337	336	336	336	337	341	342	341	342	341
31	359	361	363	363	364	368	369	369	369	372	373	372	369	368	367	365	363	361	360	358	355	352	349	348	347	346	346	343	344	342	342	342	342	340	339	339	340	342	342	343	342	343	343	345	346	346	345	343	339
32	358	363	366	365	369	372	372	372	371	371	371	371	370	369	370	370	367	370	368	366	367	365	364	363	363	364	363	364	362	359	360	360	359	356	352	351	349	347	346	345	341	339	337	339	341	340	340	341	340
33	359	359	363	361	361	365	366	369	368	367	365	364	361	362	361	360	357	356	354	352	351	348	346	344	347	348	349	349	349	350	355	354	355	356	354	354	358	354	357	354	352	350	349	347	348	347	342	340	339
34	356	357	358	360	359	362	363	362	363	364	365	366	367	369	369	367	370	373	372	373	370	368	366	369	367	369	367	367	364	362	364	363	363	359	357	357	357	355	354	352	350	348	346	345	346	344	342	341	339
35	362	366	368	367	368	372	376	372	372	374	371	372	372	372	369	372	373	370	375	373	373	371	368	366	364	364	366	364	362	360	364	364	365	363	364	360	360	359	358	357	358	355	354	355	353	353	353	350	346
36	361	360	361	362	361	365	365	367	365	363	366	363	362	363	363	360	360	359	357	351	350	350	344	346	343	345	343	346	344	343	345	344	345	347	345	345	349	353	351	355	356	351	350	349	349	347	344	341	338
39	345	348	350	350	349	353	357	355	353	352	352	351	350	349	348	347	344	343	341	341	339	338	336	335	336	336	336	336	335	334	337	339	341	341	342	344	345	347	346	347	345	346	344	343	345	346	346	343	339
40	348	349	349	346	348	350	349	349	345	346	348	348	348	348	348	349	348	349	346	345	344	345	341	342	340	339	338	338	337	334	336	336	336	339	335	336	334	334	333	333	332	332	333	335	337	336	337	337	337
1	343	348	348	347	348	353	354	352	350	353	357	357	356	354	354	358	356	355	356	357	357	353	351	351	355	348	347	348	344	345	342	341	340	341	338	337	333	334	335	336	333	333	330	331	333	332	335	334	331
6	347	351	352	351	353	357	353	357	352	350	348	350	346	345	347	345	343	341	339	338	336	335	333	333	331	331	332	333	331	329	328	328	329	328	328	327	326	327	328	328	328	327	326	327	326	327	328	327	325
7	346	350	350	350	351	355	354	353	352	350	349	348	345	344	342	341	341	341	340	341	338	340	338	338	339	339	341	341	340	341	343	343	344	340	338	335	334	334	335	333	333	331	330	332	333	332	332	331	332
10	369	375	376	377	380	385	386	386	386	388	385	382	377	376	367	359	356	352	351	349	347	346	348	346	345	345	346	346	344	344	344	346	345	348	343	345	343	346	347	348	346	346	346	345	347	342	342	340	336
12	352	357	357	358	359	365	371	374	378	377	378	380	382	383	379	380	380	382	387	385	382	383	374	373	371	368	370	368	365	365	365	363	360	360	361	358	358	358	356	359	359	354	355	353	356	355	355	358	354
14	353	354	358	357	358	360	362	365	364	366	367	368	367	371	367	369	365	365	365	361	359	363	358	357	356	354	354	356	354	353	350	350	349	348	347	348	347	347	346	347	345	343	342	340	340	341	340	340	337
15	344	347	349	349	348	353	353	353	353	351	352	353	352	350	350	349	348	345	346	344	343	340	337	337	334	333	336	337	339	337	335	335	334	333	333	331	331	333	333	332	332	332	330	330	332	331	333	331	329
18	347	349	349	348	350	351	351	348	348	345	347	346	346	344	346	345	343	345	344	342	341	338	336	336	337	336	338	337	335	335	335	334	335	332	332	333	333	334	333	333	331	332	332	331	332	332	331	330	329
21	360	364	365	364	364	369	369	367	369	369	368	368	368	366	364	364	366	362	363	362	360	361	358	359	360	357	358	359	354	351	352	349	352	349	348	345	345	346	346	346	342	342	342	341	342	344	342	344	342
22	347	350	347	345	348	353	353	351	350	350	350	349	347	346	347	349	348	346	347	348	346	346	345	342	343	343	344	342	340	338	337	338	339	336	337	335	336	336	337	336	334	333	332	332	333	332	332	332	331
24	361	368	365	368	366	368	369	370	370	369	366	367	365	362	361	360	359	357	356	355	353	350	351	348	346	342	343	343	342	342	340	340	339	339	338	338	339	339	340	340	339	338	338	337	339	337	338	336	335
3	346	356	354	352	351	355	355	353	352	352	350	349	349	347	346	347	345	343	344	344	344	343	343	341	341	341	338	340	339	337	338	338	340	339	339	338	336	340	337	337	337	336	333	333	333	334	333	334	333
5	332	342	341	340	339	342	341	341	341	339	341	341	340	340	339	339	338	337	337	335	334	332	329	331	329	328	328	328	328	328	328	328	329	329	329	329	330	333	334	334	335	334	333	332	332	329	329	326	324
7	338	349	347	347	344	347	345	344	344	343	343	343	342	341	339	340	339	337	336	337	336	335	334	334	333	334	332	333	334	332	332	333	335	336	336	336	337	338	339	340	339	339	337	335	336	334	333	331	331
12	339	349	348	348	347	349	349	348	347	346	346	346	345	345	346	346	347	345	347	345	346	344	344	343	341	340	337	338	339	338	337	337	338	337	339	340	340	341	342	344	344	344	344	346	348	347	346	347	343
13	342	353	355	358	359	362	364	366	366	367	367	367	366	366	366	364	362	361	359	359	356	355	351	347	346	342	340	338	337	335	335	334	333	334	332	333	332	336	334	338	339	340	341	341	345	345	346	344	342
14	336	346	347	349	351	352	352	351	352	350	346	345	342	340	338	336	336	334	337	336	336	335	334	335	334	335	335	337	337	338	341	342	342	342	344	342	341	340	337	336	334	332	331	330	332	331	331	332	330
16	352	366	359	363	365	365	364	361	367	366	370	372	372	368	370	370	372	370	375	369	372	371	371	369	368	373	370	367	360	359	362	367	366	362	359	358	359	358	353	359	355	354	352	349	349	347	347	346	343
17	338	347	346	346	346	348	349	348	348	347	348	349	350	350	352	351	353	354	354	356	357	357	357	356	356	357	357	356	357	357	355	354	354	350	348	346	345	343	342	341	339	335	332	330	330	329	328	327	326
18	354	366	366	369	371	369	366	371	371	370	369	368	369	364	364	364	364	364	363	360	359	360	358	358	357	355	352	352	351	352	350	347	350	346	346	346	346	350	351	353	357	359	361	361	367	369	370	369	368
19	346	358	359	360	358	362	364	365	365	363	363	364	363	360	360	354	348	346	347	346	345	343	342	342	346	347	346	349	351	354	358	360	363	369	369	373	369	367	361	355	350	347	340	339	339	339	338	339	339
20	353	361	364	366	370	376	376	380	382	378	378	369	366	363	366	367	363	360	355	356	354	351	353	348	348	348	350	350	347	345	348	348	350	346	347	350	347	349	350	351	350	351	350	346	346	350	349	348	345
21	385	400	401	403	406	409	412	412	417	415	419	421	415	414	412	409	408	399	398	391	387	381	376	373	367	365	362	362	363	361	361	359	359	355	353	354	357	361	362	365	363	363	363	364	368	367	368	365	365
22	349	361	359	359	356	360	361	360	359	357	356	358	358	354	354	353	353	353	351	350	348	346	345	343	344	345	343	342	341	339	337	339	340	342	342	343	343	344	346	348	350	352	353	353	352	347	343	339	336
26	346	352	354	352	351	355	356	354	350	348	351	350	347	346	344	343	341	341	339	338	338	338	339	337	337	338	336	336	337	335	334	336	336	337	336	335	335	336	335	335	333	331	329	330	331	331	331	330	329
27	350	360	363	362	364	366	369	367	367	365	366	363	363	360	360	358	356	354	353	349	347	345	343	341	342	343	341	341	343	340	341	342	341	341	339	339	340	341	340	342	340	340	341	342	344	342	342	340	338
28	342	349	348	348	349	351	351	349	350	347	347	347	346	345	345	345	347	348	346	348	344	341	340	339	339	338	337	337	337	336	337	337	335	335	333	333	334	335	334	335	335	334	333	334	335	336	335	335	334
29	341	350	351	352	352	354	355	355	353	354	354	354	353	352	352	349	350	349	347	346	345	344	343	341	339	339	338	339	338	338	339	339	341	341	341	342	343	345	344	345	344	345	343	342	343	342	341	338	336
32	354	364	366	365	364	367	366	367	365	363	361	362	360	360	359	357	354	353	352	350	350	347	344	343	341	341	340	341	340	339	339	340	339	339	337	335	337	338	338	338	337	336	336	338	339	339	340	338	338
33	351	357	361	360	363	365	370	371	370	373	377	371	369	364	361	359	354	351	348	347	345	344	344	343	342	340	341	342	340	339	341	340	341	342	341	340	342	343	344	345	344	341	337	338	337	336	336	335	334
34	348	356	358	361	361	362	365	364	363	370	366	368	366	364	365	362	363	358	358	356	355	351	345	343	344	344	343	341	341	342	341	342	339	339	338	337	338	339	338	340	340	339	338	340	340	341	341	338	335
35	346	352	352	357	353	354	356	355	351	350	353	352	351	349	349	346	347	346	343	344	340	339	336	334	334	333	331	333	332	332	332	331	332	331	330	329	330	331	331	333	333	333	332	331	335	335	334	332	331
36	339	347	349	351	352	356	358	358	357	358	358	357	355	352	351	348	344	341	339	339	338	336	336	335	335	335	335	335	335	334	335	336	338	339	340	339	341	343	343	340	339	335	331	330	331	331	329	330	328
38	340	350	350	350	348	350	351	349	348	348	349	348	348	348	347	346	345	344	344	343	342	338	337	337	335	336	335	336	334	334	334	334	335	335	335	336	338	340	341	342	343	345	346	346	347	347	347	347	346
39	344	354	355	354	353	354	355	354	353	351	350	350	348	347	346	345	344	343	343	344	342	341	341	340	338	337	337	336	337	338	338	337	338	337	336	336	336	337	336	335	335	336	334	335	336	336	335	335	334
40	341	350	349	351	351	354	355	352	353	355	354	354	352	351	351	353	353	351	353	354	354	353	352	349	345	344	341	341	341	340	338	338	336	336	333	335	335	335	334	337	336	338	336	339	341	343	343	343	344
2	343	352	350	350	348	350	349	350	349	347	347	347	346	345	343	345	343	342	344	344	343	341	341	340	340	339	338	339	338	339	338	337	338	338	337	336	336	336	336	335	334	335	334	333	334	333	333	333	333
6	335	349	353	355	361	367	375	362	355	356	357	357	358	360	362	359	359	356	355	355	355	356	352	351	351	350	346	345	347	344	342	340	342	339	338	338	337	335	334	332	331	328	326	324	326	326	325	326	323
8	359	374	377	376	376	382	378	384	381	382	379	377	377	372	368	368	364	364	364	364	360	358	357	355	354	355	353	354	351	348	348	347	346	343	344	344	341	342	339	340	340	338	338	337	337	336	335	336	337
9	352	366	364	363	362	358	363	367	369	364	362	362	358	356	354	354	354	353	351	351	350	348	347	344	344	343	341	341	339	338	338	338	338	337	336	335	335	335	334	334	335	335	334	334	336	335	337	337	336
10	347	358	357	356	356	356	359	357	358	357	355	355	354	354	353	354	353	351	353	353	354	353	353	355	353	352	355	354	355	355	354	353	354	352	352	352	352	352	352	351	352	350	351	350	352	354	354	356	354
30	347	356	355	357	355	355	355	355	352	353	356	353	353	351	348	348	347	348	349	348	346	345	344	344	343	342	342	344	341	342	341	339	338	339	338	339	339	339	338	339	338	338	335	335	337	337	336	335	334
31	354	363	366	368	367	370	369	371	370	371	371	370	370	366	364	360	355	353	352	349	348	347	346	345	343	345	345	346	347	343	347	347	346	347	346	347	348	348	347	349	347	344	340	339	340	340	340	338	337
37	347	353	357	357	356	359	356	357	354	357	360	359	361	363	359	358	357	359	361	357	359	355	353	352	353	356	354	350	354	350	351	349	346	346	343	341	340	340	339	338	336	334	334	335	336	334	335	333	331
3	343	355	355	357	357	361	357	357	357	359	361	358	358	355	355	355	352	353	355	353	352	353	347	346	345	343	344	343	343	340	339	337	337	336	335	334	335	335	335	335	336	335	334	335	337	337	339	339	336
4	344	353	352	352	350	353	354	352	350	351	352	351	352	351	348	348	348	347	348	346	344	342	340	340	339	337	338	337	339	337	337	335	335	334	333	334	334	333	334	334	334	332	331	331	332	333	333	333	332
6	345	358	358	359	363	365	361	362	361	363	366	361	362	357	359	357	353	352	351	348	345	347	341	340	340	341	338	339	338	340	339	339	342	340	338	338	340	339	342	341	341	343	342	342	344	346	343	343	344
7	354	366	368	370	372	377	376	375	377	378	376	375	375	374	373	371	369	365	366	361	358	354	355	351	349	345	343	344	345	343	343	340	339	339	341	343	345	347	348	349	351	350	348	348	347	348	348	346	342
10	341	350	352	352	352	355	352	352	352	351	352	353	357	361	358	354	357	349	345	341	340	338	335	333	333	333	333	334	335	336	334	334	335	334	334	335	338	338	340	341	339	339	337	336	337	336	334	332	329
11	341	350	349	353	351	354	354	356	355	356	350	357	362	360	363	354	360	360	361	358	358	356	350	348	347	347	344	341	343	347	347	343	343	343	345	345	347	346	350	352	350	348	349	352	351	350	350	346	343
12	361	381	384	380	379	381	379	383	377	377	378	378	383	384	374	373	373	359	364	362	359	356	356	350	342	345	345	344	344	346	347	349	348	345	346	346	345	348	352	350	355	350	349	355	352	347	345	341	338
15	349	352	353	356	354	355	352	347	353	351	350	351	355	349	348	348	346	344	342	345	342	342	340	341	342	342	339	345	347	345	346	343	344	343	340	344	345	348	343	338	337	338	337	335	341	339	342	340	334
16	349	361	363	363	359	359	359	360	358	358	359	359	358	356	357	356	357	355	355	355	352	353	354	353	353	347	344	342	336	336	336	337	337	336	337	337	338	340	340	339	337	336	339	342	342	342	342	339	341
17	340	351	351	352	351	353	353	353	352	351	349	347	345	343	341	340	339	339	338	337	338	338	336	336	335	336	335	336	338	339	340	341	343	340	339	342	342	344	344	347	342	341	338	335	334	333	333	333	330
18	338	349	349	349	349	350	348	348	347	347	347	346	345	342	341	339	339	338	340	339	338	338	342	342	342	339	342	343	341	343	346	349	352	351	347	347	348	346	343	341	340	345	339	335	335	337	340	337	335
20	359	371	372	369	371	372	373	374	374	374	373	372	369	369	367	366	365	364	363	363	361	358	353	353	348	347	347	345	345	344	343	342	343	342	342	343	345	345	346	347	347	347	346	347	348	349	346	342	340
22	360	372	377	379	384	383	381	383	382	382	380	386	382	383	379	379	375	373	374	371	370	370	364	358	357	355	352	348	349	349	348	346	348	347	348	350	350	353	355	358	358	362	360	360	364	359	355	353	352
24	371	382	384	382	387	389	387	387	388	390	390	388	380	383	384	375	383	376	378	372	366	360	361	361	356	359	358	358	360	359	364	357	360	365	362	365	363	368	367	370	369	365	364	361	359	352	354	354	351
25	343	353	355	354	354	354	351	351	351	350	350	349	349	349	348	349	349	348	348	348	347	346	344	343	342	341	340	341	341	341	342	343	345	346	347	347	349	351	351	354	354	353	351	351	350	350	348	345	342
27	364	377	384	386	394	394	395	396	396	395	393	389	382	376	369	363	358	353	352	349	348	348	346	345	344	344	344	345	344	344	345	345	346	346	344	343	344	345	346	345	347	344	344	345	346	347	346	343	340
28	366	379	381	382	385	388	389	386	387	387	386	392	392	390	389	384	377	372	368	364	359	357	353	351	350	349	348	347	348	346	348	350	350	351	351	352	354	358	360	362	364	366	364	362	360	357	352	349	345
29	346	357	358	360	361	362	362	360	361	359	358	357	356	355	352	351	350	348	348	349	348	347	346	345	345	343	342	343	341	341	340	339	340	339	337	336	336	336	335	334	334	332	331	332	332	332	332	332	331
30	341	352	353	353	354	355	355	355	354	353	351	350	349	347	348	347	345	343	344	342	342	341	338	337	336	335	335	334	334	334	334	334	334	334	332	332	332	333	332	332	331	330	330	330	330	330	330	330	327
31	347	357	359	360	355	355	357	358	355	353	356	354	353	353	349	349	348	347	349	351	349	347	346	346	343	343	343	343	344	341	342	338	338	335	335	336	336	335	335	334	335	334	334	337	339	341	342	342	343
32	342	355	354	355	357	359	356	357	356	359	361	358	358	355	356	354	351	353	354	354	353	353	347	347	345	343	344	343	342	340	339	337	337	336	335	334	333	334	334	334	336	334	334	335	337	336	338	338	336
33	341	350	351	351	352	354	352	352	352	349	355	354	359	362	358	355	356	348	344	342	339	336	334	332	332	332	331	331	335	335	335	335	336	335	335	335	337	338	340	341	339	339	338	336	337	336	334	331	329
34	351	360	361	362	364	362	363	362	360	362	364	361	363	362	363	360	361	357	359	359	357	356	356	355	353	350	352	348	350	346	346	344	343	344	342	343	344	344	345	347	351	353	354	356	359	359	360	359	361
35	348	358	361	361	364	363	363	363	364	361	362	361	362	359	359	357	356	355	352	351	349	347	344	343	342	341	340	340	341	340	340	340	341	341	340	339	339	339	340	341	340	339	338	340	342	345	347	347	349
1	345	355	354	353	353	353	353	351	351	350	348	348	349	346	346	345	346	344	344	343	342	341	339	339	338	337	336	337	340	339	339	337	338	337	336	336	336	336	336	335	336	334	333	334	335	335	334	335	333
2	345	356	357	355	354	353	352	353	353	353	352	352	352	352	352	348	348	346	347	346	344	345	343	342	342	341	343	340	340	337	337	340	338	336	339	338	338	337	337	339	337	336	335	332	333	335	334	335	333
5	364	379	380	387	380	379	382	380	372	376	379	377	375	377	381	376	376	374	377	373	379	378	376	370	369	374	373	375	378	374	371	368	370	365	360	367	361	359	357	360	359	351	348	344	345	345	346	343	342
8	342	352	356	358	357	358	361	357	357	359	360	357	353	354	353	352	351	347	352	346	343	343	345	343	340	340	339	340	340	337	342	341	342	340	338	341	342	338	339	337	336	333	330	329	332	334	332	330	329
9	374	385	386	386	388	390	387	388	389	385	385	382	379	383	385	384	380	380	381	376	379	377	374	372	369	368	368	369	367	367	367	364	365	364	363	360	362	360	361	360	359	358	355	358	361	359	357	356	354
13	353	365	366	368	364	365	367	367	367	365	364	366	368	362	361	362	357	355	352	349	344	342	341	339	339	339	338	338	339	340	338	338	341	339	339	338	339	339	339	339	340	338	336	335	335	335	334	334	332
14	335	345	344	344	342	343	343	341	342	342	340	340	338	337	338	336	336	335	335	336	334	335	334	331	332	331	330	331	331	332	331	331	331	331	331	332	331	333	334	333	334	332	331	331	330	330	329	328	327
26	355	365	366	370	370	371	372	371	373	374	375	373	372	373	368	371	368	365	365	361	363	361	357	355	352	346	345	344	342	342	343	341	341	340	340	340	341	342	342	343	342	340	341	340	341	339	341	340	337
Raw Data of Experiment 2
Cell ID	F_1	F_2	F_3	F_4	F_5	F_6	F_7	F_8	F_9	F_10	F_11	F_12	F_13	F_14	F_15	F_16	F_17	F_18	F_19	F_20	F_21	F_22	F_23	F_24	F_25	F_26	F_27	F_28	F_29	F_30	F_31	F_32	F_33	F_34	F_35	F_36	F_37	F_38	F_39	F_40	F_41	F_42	F_43	F_44	F_45	F_46	F_47	F_48	F_49
1	265	269	270	273	272	272	272	273	270	269	268	269	268	269	271	271	269	267	267	265	265	267	267	266	267	268	270	268	268	268	269	270	270	271	271	272	271	271	271	271	271	270	270	269	269	269	269	268	268
2	275	276	280	283	278	281	280	281	285	281	283	283	280	283	285	283	283	280	277	275	275	277	275	275	276	276	277	276	277	276	277	278	276	278	277	280	278	277	275	281	278	278	279	275	277	277	275	277	276
3	277	280	285	287	287	289	291	291	295	293	294	293	295	295	295	294	293	287	283	280	281	283	282	284	284	286	287	288	291	295	297	301	305	308	310	312	309	310	307	304	300	296	291	289	288	286	286	284	285
4	272	276	278	279	278	280	282	282	280	280	279	282	282	283	286	285	285	283	281	281	282	283	285	283	283	283	285	285	284	284	285	285	287	288	289	290	290	289	288	285	285	284	284	282	282	282	281	281	281
7	268	273	276	279	281	280	280	280	280	279	278	280	278	277	277	277	277	276	274	272	275	277	276	276	277	278	280	277	277	278	279	280	278	278	277	277	277	275	275	275	275	275	274	273	273	274	272	273	274
8	270	272	273	275	276	275	276	275	275	274	272	273	272	274	274	276	276	273	273	272	272	274	275	276	275	277	278	277	279	279	282	282	281	279	277	275	275	274	274	274	273	273	273	272	273	273	274	274	275
10	278	285	288	293	295	293	296	299	300	299	300	299	298	297	295	292	291	287	283	281	280	280	278	280	282	285	287	289	292	294	299	302	304	312	314	316	314	322	319	314	311	304	304	300	295	291	291	288	290
12	267	269	270	273	274	274	275	274	275	275	275	276	278	280	284	286	286	285	284	285	286	289	288	289	288	290	287	284	285	281	279	276	275	273	273	272	273	273	274	273	274	274	274	275	276	276	277	279	281
18	266	269	272	274	275	275	277	276	276	275	275	275	273	273	274	274	274	273	272	271	273	273	273	274	273	272	271	270	270	270	271	272	274	276	277	276	277	277	276	274	273	271	271	271	271	271	271	272	273
19	271	274	279	280	283	283	284	283	284	283	280	279	279	278	279	279	277	273	273	274	274	275	275	274	274	277	276	276	278	280	282	285	286	288	287	287	287	285	281	279	278	278	278	276	276	276	276	276	275
20	274	278	278	282	282	282	280	280	277	278	285	292	287	290	284	280	277	276	276	275	279	280	280	279	280	282	282	279	279	281	283	287	285	284	286	285	287	288	289	293	291	289	289	288	286	286	287	286	284
23	271	273	274	278	278	278	278	277	276	275	275	274	274	272	274	273	274	273	271	270	271	270	270	272	272	273	274	272	272	273	274	276	275	277	278	278	276	275	277	276	274	276	276	275	276	274	275	274	273
24	277	281	284	287	287	286	288	288	287	288	286	285	283	284	284	283	282	279	279	277	278	280	279	282	284	286	287	288	292	295	298	300	302	303	302	301	298	294	291	285	283	282	281	280	279	278	277	277	277
25	278	282	285	289	288	288	291	292	294	294	293	296	296	298	299	297	294	292	288	286	285	285	284	280	280	281	281	279	279	278	277	279	280	280	282	280	282	283	283	284	285	286	287	289	288	289	288	288	287
26	274	278	281	284	285	287	290	292	297	295	297	295	304	304	304	308	302	300	293	291	286	286	284	281	281	282	280	283	283	281	283	283	283	284	287	285	285	286	284	287	288	288	288	289	286	285	284	281	282
31	279	282	286	287	289	291	292	292	291	293	294	293	293	295	296	291	288	287	286	288	287	289	289	293	293	300	305	309	317	323	326	326	334	331	332	327	319	315	301	291	286	283	283	283	282	281	279	278	281
32	274	280	286	285	285	289	286	288	292	288	286	289	284	292	294	294	289	285	283	284	282	281	282	280	280	282	284	286	284	287	288	290	291	292	295	294	295	297	295	297	298	296	289	284	281	281	280	280	280
33	269	272	275	276	276	277	278	281	282	281	281	281	281	283	286	287	285	284	284	282	283	281	279	276	275	275	276	273	272	273	275	275	275	275	275	276	276	277	278	279	279	277	276	276	276	276	275	275	276
34	279	286	291	293	297	298	300	302	299	302	301	300	298	302	302	301	299	302	296	297	295	293	294	294	291	296	299	302	303	300	302	309	316	319	326	323	321	319	314	313	307	302	298	294	289	288	286	286	285
36	268	272	274	276	277	276	278	279	281	279	281	279	278	281	283	280	279	276	275	272	273	273	274	275	274	274	276	273	273	273	274	275	274	274	275	274	274	274	274	275	275	275	274	274	274	273	273	272	272
37	268	269	272	275	276	275	275	275	277	278	278	276	274	276	277	274	273	272	271	270	273	273	274	275	275	276	280	280	281	284	285	287	289	290	285	283	279	278	276	275	273	275	276	274	274	275	275	276	278
38	271	273	275	276	277	275	277	281	279	282	282	282	285	288	292	293	292	289	290	286	290	290	289	286	290	289	289	287	285	287	286	285	283	283	284	284	284	285	286	290	292	293	295	295	297	298	299	298	300
39	269	273	275	276	276	275	275	276	276	276	274	274	272	273	274	275	273	271	271	270	271	271	271	271	271	272	273	271	272	272	273	275	275	277	277	277	276	276	273	272	272	271	272	270	271	271	271	270	271
40	284	289	293	298	299	301	302	304	307	308	305	300	301	308	311	305	298	295	287	286	282	281	283	282	283	287	290	294	297	305	309	312	309	324	339	337	334	340	341	332	323	308	303	294	294	290	287	287	285
6	268	267	269	270	271	271	273	271	271	272	271	271	271	274	273	275	275	273	271	270	272	273	271	273	273	271	273	273	272	273	272	272	272	271	270	270	270	270	271	271	270	270	270	269	271	270	270	270	269
11	258	260	261	262	261	261	261	262	260	261	259	260	259	262	264	263	262	261	260	259	261	261	261	261	261	262	263	262	262	263	264	265	264	265	265	266	266	265	267	267	268	267	267	266	266	265	265	264	265
13	259	262	262	263	262	262	262	262	262	262	261	261	261	263	265	265	264	263	261	260	262	263	263	263	263	264	265	263	264	265	266	267	267	266	267	267	268	268	268	267	269	268	268	267	267	267	266	266	266
14	264	268	269	272	272	271	271	272	272	272	273	272	273	275	278	278	279	277	276	276	278	279	279	280	282	284	285	285	286	286	288	290	290	291	293	293	293	293	294	293	294	292	291	290	290	291	291	290	290
16	262	264	265	267	267	268	267	268	267	268	267	267	268	269	272	271	271	269	268	267	268	270	270	270	271	272	274	273	274	276	277	278	278	279	279	279	279	278	278	277	277	275	274	272	271	270	268	267	267
17	270	272	273	276	275	277	277	275	278	277	278	278	280	283	283	285	284	282	280	281	281	282	283	282	282	285	288	283	282	283	284	285	284	284	283	282	282	281	281	278	278	277	279	278	278	278	279	280	279
22	263	265	267	268	268	267	267	267	268	266	267	267	266	268	270	271	269	268	267	266	267	267	267	267	267	268	268	268	268	268	269	271	271	271	272	271	272	272	272	272	272	271	271	270	270	270	269	270	270
27	286	295	303	308	306	312	312	314	315	316	317	319	319	322	320	327	328	320	319	316	319	319	317	311	311	303	302	301	295	290	294	292	293	294	293	290	292	289	287	287	289	289	287	287	286	290	287	289	288
28	288	292	297	297	299	297	298	297	295	294	296	294	293	294	295	296	295	294	294	294	294	296	296	296	295	298	300	298	297	298	298	296	295	295	295	295	295	294	292	292	292	291	291	291	289	288	287	285	284
30	284	285	289	291	294	297	299	297	295	290	284	281	279	280	281	282	281	280	279	277	280	280	280	281	279	283	282	280	279	280	281	282	281	281	281	282	282	282	282	282	282	281	279	278	279	279	279	280	280
1	280	285	287	287	290	287	289	290	288	290	286	286	285	288	288	290	287	285	283	281	284	282	281	282	280	282	281	280	279	278	280	281	278	279	279	282	280	281	281	281	283	282	283	284	285	282	282	281	281
3	278	282	285	284	286	287	291	293	292	292	290	291	290	292	291	288	287	285	283	280	280	280	283	282	282	284	285	286	286	287	289	291	292	291	292	293	291	294	292	293	291	288	286	286	287	284	285	284	283
5	286	288	289	291	295	297	299	298	300	297	296	295	291	291	291	292	290	291	288	292	294	295	293	297	296	306	306	305	313	310	318	313	312	309	310	301	294	291	290	287	291	291	290	290	287	290	289	289	288
6	287	298	298	300	299	309	309	311	306	308	313	309	307	311	316	319	320	314	318	315	317	314	316	308	305	305	301	297	294	288	287	288	287	285	284	283	283	282	285	286	288	289	293	296	296	297	300	294	289
7	279	280	284	286	288	287	286	289	290	291	291	290	290	293	293	290	291	288	285	282	281	281	282	281	281	285	287	286	288	289	292	293	296	296	295	296	296	294	289	284	282	281	279	278	277	277	279	280	280
8	278	282	285	288	289	290	291	293	294	293	294	289	289	288	291	290	288	284	282	279	280	281	280	281	281	281	281	281	280	280	281	281	283	282	283	284	282	285	286	288	288	288	287	287	287	285	285	285	285
11	268	268	270	270	271	271	271	272	271	272	271	271	270	272	273	273	271	269	267	267	268	268	270	270	269	270	270	269	268	269	270	271	273	273	273	273	275	275	277	277	276	276	275	274	273	273	271	271	272
13	275	279	283	285	287	289	291	290	289	290	289	286	283	283	284	283	280	278	276	276	280	279	282	287	288	292	299	300	305	309	314	316	317	319	316	312	310	307	300	295	288	284	282	282	281	280	279	279	279
14	269	271	273	274	274	273	273	274	273	273	272	270	269	272	273	274	272	271	271	269	271	271	272	272	274	276	278	278	279	281	283	284	286	286	285	285	285	286	287	287	287	285	285	284	284	283	283	282	282
18	274	277	278	279	283	281	280	282	282	280	281	282	280	283	285	285	285	286	283	283	285	284	282	280	282	285	284	284	284	286	289	289	290	289	289	296	295	294	297	295	295	296	292	291	290	289	285	285	284
19	272	275	277	281	286	285	285	289	289	287	281	277	275	275	275	273	269	269	266	263	266	268	269	271	270	272	273	272	274	275	277	279	279	277	276	276	274	273	272	270	271	271	271	271	271	271	271	271	271
21	298	297	299	308	311	313	320	316	322	321	324	321	317	326	328	329	326	321	318	319	319	320	314	317	316	311	309	302	301	303	305	302	300	303	301	300	302	307	313	315	318	314	316	316	318	314	316	319	315
25	276	278	279	281	284	286	289	292	291	293	294	294	295	296	301	298	295	291	287	283	285	284	284	282	281	282	285	285	284	286	290	292	294	295	298	298	304	304	305	304	306	303	300	298	297	292	289	288	284
28	282	287	293	294	298	294	295	298	295	294	295	294	293	294	294	297	297	295	292	292	296	297	296	296	296	298	299	298	299	298	298	297	296	296	295	294	294	292	290	288	287	288	286	284	284	282	281	281	281
29	274	277	277	278	278	277	277	281	282	283	282	283	284	287	287	287	283	278	274	273	278	277	278	278	278	281	285	285	287	288	289	294	297	301	305	307	309	306	305	300	296	289	282	280	281	281	278	279	279
32	274	277	279	281	284	282	282	283	281	281	280	279	282	290	291	292	291	286	286	283	286	283	282	282	281	282	281	279	280	280	279	280	281	283	282	284	285	285	284	285	285	285	284	283	282	282	280	280	279
33	274	277	280	281	284	285	284	289	289	287	287	285	288	288	292	289	288	287	284	281	282	280	281	278	280	282	282	282	278	282	283	285	285	285	288	290	297	284	295	301	302	298	295	292	289	289	286	285	283
34	284	286	288	289	290	294	296	299	291	287	292	295	304	308	311	311	307	306	304	302	302	301	303	303	308	303	294	290	290	292	294	296	297	299	302	302	304	304	305	307	311	312	312	312	314	313	314	314	312
36	284	289	292	294	295	299	298	296	296	293	290	286	286	288	289	288	291	286	284	285	284	287	291	292	294	297	300	301	304	304	310	310	310	304	301	299	297	297	295	293	293	292	291	293	293	293	292	292	295
37	277	280	280	284	285	287	285	286	288	289	290	287	288	292	296	295	295	291	290	289	291	295	291	291	291	291	289	289	289	286	287	286	285	285	284	283	281	282	282	281	282	282	283	284	286	286	288	289	291
38	273	278	279	281	283	282	282	284	284	283	281	279	279	281	282	282	281	278	277	275	277	277	277	278	278	280	282	282	283	283	285	288	290	292	290	289	287	286	284	283	283	282	282	281	281	282	282	282	284
39	288	291	292	291	294	293	292	293	291	293	290	290	289	291	293	295	295	293	294	295	297	301	304	304	308	309	310	313	312	313	311	313	312	310	309	307	305	303	300	297	294	292	289	288	286	284	283	283	282
40	276	281	281	282	283	284	284	289	285	286	287	284	281	284	285	284	282	280	279	277	280	281	281	280	283	285	286	285	290	290	294	297	298	302	305	302	297	296	301	297	299	297	290	290	289	287	287	286	286
2	284	286	290	292	293	293	294	295	294	297	293	292	297	297	302	299	300	299	295	296	295	299	302	299	297	307	308	313	307	305	308	313	311	308	311	310	311	304	303	299	299	294	298	298	296	294	294	292	288
9	275	277	279	280	280	282	282	281	282	283	284	282	279	282	284	284	281	279	278	275	277	277	279	280	279	281	279	279	280	281	282	283	283	282	281	283	283	284	285	285	285	284	285	284	283	282	282	281	280
12	268	270	270	273	272	273	273	273	272	272	272	271	271	273	275	276	276	273	272	272	274	274	275	274	274	276	276	275	275	275	276	277	279	278	277	278	278	277	278	278	277	276	276	275	274	274	274	274	273
17	287	295	301	309	313	316	320	322	322	324	322	323	325	330	329	328	327	323	319	314	312	310	307	301	293	294	292	289	286	284	283	283	281	282	282	281	282	282	280	280	281	281	281	283	284	284	284	282	283
20	273	275	276	278	278	279	279	279	279	279	280	280	281	284	286	288	286	285	284	282	284	285	285	284	283	284	284	282	282	281	280	280	281	279	278	277	276	276	276	277	277	276	277	277	277	278	279	279	279
22	279	281	283	286	289	289	291	296	301	300	296	295	292	293	295	297	296	294	290	290	291	290	289	285	283	282	280	279	279	278	278	277	276	276	275	276	276	277	277	276	276	277	277	278	278	277	277	277	278
23	278	279	281	284	285	288	287	288	289	289	286	291	287	295	292	293	292	290	290	289	285	284	281	281	286	279	280	278	277	278	278	278	278	278	278	278	279	279	280	280	281	280	280	279	278	278	278	278	278
24	265	268	268	270	271	271	270	273	272	271	271	270	271	273	275	276	274	272	270	269	270	271	271	271	270	271	272	271	271	271	272	274	274	274	274	275	274	275	275	275	275	274	274	274	272	272	272	272	271
27	279	285	288	295	294	298	300	297	300	300	295	295	284	283	287	289	286	283	282	284	285	284	285	287	286	287	288	288	287	295	298	293	293	288	288	285	288	285	286	286	288	289	286	284	288	287	284	284	290
31	269	270	269	271	269	270	269	271	271	271	270	270	269	270	273	274	272	271	268	268	270	268	268	271	271	273	272	270	271	272	273	272	273	275	275	274	274	274	274	275	275	275	274	275	274	275	275	275	275
35	273	276	277	279	277	278	278	279	277	280	278	275	275	277	277	279	278	276	276	275	275	276	279	278	277	279	280	280	279	279	279	279	279	277	278	279	280	279	277	277	277	278	277	277	276	275	276	277	276
2	280	282	284	285	285	291	290	291	292	289	288	286	288	286	291	293	293	294	293	285	289	289	290	287	287	288	290	288	288	290	293	295	296	299	300	307	310	307	307	304	299	291	285	287	288	288	288	289	290
3	284	289	291	297	298	301	301	300	300	299	299	294	300	296	302	299	296	285	287	283	284	282	283	283	283	284	287	290	288	294	297	299	301	307	311	314	315	317	322	316	311	309	304	296	295	289	287	289	291
4	280	283	288	293	297	301	303	302	306	304	298	301	303	298	308	303	299	302	305	297	295	292	292	290	292	289	292	288	290	294	294	292	292	293	293	296	297	298	297	299	299	296	291	289	292	291	290	286	290
5	267	270	272	274	275	275	275	275	275	274	273	274	271	272	274	275	274	273	271	271	273	275	274	276	277	280	280	282	283	285	286	290	288	285	283	281	277	277	277	276	277	277	278	279	277	278	277	278	278
6	290	287	294	300	305	304	308	305	306	307	308	305	302	305	306	305	300	302	298	299	300	298	296	294	287	291	294	292	292	290	291	291	293	289	288	285	287	285	283	282	284	280	279	279	280	279	280	279	277
7	272	272	278	279	280	283	282	284	282	282	282	278	281	286	286	285	286	281	287	278	280	280	280	278	277	279	279	276	275	274	274	275	276	277	277	277	277	276	276	276	280	283	285	287	288	289	292	293	294
8	288	289	293	298	300	301	301	303	300	297	294	294	287	283	286	288	287	286	282	282	286	290	288	293	291	301	304	303	304	307	310	310	308	304	297	296	291	290	289	289	287	288	285	285	288	289	290	290	291
12	282	287	289	293	294	297	295	297	295	294	291	288	283	284	285	286	282	282	279	276	280	280	279	279	279	283	284	284	287	289	291	293	294	293	292	291	287	285	282	280	280	279	279	280	279	279	278	278	278
14	282	285	287	293	298	298	300	299	302	301	300	301	301	306	306	310	311	291	291	293	289	294	293	295	292	295	291	291	292	287	288	287	286	285	284	283	282	281	281	283	286	286	285	284	287	287	290	290	289
15	275	278	283	285	289	289	291	289	290	279	275	274	275	279	284	290	289	285	284	281	282	282	284	283	283	282	283	281	281	281	280	281	281	281	281	281	281	282	283	283	282	281	281	279	279	279	278	277	277
17	273	278	284	288	293	295	293	296	295	297	295	287	280	280	279	277	275	272	270	270	270	270	270	271	271	274	273	272	272	273	275	274	276	277	278	278	279	280	281	280	280	278	278	276	274	272	272	272	273
19	263	265	268	270	270	269	270	269	270	271	271	272	271	275	280	280	277	278	276	272	275	276	273	272	272	275	274	273	274	274	275	276	277	279	279	283	285	285	286	288	289	291	288	285	283	280	279	277	276
20	289	288	291	290	292	296	299	299	296	294	291	288	284	280	281	279	276	274	273	272	273	273	273	273	273	276	277	275	276	278	279	281	283	284	286	287	285	284	281	278	275	275	275	274	276	274	274	274	275
23	284	288	290	293	301	302	304	303	305	305	302	300	297	296	293	292	290	290	287	287	287	289	289	287	289	290	292	292	293	296	300	302	302	304	304	302	301	297	291	288	287	286	285	286	285	285	282	284	284
24	283	285	290	292	298	298	302	302	304	307	309	308	310	312	315	316	314	312	307	306	304	300	295	293	292	291	290	287	288	287	288	289	290	292	295	298	303	304	308	311	312	312	309	302	295	291	287	287	285
25	274	276	277	280	280	282	281	282	281	283	281	281	280	282	283	282	280	278	276	274	276	276	275	276	275	277	277	277	276	277	278	278	279	279	280	281	282	282	282	283	284	284	284	283	282	280	279	277	277
28	275	278	280	283	286	287	287	284	284	283	281	283	280	280	284	284	281	278	277	276	277	277	277	279	278	280	281	282	284	285	288	290	294	294	296	297	298	298	296	293	290	287	283	280	279	278	278	278	278
29	267	269	270	272	274	272	272	273	272	272	271	270	269	273	275	276	275	274	271	270	272	273	274	273	273	274	275	274	275	277	278	280	281	281	281	282	282	282	281	278	277	276	275	275	276	276	275	274	275
30	277	280	282	284	287	290	289	288	286	286	287	288	287	295	295	295	295	294	296	294	298	302	303	302	302	305	308	306	306	306	307	305	303	301	300	298	298	297	295	291	289	288	285	285	284	284	283	282	284
32	270	271	274	276	277	277	277	279	278	277	278	275	275	277	277	278	276	273	273	273	274	274	274	273	275	276	276	275	275	276	277	277	278	278	278	279	281	281	280	279	280	281	282	281	283	283	283	285	285
34	268	269	271	273	273	274	274	274	275	275	274	273	273	276	278	279	277	275	274	272	274	275	274	273	273	274	274	274	272	273	274	275	276	275	275	277	278	278	279	280	281	281	281	278	277	276	274	273	273
35	281	284	290	295	297	298	301	301	299	298	297	292	290	289	287	284	281	280	276	275	278	278	277	276	276	278	279	279	281	283	285	286	289	289	289	287	285	282	280	280	280	279	278	278	277	278	278	278	278
37	271	272	275	276	279	277	278	280	280	281	280	281	281	283	283	282	280	279	277	277	279	279	279	279	280	284	284	285	290	291	293	294	295	293	292	292	291	287	284	280	282	280	280	280	278	278	279	278	278
9	269	271	272	273	276	277	277	277	276	276	276	275	273	277	279	280	278	276	274	274	275	275	275	275	275	276	277	275	275	275	275	275	275	276	275	276	276	275	275	274	275	275	276	276	275	275	275	273	273
10	271	273	280	280	280	282	283	285	283	284	285	283	285	285	287	288	287	285	283	283	283	282	282	281	280	281	281	280	279	279	278	277	277	277	277	277	276	277	278	276	275	275	275	275	274	275	274	273	273
11	265	267	269	271	274	274	274	274	274	274	273	272	269	271	273	273	272	270	269	267	270	270	270	270	270	271	273	272	272	272	273	274	273	272	272	273	272	272	272	271	271	271	271	270	270	270	269	271	271
16	268	268	271	272	274	276	275	277	285	285	284	279	282	283	286	287	284	282	288	282	283	284	288	290	290	293	293	291	293	288	292	288	287	281	280	282	278	278	279	278	279	282	282	282	284	285	286	286	285
18	263	264	267	268	271	271	271	271	270	269	270	270	269	270	273	274	272	270	268	266	267	269	268	268	269	270	271	270	268	270	272	272	271	273	272	273	273	273	274	273	272	272	271	271	270	270	270	269	270
27	266	269	269	271	272	271	273	272	273	273	273	272	272	275	277	279	278	277	276	275	276	277	277	278	278	279	279	278	277	277	279	278	278	277	277	275	276	276	276	275	274	274	275	275	274	275	274	274	275
31	272	273	273	275	277	278	276	276	274	274	273	272	273	276	276	277	277	274	273	271	274	275	274	276	274	275	276	274	274	276	278	279	279	278	277	277	278	277	279	278	279	279	278	279	280	281	280	280	280
36	275	278	280	285	289	289	290	290	290	291	289	288	287	287	288	288	285	283	279	276	278	278	277	282	284	279	279	281	279	277	279	282	278	279	279	282	280	276	282	281	281	278	278	277	278	278	278	278	278
40	275	274	277	281	283	281	281	282	282	282	280	280	280	281	284	283	282	279	277	277	279	278	277	275	276	278	278	277	276	276	277	276	276	276	277	277	277	276	275	276	277	277	277	276	275	274	275	274	275
[truncated: 95 more columns]

## Sheet: miR_29a
Raw Data of Experiment 1
Cell ID	F_1	F_2	F_3	F_4	F_5	F_6	F_7	F_8	F_9	F_10	F_11	F_12	F_13	F_14	F_15	F_16	F_17	F_18	F_19	F_20	F_21	F_22	F_23	F_24	F_25	F_26	F_27	F_28	F_29	F_30	F_31	F_32	F_33	F_34	F_35	F_36	F_37	F_38	F_39	F_40	F_41	F_42	F_43	F_44	F_45	F_46	F_47	F_48	F_49
1	338	343	347	350	351	360	360	364	364	370	376	380	379	379	378	378	373	366	360	361	369	363	357	356	350	349	348	345	338	338	335	335	330	333	323	341	341	331	329	328	337	334	336	339	338	337	333	336	332
2	331	337	337	341	343	343	343	346	350	349	350	344	349	352	353	355	352	347	343	342	341	337	336	337	332	335	335	331	333	332	333	334	331	335	334	347	352	354	356	361	363	361	355	356	357	365	353	353	355
3	332	333	334	333	333	331	331	331	331	333	334	333	331	334	333	332	334	329	331	329	329	326	328	327	327	325	322	322	324	324	324	322	320	322	322	323	321	319	323	321	321	322	324	326	327	326	326	330	324
4	333	336	337	337	338	337	339	341	343	341	340	344	343	343	343	343	345	344	344	343	345	345	344	342	341	342	347	345	342	344	342	340	354	349	337	339	339	340	337	338	337	337	336	337	336	335	336	338	338
6	333	335	336	339	338	337	337	338	338	342	339	342	343	346	352	342	350	336	336	332	330	327	324	324	323	322	319	319	327	325	322	317	315	315	317	318	320	319	318	321	319	319	321	319	321	320	319	321	321
8	333	335	340	337	337	336	340	340	338	336	337	338	339	341	340	340	339	339	337	337	335	331	332	328	329	331	330	327	327	325	324	325	324	322	321	319	321	321	318	319	318	317	318	318	317	318	317	319	320
10	344	351	352	357	358	363	368	369	370	370	371	369	372	372	374	373	369	367	368	367	363	362	362	357	355	354	351	347	346	342	340	337	334	332	330	329	328	326	326	325	325	327	328	327	329	331	332	334	336
11	332	334	335	336	338	338	340	340	346	344	345	346	345	344	342	343	341	342	339	339	337	335	335	335	336	334	332	331	331	329	328	325	331	331	347	329	325	324	329	322	321	318	319	316	315	315	316	317	319
12	344	353	354	362	364	366	368	367	372	373	375	379	377	375	373	372	367	364	362	355	353	350	346	347	343	338	332	330	327	326	326	322	322	323	325	326	327	326	328	331	336	337	341	343	343	345	342	344	347
13	349	351	355	360	363	363	366	371	362	372	378	374	370	374	370	361	357	351	354	345	343	334	333	331	329	328	326	326	330	329	327	328	328	328	328	328	329	334	333	335	338	339	342	341	339	338	337	338	335
14	324	330	329	328	329	332	333	332	332	333	333	335	336	336	336	335	336	338	336	332	335	333	332	330	329	331	326	323	320	317	316	315	313	314	312	313	315	314	314	316	315	316	318	318	320	323	325	328	328
15	339	342	339	343	344	350	349	347	342	351	353	354	350	352	354	350	350	345	345	345	343	341	339	335	332	329	324	328	327	325	327	326	325	323	325	324	321	324	324	321	319	322	325	325	324	327	329	329	330
16	319	321	321	321	321	321	323	324	323	323	324	325	327	325	326	327	328	326	327	327	326	325	324	322	322	321	322	321	320	319	318	317	315	317	316	315	312	311	311	309	310	308	309	309	308	309	309	310	312
17	321	325	325	325	325	323	323	323	320	319	319	318	320	318	317	318	317	316	315	315	315	314	313	312	311	311	310	311	311	311	309	309	310	309	310	309	308	310	310	310	309	308	310	309	308	307	308	308	308
18	322	325	326	327	328	330	331	332	334	333	333	334	335	337	337	336	337	336	335	335	335	336	335	334	333	333	331	329	328	325	324	322	321	317	314	314	311	311	310	310	311	310	310	312	310	310	312	313	315
19	328	332	332	333	332	332	332	333	335	336	335	335	333	333	331	329	326	323	320	319	320	319	320	320	322	320	321	318	319	321	319	320	323	323	324	322	320	319	319	319	316	318	314	313	312	311	313	312	314
20	325	325	325	323	323	324	322	322	322	321	321	322	322	322	321	323	322	323	321	321	320	319	320	319	319	317	315	315	315	314	314	313	314	314	315	315	315	315	316	316	317	319	320	318	319	318	317	318	317
21	357	363	364	371	365	366	381	387	382	392	387	391	392	398	389	384	374	365	351	345	336	334	333	333	332	330	334	335	336	332	335	333	333	332	334	334	331	332	338	345	343	346	343	345	344	340	341	333	328
23	323	327	326	323	324	322	322	325	326	327	327	325	324	322	320	319	318	316	316	313	313	311	311	311	312	311	311	311	310	311	311	313	313	312	314	313	314	315	316	317	317	317	316	316	313	313	311	311	309
27	349	353	354	355	359	357	359	358	358	358	354	353	354	354	352	352	352	349	345	347	345	344	341	343	340	340	336	336	337	336	336	331	330	328	329	328	327	326	326	325	326	326	326	326	327	328	330	330	330
28	342	344	345	345	347	348	349	350	354	356	357	357	357	356	357	356	357	354	352	349	348	345	343	340	339	337	334	332	330	329	330	327	327	326	327	327	328	325	323	321	320	320	322	322	325	327	328	329	330
30	326	330	328	327	327	328	327	328	328	329	330	328	328	328	330	329	330	331	331	330	330	329	328	330	328	327	324	323	322	319	318	317	314	315	314	314	312	313	313	314	314	315	316	317	318	318	319	320	320
33	339	344	344	345	347	347	349	351	353	356	357	358	360	361	361	359	358	357	357	357	355	353	352	351	349	345	343	341	339	338	335	337	336	338	335	337	337	338	340	342	345	346	345	347	347	349	348	347	348
35	339	339	342	342	345	346	350	351	356	358	359	360	362	360	357	359	360	354	351	349	350	347	348	344	342	340	341	341	339	336	335	332	331	330	329	328	329	329	330	329	333	334	335	337	340	340	342	338	338
38	334	338	338	339	339	339	338	340	342	342	344	346	345	345	347	343	345	341	341	340	340	340	339	339	339	336	335	334	337	338	337	337	335	333	333	336	336	335	334	332	332	331	330	331	328	328	323	323	322
39	350	354	356	362	366	369	371	374	379	377	375	379	382	386	387	380	378	374	375	378	373	374	375	376	375	376	371	370	368	371	373	375	372	380	383	383	380	380	385	381	365	360	369	366	364	366	362	350	347
40	343	347	347	349	353	355	354	355	360	358	357	354	356	352	354	351	352	352	353	348	344	343	340	335	333	333	331	329	329	329	329	328	329	329	330	331	330	329	329	329	331	330	330	331	332	332	331	326	327
41	335	336	337	340	336	342	341	339	342	343	343	345	344	346	346	345	348	350	344	347	344	343	347	343	340	345	340	342	344	344	339	338	340	338	339	337	337	337	334	336	336	336	337	331	330	332	331	334	325
42	345	349	351	352	354	355	358	360	362	368	372	372	372	371	371	370	363	360	350	346	340	337	336	334	335	334	332	333	332	332	331	331	330	330	331	333	336	338	340	344	346	348	347	346	345	340	336	332	329
43	347	350	351	353	355	357	360	363	365	367	370	372	368	371	372	373	375	371	372	369	368	367	367	364	361	357	355	358	350	345	341	340	337	337	334	337	334	335	332	331	335	338	339	337	339	340	342	343	345
44	343	351	352	355	358	363	369	372	378	371	375	387	384	387	390	386	377	363	369	369	371	365	364	354	348	344	339	338	333	330	332	332	331	331	333	333	334	331	332	334	338	339	337	341	339	339	340	338	340
45	339	350	355	362	361	361	375	381	376	381	384	386	393	379	380	375	379	380	378	371	378	371	366	366	368	370	372	369	362	357	354	350	348	346	343	342	344	343	341	341	341	341	337	337	336	332	332	331	333
46	343	346	347	349	351	354	355	357	359	359	360	359	360	361	358	354	353	348	343	341	337	333	329	330	330	328	327	327	329	330	330	332	330	330	332	334	338	339	347	345	346	347	346	344	342	338	332	329	327
47	345	349	351	351	353	355	358	360	363	369	372	372	372	371	370	370	363	360	350	347	340	337	335	333	334	334	332	333	332	332	330	331	330	330	331	333	335	338	341	344	346	348	347	346	345	340	336	333	330
48	330	332	333	332	333	334	334	332	334	332	334	333	332	335	334	331	332	332	332	330	332	336	331	330	331	331	331	328	327	327	327	325	324	324	322	322	320	319	318	319	319	320	320	320	320	318	318	318	317
49	335	338	338	338	342	342	343	344	346	347	345	346	349	346	345	344	344	342	340	341	340	336	333	331	328	326	324	321	319	319	317	317	318	317	317	317	318	317	319	320	320	321	323	322	321	323	322	323	322
5	335	337	340	344	342	341	343	340	343	342	341	340	335	333	330	330	328	327	328	328	329	329	331	330	331	330	327	328	329	326	328	329	326	327	328	327	324	323	323	322	328	327	327	326	325	328	323	322	320
7	330	335	336	339	344	345	347	351	354	355	362	364	364	369	373	370	375	375	376	374	375	374	373	372	372	373	372	371	373	372	369	363	358	357	354	350	347	341	340	337	335	333	332	330	326	327	325	323	321
24	331	336	333	333	336	338	337	339	341	342	342	340	346	342	341	340	340	333	329	326	326	326	327	323	322	324	325	323	323	321	319	322	324	323	324	322	320	320	319	318	318	319	320	319	318	319	318	318	314
29	347	352	352	349	351	355	359	355	371	361	367	360	356	353	351	345	345	344	347	346	347	340	344	345	346	344	344	339	338	333	332	333	332	336	334	335	332	329	329	331	334	337	336	340	343	342	339	338	335
31	348	354	353	350	350	354	358	356	369	362	367	361	356	355	352	346	346	344	348	346	352	348	347	347	347	343	344	340	338	333	332	332	332	336	334	335	332	333	333	332	335	340	338	341	348	344	338	337	335
32	339	345	345	351	355	364	364	369	374	372	374	372	371	373	371	366	364	362	362	360	358	356	357	352	349	344	343	340	337	335	334	332	331	329	330	333	333	337	336	339	340	341	343	347	350	355	357	359	357
34	360	369	370	370	373	370	375	377	378	381	384	382	388	392	396	392	386	383	384	381	373	365	360	350	349	344	342	342	339	338	336	334	333	332	332	333	332	330	331	330	332	335	332	330	330	328	327	326	326
37	332	336	338	338	337	340	342	340	344	340	342	340	340	340	339	338	338	335	335	331	329	326	326	326	326	325	324	324	324	323	323	322	322	320	322	322	322	322	323	322	322	323	322	323	321	320	320	320	320
2	350	353	355	357	363	364	365	363	367	371	370	367	364	364	354	351	350	346	343	342	340	340	338	335	335	334	330	329	329	331	330	331	331	329	329	329	329	327	326	327	326	326	325	324	324	324	321	323	324
3	338	341	347	348	350	350	356	360	360	358	361	356	357	353	349	346	346	342	339	336	332	328	325	322	321	320	320	318	318	318	317	317	317	316	317	316	317	318	317	318	318	318	319	319	320	323	320	319	317
6	337	342	344	347	347	348	348	349	350	349	350	348	350	351	349	347	349	350	348	342	343	341	339	339	337	334	334	331	331	323	326	328	328	325	322	321	321	319	320	321	318	317	318	316	318	318	319	317	317
7	318	321	321	322	322	322	321	320	321	321	322	322	323	323	323	321	322	323	321	320	321	321	319	318	317	316	315	314	313	312	312	313	312	311	311	311	313	314	314	313	314	315	315	315	316	316	315	314	312
9	332	336	338	337	336	342	345	350	350	348	352	349	353	353	349	347	347	343	343	340	336	333	331	326	325	322	320	318	318	316	317	316	316	316	315	316	316	316	316	316	318	318	320	319	320	321	321	322	322
14	329	334	336	338	339	342	343	348	352	350	351	351	355	355	366	362	356	351	344	339	338	332	327	322	319	317	315	318	320	317	314	315	314	313	315	315	316	316	316	317	317	319	319	319	323	327	324	317	313
15	335	338	339	338	337	338	341	346	343	341	339	334	335	334	335	335	335	333	331	333	335	333	333	330	329	328	329	327	326	327	325	324	324	323	322	323	322	321	321	318	317	317	316	316	315	315	314	315	314
17	346	340	343	346	346	346	349	347	345	339	343	338	339	342	341	347	349	344	341	337	342	341	338	339	342	340	342	339	339	341	343	346	345	348	341	342	343	339	342	342	339	340	336	333	332	332	331	329	331
18	340	345	345	345	349	347	345	348	346	346	346	345	349	358	364	360	356	352	351	345	342	348	347	346	346	346	347	343	340	344	343	342	340	337	341	337	337	337	337	338	339	339	341	342	347	350	347	357	358
19	326	330	331	331	332	331	331	331	331	331	331	330	330	328	329	328	327	326	326	325	324	324	324	322	321	321	321	319	319	318	318	317	316	316	316	315	316	316	316	316	315	314	315	314	313	313	312	312	312
1	326	330	331	332	336	336	339	339	339	338	338	337	337	337	336	334	331	331	331	332	329	329	331	327	326	325	324	324	322	321	320	320	321	319	318	318	317	316	315	316	315	317	318	318	316	316	316	315	315
4	347	356	362	356	363	365	370	365	359	356	358	360	360	361	352	347	345	343	344	349	347	342	344	344	341	344	341	339	337	334	338	331	332	333	328	335	331	327	329	328	325	328	325	324	326	325	323	327	328
5	345	345	348	347	350	349	351	351	351	354	352	351	348	356	352	350	347	345	350	341	344	340	339	331	337	336	340	332	329	333	324	327	322	321	318	316	318	314	314	315	312	313	313	310	311	310	309	309	311
10	340	342	341	340	339	341	340	338	339	339	340	342	348	345	343	338	336	339	340	332	329	333	338	334	329	326	324	323	323	323	322	320	320	318	317	317	316	315	313	314	313	313	315	314	316	314	314	314	312
12	341	347	350	348	352	354	354	358	363	360	359	363	363	362	366	362	360	359	360	357	354	353	349	352	349	345	345	341	339	338	331	328	325	322	319	319	319	320	322	322	323	321	321	321	320	321	322	321	321
13	332	336	340	341	343	345	348	349	348	343	348	348	345	344	346	345	341	340	338	338	338	338	336	334	334	334	332	332	334	331	331	330	330	326	325	326	326	322	323	320	318	317	317	315	314	313	314	314	314
20	327	330	329	328	328	328	329	329	329	329	329	329	329	329	329	329	328	328	330	331	329	328	328	328	327	327	328	327	326	325	326	324	324	324	322	322	321	320	320	320	318	319	318	316	316	316	317	315	316
2	396	393	398	401	400	403	403	406	405	408	405	409	408	406	407	413	414	411	407	401	404	405	411	399	408	401	403	400	397	391	393	394	391	388	382	385	382	370	361	356	353	354	354	351	351	349	349	347	347
5	365	374	378	376	372	374	383	389	386	380	384	392	393	400	403	403	398	391	404	398	392	391	387	394	397	395	390	386	380	380	396	405	393	386	383	381	375	393	376	382	388	382	378	388	382	358	372	358	365
7	333	339	340	340	339	338	340	340	339	339	338	336	334	334	334	332	333	332	331	331	328	328	326	323	323	325	326	326	326	323	323	324	325	325	326	327	328	327	327	329	331	332	331	331	332	332	332	329	330
8	324	329	329	329	328	328	328	327	326	326	325	325	324	325	324	323	323	321	320	319	319	318	317	318	317	318	316	316	316	315	315	315	315	314	315	316	314	315	316	315	315	315	315	314	313	314	313	313	312
9	352	360	363	365	369	369	369	372	377	380	377	375	374	375	376	377	377	378	378	377	380	376	377	376	376	377	376	374	372	372	371	369	369	368	364	366	363	363	361	360	358	357	356	355	354	353	352	352	350
11	338	346	350	353	352	354	355	356	361	364	367	361	361	362	363	359	360	358	357	348	344	337	333	331	332	329	328	330	328	325	329	330	330	328	328	330	331	332	332	335	337	335	345	346	345	342	342	340	340
16	325	331	333	335	336	337	337	337	339	337	338	338	336	334	335	334	333	332	329	329	327	326	325	323	322	320	319	318	316	315	314	315	314	314	314	313	313	313	312	312	312	312	312	312	312	313	312	312	310
19	329	334	335	336	339	337	338	337	336	336	335	335	333	333	334	330	331	328	327	327	326	326	325	324	323	322	323	322	321	320	320	319	319	320	321	322	321	322	323	325	326	327	330	330	326	327	326	326	327
20	323	329	328	330	330	330	328	328	328	327	328	328	326	326	326	326	326	325	323	322	322	321	321	319	320	321	321	319	317	316	316	316	316	315	315	316	315	315	316	317	316	315	317	317	317	317	316	317	318
21	330	332	336	336	336	338	338	338	339	340	339	338	339	336	335	337	332	329	328	326	323	323	323	322	323	321	321	323	323	322	322	320	320	325	325	329	328	328	333	332	335	332	330	328	326	323	321	319	320
23	341	350	353	355	358	359	361	363	365	365	368	369	370	368	367	364	364	363	362	361	359	352	350	347	347	344	340	336	335	331	328	325	324	322	321	323	324	323	321	322	322	323	325	325	325	327	327	327	329
25	329	332	331	332	332	329	327	327	327	326	325	326	324	326	324	324	324	323	322	322	322	321	320	319	320	319	320	319	319	318	317	317	317	317	317	318	319	319	321	320	321	321	320	319	320	319	317	318	316
26	330	336	336	338	338	338	341	342	342	342	344	343	344	345	346	347	345	342	342	344	343	342	340	337	337	335	336	332	334	331	329	328	325	327	332	324	322	322	320	319	319	317	317	316	316	316	315	315	316
27	336	340	342	342	341	342	338	341	340	339	341	338	339	342	340	340	339	339	337	337	336	335	338	335	335	335	335	334	332	331	330	329	328	326	325	323	322	323	322	322	321	319	319	320	318	317	318	317	318
31	339	346	347	350	351	350	341	356	355	362	363	368	370	365	368	368	376	372	374	378	383	384	372	371	377	377	371	376	371	363	374	373	370	365	364	365	363	362	357	363	355	350	352	349	354	347	348	345	342
32	332	336	336	336	336	335	338	337	342	343	342	343	341	341	341	341	342	342	342	343	343	342	342	341	338	337	336	336	335	333	333	330	329	328	327	324	323	323	320	317	317	317	316	315	315	315	314	314	313
33	330	336	335	337	339	337	337	338	339	339	338	340	340	340	340	338	340	338	338	338	336	337	335	335	334	334	334	332	331	330	328	328	328	327	326	327	326	326	325	323	323	323	323	321	320	319	318	318	318
34	346	357	365	350	355	373	365	373	371	376	378	383	377	383	383	368	372	377	360	373	373	372	380	365	367	363	366	376	372	357	355	355	355	343	352	355	348	342	340	335	334	340	340	338	334	334	334	331	342
36	354	360	361	360	363	361	358	360	358	358	356	356	353	352	351	350	347	345	341	338	337	332	332	332	330	328	329	328	328	327	328	327	328	329	329	329	330	330	331	330	330	331	331	330	328	327	325	325	324
39	332	336	338	339	338	336	335	336	335	334	335	334	332	331	331	331	333	328	328	327	326	325	324	323	323	323	321	320	320	320	320	319	320	320	318	320	321	321	322	320	320	320	321	322	320	320	319	319	318
40	345	349	350	351	352	352	354	351	349	357	352	354	352	353	354	353	351	347	347	344	344	340	339	335	334	330	329	329	328	327	327	327	329	328	329	330	332	333	335	336	337	340	339	339	335	334	333	330	327
42	369	372	373	378	380	382	385	387	390	391	393	390	387	380	369	355	350	349	346	345	344	346	346	344	342	340	338	337	342	348	351	356	355	356	357	356	353	346	341	339	338	337	338	335	336	335	335	336	335
43	356	359	362	369	368	372	369	375	375	378	378	375	382	381	378	380	380	379	378	370	372	370	369	364	362	362	357	361	353	346	344	349	343	342	338	345	347	344	343	334	339	339	341	341	338	342	336	339	340
44	357	360	360	361	361	365	371	377	378	368	376	373	377	370	369	370	371	369	372	372	372	376	376	377	374	375	380	377	379	375	375	376	372	365	361	373	367	357	358	355	356	360	359	352	354	374	365	358	347
45	368	374	374	377	372	376	376	369	372	377	374	362	376	365	361	371	374	369	356	362	362	354	357	359	357	353	352	351	348	347	343	345	349	349	347	349	350	354	352	354	353	353	353	352	355	350	354	354	342
1	320	327	327	328	326	327	325	325	325	325	325	324	326	326	326	327	327	326	328	329	332	332	332	332	334	335	336	335	336	337	337	338	337	337	337	338	337	336	335	336	334	336	335	334	332	330	331	332	329
3	326	332	334	336	336	336	337	336	336	335	335	334	332	332	332	331	329	327	325	326	326	323	322	320	320	319	320	319	319	319	319	317	317	317	316	316	316	316	315	315	316	315	315	314	315	316	316	315	314
10	331	339	342	349	348	350	347	353	353	351	350	355	358	355	356	353	354	355	355	358	359	358	351	350	353	350	348	344	347	349	341	340	340	339	339	337	334	333	330	328	327	326	323	321	318	317	316	316	314
12	333	339	342	343	341	339	337	341	340	336	333	334	333	335	335	333	336	334	333	329	331	330	328	329	326	327	328	326	326	326	325	323	323	323	322	323	321	320	321	320	320	319	320	319	319	318	320	321	321
14	328	342	349	342	357	357	364	368	351	354	353	348	350	349	350	350	347	342	341	338	335	333	330	330	327	324	323	322	322	320	319	321	321	320	320	319	319	321	320	320	323	322	322	322	323	323	321	322	321
15	335	342	345	346	346	347	349	352	351	352	348	350	351	348	350	349	349	346	344	344	344	344	342	341	339	336	328	325	325	321	323	322	323	321	322	323	323	323	323	322	324	325	324	322	324	324	322	322	321
17	352	357	361	359	358	360	364	358	360	353	355	350	352	350	350	347	348	346	347	346	343	343	344	339	339	339	337	336	334	333	332	332	332	330	329	325	328	324	320	320	320	318	320	318	318	316	316	316	315
18	353	363	363	364	364	367	368	369	371	372	378	378	376	377	373	374	372	366	368	359	359	356	353	361	352	357	359	355	351	353	346	352	347	343	346	343	340	334	331	327	327	325	327	325	325	326	324	322	320
22	334	341	341	343	343	342	343	343	342	341	339	340	338	338	335	334	334	331	331	329	329	328	326	325	323	321	320	319	320	318	317	317	316	317	316	317	315	315	315	315	315	315	314	314	315	315	314	313	313
24	337	339	341	342	344	342	340	342	343	342	342	341	342	341	341	339	339	339	339	336	334	333	332	331	330	327	328	327	325	324	323	322	323	321	319	318	317	317	316	316	315	316	315	315	315	314	315	314	314
35	325	330	329	329	329	328	326	326	326	325	325	325	323	322	322	321	321	321	320	320	320	319	318	319	319	318	317	317	317	318	317	316	317	316	316	315	315	315	314	315	314	315	314	314	314	314	314	314	313
37	338	343	343	342	342	341	342	343	341	341	340	340	339	338	338	337	335	336	334	333	332	330	330	330	329	328	328	326	327	327	327	325	324	323	322	322	321	323	323	330	319	320	321	322	322	321	319	321	319
38	330	336	337	337	335	335	335	334	334	334	335	334	334	333	332	333	332	331	332	330	330	330	328	328	328	324	325	324	323	321	321	320	321	320	319	320	320	318	319	321	320	319	319	318	319	318	317	317	317
41	363	366	373	379	380	377	381	379	383	383	383	379	379	379	378	377	377	373	374	372	372	368	374	369	369	371	372	365	374	374	373	370	372	373	370	370	373	367	371	369	363	365	365	362	365	365	365	364	364
Raw Data of Experiment 2
Cell ID	F_1	F_2	F_3	F_4	F_5	F_6	F_7	F_8	F_9	F_10	F_11	F_12	F_13	F_14	F_15	F_16	F_17	F_18	F_19	F_20	F_21	F_22	F_23	F_24	F_25	F_26	F_27	F_28	F_29	F_30	F_31	F_32	F_33	F_34	F_35	F_36	F_37	F_38	F_39	F_40	F_41	F_42	F_43	F_44	F_45	F_46	F_47	F_48	F_49
1	266	268	271	271	272	273	273	273	271	273	273	274	272	274	276	276	275	273	271	269	271	271	272	272	273	272	274	276	277	279	283	285	285	290	288	289	289	289	290	288	288	287	285	283	280	279	276	276	277
2	270	273	275	277	277	278	280	282	284	285	287	288	287	290	292	289	287	285	286	285	282	283	283	283	282	284	282	281	282	286	286	289	292	292	293	294	295	299	299	299	295	291	289	286	281	282	283	281	280
6	266	268	272	273	273	274	276	278	277	278	277	276	276	277	276	274	272	270	268	267	269	269	269	269	270	271	275	274	276	279	281	283	283	283	282	280	278	277	274	273	273	275	274	275	274	273	274	274	273
7	282	286	289	299	297	296	298	306	294	310	301	294	285	287	283	284	283	282	277	276	280	284	283	283	284	287	293	292	295	298	300	300	307	297	292	288	290	287	291	295	294	293	290	290	288	288	291	291	288
8	282	290	291	295	298	297	299	299	301	301	297	292	290	286	288	289	284	281	281	282	281	280	284	283	285	288	290	294	296	300	301	302	301	301	295	295	293	290	285	288	288	287	286	288	287	286	290	290	294
12	270	276	280	279	280	281	279	282	281	281	279	281	283	280	279	281	277	274	274	274	275	275	276	274	275	277	277	275	275	277	278	281	282	281	283	283	282	280	279	279	278	276	277	279	279	279	278	277	278
14	267	269	272	272	273	274	274	275	275	276	278	274	275	279	277	280	282	276	277	273	273	274	274	274	273	276	279	280	281	284	288	292	296	296	301	298	302	305	302	303	298	290	288	284	282	281	281	279	279
15	269	271	270	271	270	271	273	273	276	276	275	277	279	280	282	283	282	283	279	278	278	275	273	272	274	274	274	273	272	277	278	280	281	281	281	282	284	290	293	294	294	294	294	292	291	290	287	285	280
16	277	283	287	290	292	293	293	296	293	295	294	293	292	289	289	283	280	280	277	276	279	278	278	279	282	286	287	294	294	299	302	307	311	313	316	315	317	314	309	309	304	302	297	292	288	285	283	282	283
18	274	281	282	281	282	281	282	284	285	284	282	282	278	277	277	278	277	274	273	269	270	269	271	271	272	274	274	273	273	275	276	278	280	281	281	280	280	281	280	278	278	277	276	278	277	277	275	276	277
19	266	267	268	270	271	270	271	270	271	272	270	271	268	270	271	271	269	266	264	262	264	266	265	265	264	267	268	266	267	269	270	273	274	273	274	275	276	276	277	275	275	274	273	271	272	270	271	272	273
21	285	290	291	292	290	292	291	292	295	295	293	296	300	297	297	297	296	293	293	288	289	290	289	289	287	288	287	285	285	284	284	286	288	288	286	287	289	292	294	295	297	296	295	294	292	288	286	285	284
22	275	281	281	279	279	281	280	284	282	283	285	282	279	280	281	281	282	279	275	276	279	279	280	280	280	280	282	279	281	281	284	286	289	290	288	287	284	285	284	282	282	281	280	281	280	279	278	280	280
24	281	278	283	281	277	280	283	282	281	288	288	284	282	285	285	283	285	283	279	282	281	284	284	286	282	286	286	284	284	290	292	292	293	292	295	293	296	297	293	294	293	290	291	290	288	285	288	288	290
25	282	284	283	287	292	284	284	282	286	292	291	291	287	287	287	289	287	284	282	279	279	280	280	280	281	285	279	280	280	282	282	285	285	289	293	292	295	297	299	302	302	303	299	295	288	286	285	284	285
26	284	285	289	287	289	288	287	289	291	292	295	298	304	304	307	307	307	304	302	302	298	297	294	293	292	292	295	294	292	292	290	294	296	296	299	299	300	304	307	308	307	306	304	303	298	295	293	293	293
27	277	280	283	283	283	281	284	282	280	282	280	281	281	280	282	281	280	278	278	276	279	280	282	281	282	283	284	285	289	294	296	295	303	307	307	305	304	301	294	287	286	283	285	283	282	280	280	281	280
28	271	274	275	275	274	276	276	277	277	276	277	277	277	278	281	283	285	284	283	283	285	287	287	289	289	290	288	289	288	289	289	288	287	285	284	282	280	281	278	277	277	276	276	277	277	276	276	276	277
30	273	275	277	277	279	280	282	282	282	280	281	280	280	279	280	281	280	279	279	278	279	278	279	280	279	280	281	281	282	282	282	285	284	285	283	285	286	285	288	289	292	292	294	296	298	295	297	297	298
31	275	277	280	279	280	279	282	281	280	280	279	279	278	278	278	278	277	274	273	273	274	274	276	275	275	277	278	279	281	281	283	283	283	283	280	280	279	279	278	277	276	277	280	279	278	279	279	279	282
34	289	294	297	298	293	295	299	297	296	298	298	295	293	296	299	298	300	297	293	293	295	295	299	299	297	308	313	314	324	327	324	324	309	303	302	304	299	302	299	296	296	295	297	297	299	297	300	304	305
35	280	286	287	289	290	290	292	293	291	291	293	294	294	290	290	285	286	288	286	284	287	289	288	290	291	294	296	298	299	306	307	312	313	306	305	302	296	295	293	292	293	291	292	293	294	295	294	293	296
36	277	280	287	287	290	289	292	292	294	288	285	280	276	280	283	282	281	278	275	276	277	277	277	275	276	276	276	275	274	278	280	279	278	279	280	282	283	285	287	285	284	282	281	280	279	278	281	281	281
37	281	288	292	291	294	297	299	300	299	301	294	290	286	282	283	287	285	284	284	279	282	281	283	283	285	285	291	288	291	298	297	302	303	306	302	299	292	292	288	289	288	288	290	292	290	288	288	291	290
38	275	274	281	286	284	288	292	292	291	289	292	286	288	288	287	286	284	280	276	274	274	277	277	276	276	279	281	284	286	289	292	296	298	296	297	295	292	288	283	282	279	278	277	277	277	276	277	278	279
39	274	276	278	278	279	280	279	279	280	277	277	278	277	277	279	278	276	274	271	272	273	274	274	274	275	276	277	276	278	281	280	283	283	282	281	283	280	280	278	277	277	275	278	278	277	275	276	279	280
40	290	300	304	312	309	307	307	302	300	298	297	297	293	293	301	300	303	298	292	297	300	296	301	303	300	306	306	308	309	317	316	315	308	316	316	316	314	313	312	303	300	296	295	291	291	293	290	292	291
3	273	275	277	279	279	279	281	280	282	281	280	280	280	280	280	281	278	275	275	275	277	279	279	279	285	286	288	284	284	289	289	295	297	298	297	296	301	295	291	297	294	291	290	290	291	293	294	293	293
9	264	265	267	267	267	267	268	267	268	268	267	268	268	269	271	271	271	269	268	267	268	268	269	268	268	269	270	268	269	269	270	271	272	273	273	274	275	275	276	276	277	276	275	275	274	274	273	273	273
10	261	261	262	263	264	264	263	264	263	264	264	265	263	265	267	267	267	265	264	263	264	264	264	265	264	266	266	266	265	266	267	268	268	268	267	267	267	267	267	267	268	267	268	268	267	268	267	268	267
11	263	264	266	266	266	266	267	268	267	266	266	265	265	266	269	270	268	266	265	264	266	265	267	267	267	268	270	269	269	270	272	272	273	273	271	271	272	272	271	271	271	271	272	272	272	272	274	275	274
20	267	270	271	271	270	270	271	272	272	273	273	272	271	276	279	283	282	281	280	281	283	284	285	286	288	290	292	291	293	294	295	296	297	298	298	297	297	297	295	294	295	293	293	291	292	290	289	288	287
23	271	272	273	273	274	273	273	274	273	274	275	275	276	278	282	283	283	281	279	277	278	279	279	280	279	280	279	278	280	280	280	280	279	279	278	278	279	279	280	282	281	280	281	281	280	282	281	282	284
32	270	270	273	273	276	276	280	280	281	282	287	288	288	292	299	277	300	299	301	299	299	300	301	298	294	296	294	294	289	293	292	293	291	291	289	287	287	286	284	284	283	283	282	285	283	280	281	282	283
33	274	277	279	278	277	277	279	277	277	277	275	276	273	275	275	274	274	270	268	267	270	271	270	271	271	273	274	273	274	276	276	279	280	282	283	285	285	288	287	288	289	288	288	286	284	283	283	283	284
1	274	276	275	277	280	283	281	281	284	288	285	283	285	284	285	285	282	276	274	272	272	272	274	274	274	276	277	279	279	280	281	282	284	285	284	286	286	286	284	282	284	281	280	278	275	277	277	278	278
2	276	277	280	282	283	285	286	285	285	285	284	282	282	281	282	281	279	277	276	276	277	278	278	279	280	283	287	288	290	294	295	296	297	293	291	289	284	283	283	283	283	282	283	283	284	285	286	286	287
3	285	288	291	291	291	290	290	288	286	284	284	283	281	284	286	286	287	284	283	283	284	285	285	283	283	284	285	285	287	287	287	287	288	289	288	290	290	292	292	290	290	288	287	287	288	287	286	284	284
4	285	287	290	294	297	303	302	302	306	306	303	302	297	294	288	289	290	286	284	283	283	281	284	286	285	286	290	287	295	292	294	295	294	294	294	295	298	299	296	298	302	304	300	300	297	295	294	293	289
7	283	292	291	294	297	299	302	304	305	302	307	300	302	304	292	292	288	296	298	295	288	290	277	278	279	288	293	291	292	296	294	290	289	292	293	290	290	291	288	289	288	287	287	286	285	285	284	285	284
13	266	267	269	268	268	267	268	267	266	266	266	265	265	266	269	269	269	267	266	266	268	269	272	273	274	276	278	276	278	276	274	274	273	272	271	272	272	272	272	272	272	272	272	273	273	273	273	276	276
14	282	285	290	292	297	296	299	296	296	295	292	290	284	283	284	282	282	280	278	276	280	280	279	279	280	281	282	282	284	284	284	287	289	288	287	288	289	288	285	282	282	282	283	285	284	284	283	285	283
15	286	294	299	298	301	304	306	310	308	308	307	291	292	287	290	289	289	284	284	283	284	284	286	284	284	286	287	286	292	291	292	295	296	294	295	294	295	291	289	287	288	285	283	283	282	283	282	281	282
17	302	322	322	329	340	343	344	339	329	341	331	329	326	330	328	321	322	310	314	314	312	305	306	301	299	303	303	293	300	296	294	295	296	298	296	306	307	310	312	309	311	315	311	311	309	301	302	295	300
18	307	313	317	318	315	319	320	316	320	320	319	319	314	318	318	316	315	317	317	317	322	320	319	323	324	325	333	338	336	338	341	348	342	337	334	332	333	334	330	328	322	314	319	319	323	322	327	318	321
19	275	276	276	277	280	282	287	285	287	291	284	290	292	283	296	293	299	295	288	287	287	288	288	282	279	283	283	281	283	283	281	280	283	285	287	291	293	294	293	296	294	290	288	283	281	281	281	279	280
20	280	284	283	288	292	293	291	289	290	287	281	286	281	279	277	277	278	276	274	274	275	277	276	278	280	281	281	280	278	281	281	282	282	279	284	287	285	285	284	282	279	282	281	281	282	280	281	279	282
22	273	272	271	271	273	272	272	274	270	272	271	271	271	271	273	276	274	272	270	268	269	270	271	271	272	273	274	275	276	278	279	281	281	283	282	281	279	277	277	274	274	273	272	272	273	274	274	274	275
23	272	274	280	286	287	287	287	294	286	285	282	275	276	274	274	273	272	273	270	270	272	271	273	273	272	273	275	274	274	275	276	278	279	277	278	277	275	273	273	273	272	272	273	273	272	272	271	270	272
24	267	269	269	273	272	272	273	272	271	268	268	266	266	268	271	271	270	267	267	267	268	266	271	269	271	270	270	271	271	272	273	275	274	273	274	274	273	271	271	270	270	269	269	271	271	270	270	271	271
28	281	285	288	291	294	303	306	295	301	290	296	294	291	283	280	280	277	276	274	274	278	275	276	276	275	277	279	276	276	278	283	284	285	287	287	291	295	295	290	288	287	281	280	279	277	277	275	275	276
29	275	277	282	280	282	285	286	286	284	284	284	283	279	277	277	276	275	273	272	271	274	272	273	273	273	274	276	275	276	277	279	280	280	281	282	284	283	285	285	285	284	283	281	280	279	277	277	277	276
30	280	284	285	285	286	288	287	290	290	288	289	288	287	290	289	288	284	281	278	278	280	280	280	281	282	283	285	285	286	288	289	294	296	299	300	302	304	305	303	299	296	291	289	288	286	285	284	285	285
34	267	269	269	269	271	272	273	274	275	273	274	276	279	280	282	282	285	281	280	280	279	279	278	278	275	275	274	274	276	276	276	276	277	278	278	281	281	284	288	287	287	289	290	290	290	287	283	280	279
36	276	279	282	284	285	287	287	286	286	285	282	278	275	276	276	275	275	274	273	273	274	272	273	277	278	280	281	281	283	285	287	288	289	288	286	284	281	280	278	277	276	275	275	274	275	274	274	275	275
39	279	281	284	283	285	284	285	285	286	285	283	283	281	283	284	282	279	276	276	276	280	281	281	283	284	289	294	296	300	303	307	312	305	302	296	290	291	289	289	288	288	288	285	286	285	285	287	286	288
5	270	271	271	272	272	272	273	272	273	272	271	270	271	272	274	274	274	273	273	272	272	273	274	275	276	275	276	275	277	280	282	282	280	280	278	278	277	277	278	278	277	278	278	278	283	279	280	280	282
6	285	291	293	293	290	293	294	297	298	300	303	302	303	306	305	306	307	306	306	308	308	309	313	313	311	314	317	315	315	322	325	329	333	330	331	333	339	335	331	325	335	331	318	318	312	306	304	299	296
9	290	291	294	299	302	299	300	304	300	298	295	293	290	292	295	297	296	295	293	291	289	297	295	297	295	294	298	295	291	298	299	300	296	296	294	295	294	294	291	292	292	288	292	292	298	296	301	297	300
10	286	289	293	293	296	292	293	295	294	292	293	290	292	291	290	290	291	288	289	288	287	291	290	291	290	290	292	291	289	290	286	284	284	284	281	280	281	282	281	281	280	278	278	282	284	284	284	284	285
11	272	274	274	274	275	274	274	272	269	269	269	269	268	270	272	272	272	271	268	269	271	270	271	271	273	273	273	273	272	272	272	274	273	273	273	273	273	272	272	272	272	271	272	272	272	272	272	272	272
12	267	268	268	269	269	269	269	268	267	267	267	266	266	267	269	269	269	268	267	267	267	268	269	269	270	270	271	271	270	271	272	272	273	273	272	272	272	271	271	271	272	271	272	271	271	272	271	271	271
16	264	263	265	265	264	264	265	264	264	264	265	264	264	266	268	268	269	267	266	266	267	268	268	268	268	270	270	270	270	271	272	272	272	271	270	271	272	271	271	271	271	270	270	270	269	269	269	270	270
25	271	273	271	268	269	268	267	266	265	264	263	264	265	267	269	271	270	269	269	268	270	269	271	272	272	273	275	274	275	275	274	276	275	275	274	277	277	279	279	276	276	275	276	276	277	277	277	277	279
33	266	267	268	269	268	269	269	269	268	268	266	266	265	268	269	270	270	269	269	268	269	269	270	271	269	272	273	272	272	272	274	275	274	274	273	274	273	273	273	272	272	271	272	271	272	271	271	271	272
35	266	267	268	267	268	269	268	269	268	267	267	266	266	268	272	271	270	269	268	267	269	269	269	271	271	271	273	272	271	273	273	273	274	273	273	274	273	274	274	273	273	272	272	272	272	272	272	272	272
37	271	273	275	277	279	280	281	282	282	285	288	287	288	293	294	297	298	298	295	281	293	296	296	294	298	297	301	300	303	309	306	300	300	298	300	300	299	301	307	304	299	297	295	293	295	290	292	291	290
40	293	296	299	298	297	296	298	300	299	297	297	299	302	302	301	305	305	301	302	301	300	302	302	299	298	299	295	292	289	287	286	287	286	284	284	285	286	285	286	285	288	286	288	286	292	290	289	287	287
1	292	293	298	295	297	303	304	306	304	304	306	304	295	300	296	292	294	296	297	290	285	288	292	293	299	298	300	298	301	307	307	297	296	299	293	295	292	290	292	295	298	299	295	293	291	299	298	292	305
2	281	284	285	286	287	288	289	287	280	291	297	291	285	284	283	276	280	280	278	277	276	276	277	278	277	279	280	280	281	281	284	286	288	287	288	287	286	284	282	279	279	277	276	277	279	277	277	276	275
3	269	271	272	273	273	274	274	274	274	275	275	275	276	278	280	282	280	278	275	272	272	274	273	273	274	275	276	276	276	278	279	280	282	282	282	283	283	282	281	279	277	276	275	275	275	275	274	275	275
7	272	275	276	275	275	275	275	275	277	276	277	277	276	279	283	285	284	282	280	279	278	278	275	276	277	278	276	276	276	276	278	278	277	278	278	278	278	279	279	280	279	280	280	281	281	281	280	280	280
9	308	310	321	324	318	321	332	331	334	334	325	315	316	316	311	314	303	306	304	302	299	303	303	301	302	301	305	300	305	308	318	322	324	316	319	308	309	301	300	299	302	298	299	298	302	301	300	299	297
13	274	275	279	279	284	283	285	283	282	282	281	279	278	279	277	277	275	273	274	272	272	274	275	276	275	278	279	278	277	278	279	280	281	280	279	280	279	279	279	279	280	279	279	278	277	277	276	276	277
14	266	269	270	270	270	269	270	269	271	271	269	269	270	271	274	275	273	271	271	271	271	273	274	273	274	276	279	278	276	278	279	279	278	276	277	275	277	276	276	277	277	276	277	279	279	278	279	280	285
16	273	274	276	278	279	280	280	281	281	281	282	280	276	276	278	279	278	276	274	274	274	274	276	275	275	277	278	277	279	280	283	285	284	285	283	283	282	281	279	277	278	278	278	277	276	277	276	277	277
20	271	275	275	276	277	277	278	279	279	278	278	276	276	277	278	277	275	270	268	268	268	269	269	269	269	271	272	272	274	276	277	278	280	280	281	280	281	280	279	278	278	276	275	274	272	271	270	269	269
21	284	289	291	301	298	292	300	295	307	294	299	287	290	287	283	284	285	288	283	281	280	280	284	282	282	283	285	282	284	287	285	286	291	291	292	290	293	293	289	289	285	280	280	282	282	281	282	280	281
22	273	275	275	275	275	275	277	277	278	277	277	276	276	280	283	283	282	280	279	279	280	281	282	282	282	284	285	284	284	285	286	286	286	285	284	285	283	283	282	282	281	279	277	278	277	277	277	277	277
23	282	281	283	289	285	283	283	286	285	285	285	284	285	288	290	291	290	287	286	285	285	285	281	286	285	289	290	290	287	289	291	293	295	295	296	295	295	294	291	289	289	290	289	288	290	290	290	291	288
25	289	289	292	292	294	295	295	296	295	295	297	295	298	300	302	304	306	299	300	300	303	304	306	309	309	313	314	315	316	315	317	315	314	312	308	307	303	302	298	297	303	298	297	297	298	296	296	297	298
27	291	290	296	297	291	292	288	284	281	283	282	275	276	279	279	285	284	284	283	285	287	290	281	292	291	289	294	293	288	284	282	279	280	280	280	280	280	278	277	278	277	277	277	280	280	281	283	284	286
28	280	283	284	288	291	292	297	296	294	290	286	287	288	289	290	293	290	288	287	285	285	283	286	286	285	288	291	288	291	293	298	305	307	307	305	305	304	304	301	297	295	289	290	288	288	285	284	283	286
30	280	284	285	289	291	290	294	295	291	293	287	284	282	283	285	286	285	283	283	282	281	282	282	285	283	285	285	286	284	286	286	287	288	285	286	285	285	286	286	287	288	285	283	284	282	283	282	281	281
31	291	295	299	299	303	304	303	305	310	303	305	302	301	301	301	301	301	295	293	289	289	290	290	288	291	292	294	292	296	296	300	300	301	301	302	300	299	295	293	290	289	288	287	288	290	290	289	288	289
33	276	279	280	282	284	284	286	286	287	286	285	284	286	285	288	289	287	282	278	275	278	278	278	279	278	281	281	282	284	285	286	288	289	289	288	286	282	281	280	279	280	278	279	279	279	278	278	280	281
37	291	300	305	308	312	316	322	323	320	315	313	313	315	315	301	313	311	305	305	300	302	305	302	306	302	302	307	307	308	314	312	316	315	311	310	314	314	307	312	299	300	298	295	298	298	303	303	304	301
38	272	277	278	279	281	281	283	283	283	281	281	276	275	276	276	274	273	272	271	269	271	271	271	272	272	273	273	272	272	273	273	275	274	275	276	276	278	277	276	279	280	279	279	277	277	275	275	274	274
39	299	305	312	315	320	319	320	320	321	319	320	315	310	310	308	307	303	302	297	292	295	296	294	292	295	296	300	299	301	304	306	313	315	311	313	311	314	314	308	307	306	305	302	301	301	300	298	298	302
5	270	273	275	275	276	277	276	274	274	273	274	272	272	274	275	274	273	270	269	267	269	270	270	270	270	270	271	270	271	272	272	273	273	273	273	276	276	276	276	277	278	278	277	278	277	275	274	274	274
6	272	273	275	274	276	276	276	276	279	280	279	279	279	281	284	287	284	282	281	280	282	281	281	280	280	278	278	278	276	275	276	275	277	277	275	276	276	276	275	277	276	276	276	277	280	279	278	278	277
10	283	288	286	284	283	280	278	275	275	274	273	273	273	275	277	278	277	276	275	272	274	276	275	274	276	278	278	277	276	274	275	275	275	276	276	276	276	276	276	276	276	275	276	277	276	277	278	278	276
11	274	276	276	277	278	277	277	278	278	278	279	278	279	282	286	287	287	285	285	284	286	286	289	287	289	291	291	290	290	292	290	291	291	292	291	290	292	292	289	287	287	288	286	286	286	285	285	284	286
15	273	273	274	276	273	274	274	275	276	277	276	273	274	277	278	280	281	278	278	276	280	281	279	282	283	283	283	280	280	284	285	287	288	287	286	287	289	289	288	290	290	290	290	289	288	288	285	287	287
17	271	272	272	272	273	272	271	272	275	274	273	273	270	275	277	277	277	278	273	274	275	275	279	275	277	278	278	276	274	274	275	275	275	274	275	275	275	276	275	272	272	275	276	275	277	276	275	276	275
19	263	265	264	264	264	264	265	266	265	266	265	265	267	268	271	273	272	272	270	269	272	273	273	274	274	279	280	280	281	283	283	286	287	289	288	291	291	287	289	291	291	289	289	289	286	285	284	283	283
24	277	280	278	278	278	280	283	283	283	284	284	283	286	288	289	289	284	285	285	280	287	287	287	288	299	301	307	308	312	320	318	322	322	317	309	301	292	286	284	285	285	282	281	283	284	284	283	282	283
26	271	273	272	273	273	276	276	275	278	277	277	275	278	282	282	281	279	280	276	277	278	277	277	278	280	280	278	277	278	281	280	285	285	284	285	286	285	285	284	286	285	285	286	285	287	284	283	283	287
29	283	284	284	283	282	281	282	282	282	281	280	279	278	281	285	287	285	283	281	279	279	282	283	283	282	283	284	284	284	285	285	285	285	284	284	283	282	283	282	281	281	282	282	283	282	283	282	282	283
35	277	278	282	282	284	283	288	287	288	291	293	288	279	280	277	278	284	292	292	291	291	290	290	284	285	284	284	284	282	282	283	283	282	284	284	284	282	284	283	284	282	283	283	284	285	283	282	282	281
[truncated: 95 more columns]

## Sheet: FF4
Raw Data of Experiment 1
Cell ID	F_1	F_2	F_3	F_4	F_5	F_6	F_7	F_8	F_9	F_10	F_11	F_12	F_13	F_14	F_15	F_16	F_17	F_18	F_19	F_20	F_21	F_22	F_23	F_24	F_25	F_26	F_27	F_28	F_29	F_30	F_31	F_32	F_33	F_34	F_35	F_36	F_37	F_38	F_39	F_40	F_41	F_42	F_43	F_44	F_45	F_46	F_47	F_48	F_49
2	297	321	327	328	327	328	330	334	331	331	331	330	331	330	331	330	328	328	328	327	326	324	324	323	322	320	319	318	316	316	316	314	312	312	310	310	310	308	307	307	307	307	307	306	306	306	304	305	304
4	315	341	352	355	357	361	367	368	370	372	375	376	376	377	377	377	373	371	370	367	363	360	358	355	355	353	352	350	348	346	345	343	340	341	338	338	336	334	333	334	330	330	328	328	325	321	317	316	315
5	316	342	348	351	349	348	354	357	358	360	363	364	364	365	363	364	365	362	362	358	356	351	347	344	341	337	331	325	321	318	315	315	313	313	312	312	311	311	312	314	312	313	314	314	315	317	316	318	318
6	297	318	328	328	328	328	328	327	328	328	330	329	333	332	331	332	330	331	329	328	328	325	328	329	331	325	324	323	323	321	320	321	319	319	317	317	315	320	321	320	317	317	319	318	320	321	321	324	323
9	297	317	324	324	324	323	321	322	322	321	321	319	320	320	320	319	318	319	316	316	316	315	314	313	314	313	313	312	312	313	314	314	315	315	313	314	313	315	316	315	317	315	315	314	313	312	309	310	310
12	336	362	367	372	375	375	376	379	381	382	384	380	385	387	383	380	385	386	379	371	374	367	366	364	361	358	351	349	348	347	342	343	343	340	339	335	335	333	334	334	334	331	331	330	330	329	328	327	326
15	331	361	369	372	371	372	367	380	386	386	389	385	392	382	389	377	366	370	359	354	349	352	339	336	345	342	342	335	340	341	336	336	333	334	334	334	333	331	331	328	328	327	326	325	325	326	325	323	323
16	326	355	364	373	376	371	371	358	375	377	389	384	389	386	383	383	384	387	362	376	378	368	366	373	368	361	359	354	358	355	364	360	360	353	354	348	345	340	341	339	337	337	336	333	331	329	329	330	330
19	316	342	350	351	351	352	356	359	358	355	355	352	348	344	337	335	329	326	325	322	326	325	324	323	322	324	323	322	323	324	324	322	324	323	325	323	323	326	323	322	321	317	316	316	315	316	316	317	317
20	319	340	347	348	348	349	353	353	354	355	357	356	354	353	353	353	351	349	349	347	345	345	341	340	337	335	332	331	329	327	325	323	321	321	319	319	319	319	320	321	321	321	322	324	325	327	329	329	334
21	303	321	326	325	325	327	324	324	324	323	324	324	321	320	322	321	322	322	322	319	318	319	319	316	316	315	315	314	314	313	313	315	313	313	312	311	311	310	310	310	309	309	309	308	308	308	308	308	308
23	296	318	327	328	328	328	328	329	329	329	330	330	333	331	331	332	329	331	329	328	326	324	327	329	331	326	325	324	323	322	320	320	318	318	318	318	317	319	321	320	317	317	318	317	319	320	321	324	323
26	306	325	334	337	339	339	343	344	348	347	348	348	348	350	354	353	350	348	348	345	339	337	337	333	332	330	331	329	328	327	327	326	323	324	322	320	319	318	315	315	315	316	314	314	314	313	313	312	311
1	333	344	350	347	354	352	357	357	359	354	359	355	350	348	351	345	346	344	337	335	329	329	326	323	320	320	319	317	316	316	315	314	316	317	318	319	318	319	320	321	324	323	322	322	322	320	317	315	312
2	342	357	364	369	370	372	377	377	375	374	377	373	367	366	368	363	365	368	358	352	350	344	337	334	336	332	330	328	326	325	322	323	322	323	321	323	323	326	326	328	328	327	329	329	327	326	323	324	318
3	335	353	354	356	353	360	360	361	359	356	360	364	366	366	360	356	350	344	340	337	331	329	326	323	322	321	320	320	321	320	321	320	319	321	319	321	320	324	322	322	324	325	325	324	323	325	323	319	317
4	336	349	353	354	360	363	369	370	373	371	370	373	376	377	375	374	371	375	368	366	362	355	347	345	343	340	337	336	337	337	331	329	331	329	330	333	334	332	332	332	330	332	333	332	330	330	329	331	327
6	344	352	354	362	361	362	375	373	369	370	374	373	374	375	377	369	375	371	372	367	364	369	365	357	362	361	361	356	355	354	354	350	347	342	338	337	343	340	340	341	338	333	337	332	331	330	327	326	325
8	320	331	332	332	333	332	326	327	330	329	328	327	325	325	324	326	325	325	321	320	320	316	315	316	315	314	314	315	314	313	314	313	313	312	312	311	311	313	313	313	314	312	311	311	313	313	312	311	309
10	321	332	336	339	342	343	345	346	346	348	343	344	343	340	340	338	336	335	332	327	324	322	320	317	317	316	314	313	312	312	313	312	311	311	311	313	312	312	313	314	316	317	315	317	317	316	315	315	314
11	325	337	337	337	336	336	335	335	335	336	334	331	332	331	330	331	328	329	327	327	327	326	323	320	320	320	321	320	318	318	318	317	318	319	320	321	320	321	322	322	319	318	316	313	314	311	309	310	309
12	312	325	322	324	326	328	327	326	325	322	326	325	324	329	330	334	329	327	332	331	333	332	330	329	331	332	336	336	335	332	337	339	339	339	337	337	336	340	338	337	340	337	334	334	333	334	333	334	332
13	316	330	331	335	339	340	341	343	344	347	345	348	348	348	349	348	347	348	348	346	345	345	343	342	342	341	341	341	341	338	336	334	332	329	327	324	321	316	315	312	310	308	307	308	307	306	307	307	307
14	340	352	356	352	345	365	358	353	358	350	344	357	358	356	355	360	352	356	343	349	343	341	337	327	337	323	335	329	327	328	325	329	321	325	328	329	327	329	331	325	324	325	319	319	325	321	319	319	323
15	311	322	322	324	324	326	326	327	327	328	327	327	327	328	327	325	325	326	324	321	321	319	316	315	315	314	313	312	313	311	311	310	310	310	308	308	307	308	308	309	308	308	307	308	306	306	305	304	305
16	317	331	332	334	333	336	337	337	344	345	349	351	351	355	355	354	351	349	348	349	345	341	340	338	336	332	330	326	323	320	318	316	315	314	312	312	310	311	310	311	310	309	311	311	310	310	310	311	313
17	317	327	326	326	328	328	328	328	327	328	327	328	326	325	325	324	325	324	321	321	320	320	317	316	317	317	315	314	313	313	312	312	311	311	312	312	310	310	309	309	310	309	308	307	308	308	307	308	309
18	309	320	321	321	324	326	325	322	325	327	329	327	326	326	324	321	319	317	315	313	311	309	308	307	307	308	309	310	309	311	310	309	306	304	304	304	307	308	308	308	309	308	307	308	309	309	309	310	309
19	311	323	323	324	326	326	326	326	326	327	325	325	326	325	324	325	323	323	322	320	319	318	318	316	315	314	313	313	313	312	312	313	313	314	314	315	314	314	315	315	317	316	315	315	316	315	313	312	310
21	322	334	337	337	339	340	338	339	341	343	341	344	341	342	339	341	340	339	338	335	333	329	329	326	325	322	320	317	316	314	313	313	312	311	311	311	311	310	310	311	312	313	313	313	314	315	316	315	316
22	314	327	327	329	330	331	331	331	330	332	332	331	331	331	330	331	327	327	325	325	323	320	318	316	314	311	311	311	310	309	309	310	308	309	307	307	307	308	306	307	306	307	307	306	306	306	306	306	306
23	320	333	337	341	339	342	343	347	348	345	348	345	345	347	343	342	344	344	340	338	334	328	325	319	317	315	315	313	313	314	313	313	312	312	312	313	311	312	312	312	311	312	314	313	313	313	312	312	312
28	333	349	349	347	350	352	352	351	353	353	350	351	353	349	351	351	353	352	349	342	339	339	338	335	334	332	331	329	329	326	325	325	324	325	322	321	320	319	320	321	320	320	320	317	316	316	316	317	315
29	360	369	370	375	380	369	370	369	363	357	363	378	369	374	378	371	377	385	370	374	367	368	367	367	366	365	353	354	351	348	344	338	338	339	334	337	338	343	345	340	339	336	341	340	335	331	347	348	355
31	346	360	360	355	360	366	363	350	367	353	365	333	354	374	361	377	375	372	373	372	374	364	372	361	362	360	354	354	363	351	345	346	347	350	348	343	341	338	340	340	342	341	339	337	335	335	334	334	331
35	340	346	357	365	364	373	371	382	377	382	381	380	376	368	388	384	378	384	382	363	369	373	372	363	361	354	350	345	342	337	331	327	322	320	317	315	322	324	317	319	315	313	316	316	316	316	314	313	317
37	324	334	335	336	337	337	343	342	346	347	345	345	345	345	346	347	342	343	341	340	344	341	336	335	335	336	334	334	334	339	339	338	333	334	333	330	329	330	328	328	326	328	334	331	329	327	324	324	324
38	348	360	356	359	362	363	366	369	368	367	366	369	368	372	374	372	370	371	369	366	365	367	364	363	358	359	357	358	361	359	358	356	355	356	354	353	355	353	350	352	354	354	353	350	349	347	342	340	340
39	348	361	373	371	373	377	377	384	384	383	381	381	379	379	374	379	377	376	378	374	372	370	372	369	369	369	371	376	372	366	367	363	363	362	366	365	363	358	358	357	354	359	364	363	362	361	357	353	354
40	352	358	357	361	358	364	359	361	364	361	362	359	362	361	361	357	358	361	358	355	357	354	353	355	350	350	346	347	350	351	352	347	350	349	341	341	344	346	344	345	351	343	348	344	343	348	343	342	342
41	336	353	350	353	356	355	355	356	352	352	357	351	352	350	359	353	351	347	338	340	338	334	332	329	330	327	327	323	325	325	325	325	322	325	327	328	328	330	331	332	330	333	333	336	330	329	326	324	324
42	332	348	350	356	359	362	359	363	367	366	371	376	377	378	378	379	381	384	383	377	377	376	378	376	375	377	377	376	376	373	371	370	371	373	368	370	368	362	359	359	359	357	354	351	345	345	341	337	332
43	349	363	369	371	375	382	383	383	383	384	387	384	385	383	381	382	379	375	374	371	367	360	358	354	351	346	347	345	341	338	337	334	333	332	330	331	329	331	333	334	336	336	341	343	346	346	349	351	355
45	333	343	346	346	346	347	350	349	348	349	352	351	350	353	352	352	350	346	345	344	341	339	335	332	330	327	328	327	327	326	326	327	327	327	328	327	326	327	326	327	328	325	326	326	325	323	321	320	319
47	348	360	360	363	366	367	369	374	373	375	375	372	372	375	373	372	375	370	365	358	354	350	346	346	345	344	344	345	345	346	348	350	352	354	356	359	360	367	365	364	365	367	364	361	364	359	350	346	343
48	330	341	345	344	348	349	351	352	351	349	349	349	348	343	337	334	331	331	328	326	325	324	324	325	324	324	324	325	326	329	328	329	331	334	336	340	341	341	345	343	343	340	335	329	326	325	324	326	324
49	326	336	338	338	338	338	339	340	339	339	339	339	339	337	336	335	334	333	331	330	327	326	326	324	323	324	323	322	322	323	323	324	325	325	326	327	328	330	330	331	330	331	331	330	328	328	335	333	328
50	326	336	337	338	341	341	339	338	338	336	336	337	335	333	333	332	331	332	330	328	328	325	325	323	325	323	322	323	322	320	321	320	320	321	321	321	323	325	325	325	325	325	324	325	323	323	323	321	320
51	353	365	371	375	381	384	386	392	392	390	394	394	393	388	390	387	386	377	379	371	365	362	359	357	353	351	353	348	349	346	348	348	348	353	352	357	361	364	368	370	369	368	368	371	368	366	363	362	360
55	352	364	365	367	373	371	369	376	372	369	373	368	372	368	365	365	363	365	360	355	351	348	347	346	343	342	341	342	339	336	337	338	339	338	339	341	343	344	348	348	349	349	351	350	352	355	351	350	349
56	390	409	420	409	407	403	404	422	419	431	437	416	414	407	403	398	396	395	394	385	380	377	373	370	371	369	364	365	365	363	362	363	369	366	362	353	350	358	362	369	366	372	368	365	361	364	361	364	362
57	343	361	374	384	358	366	387	384	389	383	384	398	394	385	389	383	401	397	356	398	386	385	375	382	378	393	423	412	350	339	335	335	339	337	334	328	334	331	338	334	334	338	339	336	336	337	337	335	337
58	356	370	379	389	393	387	401	411	406	409	399	399	375	383	365	361	350	347	343	337	335	334	335	332	329	328	332	332	332	332	333	334	336	335	337	338	338	344	339	339	337	335	331	328	324	323	323	322	320
59	374	384	380	390	385	368	379	373	401	386	381	404	387	382	399	423	411	398	395	393	392	387	396	394	396	394	383	391	381	393	385	386	391	388	382	380	368	384	380	379	373	379	368	361	355	357	363	355	350
60	339	346	353	356	358	364	365	369	369	368	367	367	365	364	364	359	358	359	354	353	353	348	349	345	345	343	338	338	339	337	332	334	334	335	336	338	339	340	342	346	346	347	348	348	348	343	347	341	336
1	330	344	340	351	353	353	354	353	357	356	358	353	356	353	357	354	348	341	345	346	344	342	333	334	336	333	330	326	325	324	324	322	320	320	319	317	317	318	316	317	315	315	313	314	314	312	311	312	311
2	360	373	380	385	387	387	387	393	394	393	394	391	391	390	388	387	382	376	373	368	363	359	356	350	349	345	342	340	342	340	340	343	341	342	342	343	342	344	346	346	346	344	342	342	340	336	333	330	328
3	325	338	343	348	353	352	354	356	355	359	356	353	354	352	350	352	348	344	340	341	340	336	334	334	339	331	330	330	329	335	328	329	328	328	328	329	330	332	330	334	334	333	331	331	328	328	327	325	324
4	337	341	340	341	340	341	343	346	340	339	345	343	341	344	344	344	343	340	343	337	336	332	331	333	333	330	331	330	327	327	324	326	324	322	321	318	319	319	318	317	317	317	317	317	315	316	316	317	315
5	335	348	350	352	353	354	353	354	354	357	356	357	359	359	357	357	358	360	360	356	356	355	355	344	342	343	341	337	334	331	331	328	325	326	324	325	325	324	324	325	326	327	328	329	332	334	333	333	336
6	353	364	370	377	380	383	385	391	391	397	398	394	396	403	397	393	387	386	382	378	376	370	361	357	351	347	343	338	335	334	334	332	331	329	329	329	329	328	328	328	328	328	328	328	327	329	328	326	325
8	342	349	353	357	357	357	360	361	361	365	368	366	365	367	365	366	371	368	373	375	378	377	380	381	382	383	384	387	384	383	381	383	383	381	377	377	381	377	376	368	368	364	361	358	353	350	345	342	339
9	349	356	357	358	359	359	360	361	364	372	374	372	375	373	370	370	366	370	373	372	367	366	363	361	361	359	359	353	352	350	351	352	350	347	348	346	345	342	341	341	345	346	344	342	343	339	336	334	331
10	339	355	355	360	359	359	362	367	364	364	363	364	364	361	360	363	362	363	362	364	365	364	359	357	356	356	356	355	355	351	349	348	348	345	342	340	336	335	332	332	332	331	330	329	328	330	329	327	327
11	332	344	347	351	354	356	359	362	363	361	362	362	361	363	360	359	358	358	356	350	347	343	340	336	334	333	332	330	330	329	327	328	328	328	331	333	333	334	336	341	341	340	342	338	340	335	334	335	333
12	353	362	361	369	374	371	383	380	374	385	389	393	390	390	395	391	380	377	373	374	366	368	361	360	356	354	347	346	342	338	337	339	340	332	331	332	332	330	328	326	329	327	327	331	326	325	325	324	324
13	326	333	336	338	338	340	339	340	339	342	343	343	344	346	346	344	343	341	341	337	337	333	335	334	333	332	330	329	329	327	328	328	326	325	325	323	322	321	320	318	318	319	318	318	319	318	318	319	318
14	331	341	343	349	346	353	346	346	344	343	346	345	345	343	343	342	340	340	337	338	334	328	333	332	332	334	333	329	327	325	326	326	326	328	327	326	324	324	324	324	322	323	323	320	322	321	322	324	322
15	323	332	335	338	338	339	341	342	343	342	343	341	342	343	342	342	337	333	333	332	330	330	328	328	326	324	325	327	330	327	328	326	328	328	328	329	330	329	329	327	327	325	321	318	317	314	314	314	313
16	346	360	360	368	371	370	372	374	377	381	402	391	389	379	380	380	382	384	380	379	372	366	365	362	359	356	355	351	351	349	347	350	348	344	340	340	348	351	353	343	350	339	345	352	346	351	354	348	349
18	325	336	344	347	350	348	350	356	355	354	355	359	354	353	355	353	352	348	344	338	333	330	324	322	321	319	319	318	317	317	317	319	318	316	316	316	317	318	318	318	320	321	322	320	323	322	324	323	323
19	337	347	351	352	354	352	356	355	353	353	354	355	353	350	348	344	341	338	334	330	326	322	321	321	318	315	316	316	314	313	313	312	312	313	313	314	316	317	318	318	320	320	322	321	321	321	320	318	316
20	341	349	358	361	353	358	358	361	361	347	346	352	350	353	364	353	355	353	351	352	341	345	340	337	338	338	327	337	334	339	334	336	332	325	328	325	326	325	323	320	322	321	319	318	317	316	315	316	316
21	346	354	361	366	368	372	370	373	368	372	373	377	373	381	381	382	384	387	385	380	381	377	381	380	380	384	387	383	384	388	385	383	383	379	382	379	363	364	377	371	369	372	369	363	359	359	355	357	356
23	313	323	325	327	327	326	325	325	324	325	326	324	322	322	324	324	323	322	321	320	320	318	318	318	317	317	319	318	317	318	318	319	317	317	317	316	316	314	313	313	312	313	311	311	311	309	309	310	310
24	313	324	325	327	329	328	327	329	326	326	326	325	327	324	322	321	319	319	318	316	315	316	315	316	317	316	315	315	314	314	315	315	314	314	313	312	311	314	313	313	313	313	314	313	313	312	311	312	312
25	318	329	332	334	335	335	334	333	332	333	330	331	331	330	330	328	327	327	325	323	322	321	321	320	319	317	316	316	315	315	314	314	314	313	313	312	312	312	312	311	310	310	310	310	309	309	310	308	309
26	312	322	324	326	327	326	325	326	324	324	324	324	321	322	322	322	319	317	317	315	314	313	314	313	312	314	312	311	312	311	310	311	311	311	310	310	310	311	310	310	309	309	309	308	308	308	308	307	306
27	322	331	334	337	337	337	336	339	336	336	333	335	336	341	339	337	335	333	334	334	332	331	329	330	327	326	324	323	320	321	323	320	318	320	321	321	320	325	324	327	330	329	330	330	331	328	331	331	329
28	318	329	332	334	333	334	335	334	333	331	329	331	332	332	329	328	325	325	326	324	323	321	319	321	320	319	318	319	318	316	314	315	314	317	319	322	321	321	322	321	323	322	324	323	317	318	315	313	312
29	337	346	350	356	357	359	359	360	364	365	361	361	359	356	354	355	351	349	347	336	338	334	337	331	328	331	324	324	326	327	324	322	322	321	320	323	324	322	323	324	324	329	329	329	329	328	329	329	327
30	341	354	354	358	357	358	367	364	362	367	365	366	367	362	364	361	357	357	356	349	346	345	336	334	333	332	332	327	328	329	325	328	326	325	326	324	325	327	330	326	328	328	333	330	331	331	330	332	332
31	320	327	331	334	336	332	332	331	331	333	331	331	330	329	329	330	331	330	331	332	329	329	329	330	331	330	332	330	330	330	330	332	332	331	330	330	331	330	331	331	331	330	331	331	329	328	329	326	326
33	357	364	368	374	373	375	379	383	380	378	379	379	378	376	379	377	373	374	372	371	368	368	364	363	359	358	357	355	353	351	352	347	348	346	340	337	333	335	336	333	332	332	334	336	337	336	340	340	342
34	367	378	387	400	400	412	404	430	422	419	428	431	423	422	409	405	412	399	405	404	398	400	397	405	401	399	401	390	391	389	379	388	386	379	367	373	371	362	355	349	343	343	348	349	347	351	348	350	359
36	352	365	367	373	375	381	387	384	387	387	383	396	392	390	382	384	373	378	372	364	357	351	355	345	349	342	340	342	344	343	349	353	352	355	360	361	366	369	368	368	370	369	365	367	364	358	354	352	344
37	327	335	338	341	341	341	341	341	341	341	341	340	341	341	340	339	339	340	339	338	334	331	328	326	324	323	323	323	324	323	322	322	323	321	321	321	321	321	321	322	322	322	324	321	320	320	318	319	316
38	328	339	341	347	349	352	355	357	355	361	357	356	354	352	349	346	342	339	334	332	327	326	325	325	324	324	324	324	324	325	324	323	323	324	324	323	324	324	324	324	323	324	322	322	321	322	320	320	320
39	330	340	341	346	346	345	347	346	344	343	343	344	341	339	338	337	336	335	335	336	336	337	337	338	338	340	340	340	341	340	340	340	339	338	336	335	332	330	328	326	323	323	321	321	321	320	319	322	320
40	332	341	345	345	347	347	349	348	349	350	352	351	349	350	351	352	349	349	348	346	345	343	340	337	337	334	333	331	330	328	327	328	326	329	327	327	327	327	327	327	327	330	328	329	328	327	325	324	323
41	343	354	360	365	368	368	369	367	369	370	372	371	371	369	369	370	368	364	368	368	365	365	362	364	363	355	359	358	356	352	354	354	352	346	346	344	346	345	345	344	345	345	350	350	347	350	352	352	351
42	326	333	337	340	341	341	341	343	342	343	343	345	345	344	344	344	343	342	341	339	338	334	332	329	329	327	326	326	325	325	324	324	325	326	326	326	326	327	328	329	330	330	331	331	330	329	327	325	323
43	328	335	338	340	340	341	344	343	342	344	343	343	342	344	343	342	341	340	340	340	337	334	334	332	330	329	329	329	327	326	326	326	325	325	324	325	324	325	325	326	327	327	327	328	328	328	329	328	328
44	345	353	356	358	360	359	354	355	354	355	355	356	354	355	354	350	351	350	352	351	349	347	347	347	345	345	344	341	339	337	335	335	334	333	331	331	329	330	329	328	328	329	327	326	327	330	331	331	332
45	331	338	340	340	341	340	339	340	340	340	339	337	338	336	334	333	332	331	330	331	331	328	329	328	327	326	327	326	325	325	326	325	325	326	325	325	324	324	326	327	327	327	327	327	327	327	326	325	324
46	339	350	358	367	368	364	368	362	367	367	361	365	373	375	378	372	371	370	362	379	364	361	356	350	354	350	350	353	350	347	348	344	341	338	341	339	337	338	339	340	340	344	343	345	342	344	347	347	344
47	335	342	333	334	353	338	350	351	346	354	348	353	362	349	352	351	349	346	351	349	351	336	351	349	350	345	344	343	340	344	339	338	336	333	335	332	330	329	325	323	323	324	322	320	317	316	316	313	314
49	341	348	360	368	364	368	371	376	382	390	389	390	392	391	388	389	389	389	389	388	384	377	377	376	370	369	366	361	361	362	356	357	356	356	357	349	347	346	348	347	347	347	326	329	338	344	344	346	344
50	372	380	386	388	380	388	384	387	384	386	387	380	389	377	372	361	365	374	366	361	357	353	352	349	345	346	345	342	342	341	343	343	341	345	345	348	350	363	353	359	362	358	359	357	353	350	347	351	344
51	363	371	377	383	381	383	382	381	389	389	382	381	383	384	383	383	387	372	367	360	371	368	369	364	359	351	351	350	354	352	350	347	347	346	341	338	334	341	334	338	333	334	336	328	327	329	329	328	329
Raw Data of Experiment 2
Cell ID	F_1	F_2	F_3	F_4	F_5	F_6	F_7	F_8	F_9	F_10	F_11	F_12	F_13	F_14	F_15	F_16	F_17	F_18	F_19	F_20	F_21	F_22	F_23	F_24	F_25	F_26	F_27	F_28	F_29	F_30	F_31	F_32	F_33	F_34	F_35	F_36	F_37	F_38	F_39	F_40	F_41	F_42	F_43	F_44	F_45	F_46	F_47	F_48	F_49
2	288	290	290	291	296	300	309	311	308	311	307	305	309	312	311	312	313	308	304	302	299	299	295	291	291	295	292	295	295	295	294	293	295	298	301	307	304	313	324	327	329	322	321	316	301	294	291	290	289
3	293	296	307	306	309	315	321	320	316	321	316	311	310	312	308	308	298	290	288	290	291	289	288	289	285	292	299	295	292	291	287	295	297	307	308	306	310	309	307	300	293	290	288	288	290	285	285	286	288
4	282	284	291	291	288	289	290	293	292	293	290	298	290	295	303	297	288	283	287	274	277	282	281	284	284	283	284	284	284	286	288	294	296	300	302	309	304	306	306	305	304	300	296	294	290	287	287	285	284
5	297	295	302	304	312	312	309	310	303	295	290	287	286	289	292	294	295	295	294	291	292	293	302	298	307	312	314	319	326	331	327	321	319	310	302	301	300	299	300	299	301	299	298	296	297	299	297	299	302
6	286	289	293	293	295	297	298	299	300	296	296	297	294	293	292	291	290	287	285	283	283	285	286	283	284	284	284	283	283	284	284	285	284	284	284	284	285	285	286	286	287	288	288	288	289	289	289	289	289
7	291	296	301	306	305	314	312	319	315	312	314	319	307	316	320	316	320	315	309	310	312	318	317	313	305	304	306	303	298	300	304	306	306	301	298	296	294	292	294	299	297	293	297	295	291	295	293	293	292
8	278	282	284	286	286	290	288	293	292	292	285	287	283	283	285	283	283	280	278	279	280	280	280	281	279	281	280	279	281	282	285	288	289	290	291	291	289	290	287	285	284	282	282	283	284	282	281	282	283
9	283	284	289	290	296	298	300	305	304	302	301	304	297	295	292	291	290	289	283	283	285	288	287	285	287	289	289	292	291	295	305	305	308	309	304	305	304	300	294	292	288	290	293	288	288	291	287	287	288
10	283	283	287	288	290	292	294	296	298	296	293	292	287	287	287	287	286	285	283	282	284	282	282	281	281	283	283	282	283	286	290	292	292	293	293	293	291	291	288	287	288	288	287	287	287	287	288	287	289
11	297	296	301	302	302	303	308	306	304	305	304	304	301	300	299	301	294	291	284	284	288	288	286	285	285	289	291	290	290	295	298	298	301	300	300	299	296	293	293	289	288	288	285	285	285	286	284	285	284
12	291	294	301	300	303	303	307	307	308	308	310	307	302	304	307	307	304	295	297	294	294	290	292	289	291	288	292	289	292	292	293	294	300	303	304	305	307	307	309	310	309	309	305	304	298	296	293	289	288
16	267	269	270	271	269	269	271	270	269	268	269	269	268	270	272	274	273	271	271	271	273	273	274	275	275	278	279	278	279	280	280	279	278	277	275	275	274	275	275	275	276	276	277	277	278	279	278	280	281
17	291	292	294	295	293	292	291	290	287	285	283	281	279	284	285	286	286	285	283	283	286	290	290	291	292	294	296	299	298	300	303	300	299	296	293	291	289	291	291	292	290	287	289	289	290	290	289	290	290
18	275	276	280	283	289	292	291	299	300	294	293	293	294	299	296	295	290	292	290	289	289	286	281	283	285	288	286	285	288	288	289	290	290	293	295	295	295	294	292	294	295	293	293	292	289	291	285	286	285
21	274	278	280	282	286	290	290	291	290	291	291	291	291	294	295	295	296	297	298	297	297	296	294	295	295	303	293	293	291	289	288	285	286	285	286	284	286	287	287	289	289	289	292	293	294	296	296	298	299
22	273	276	276	278	278	279	279	280	280	281	280	279	279	281	282	282	281	279	277	276	278	278	278	278	277	278	279	279	278	278	279	280	281	282	281	283	284	286	287	286	284	284	281	281	280	279	279	279	279
23	286	289	289	292	298	296	298	296	295	295	290	289	288	287	290	293	290	289	288	286	289	295	293	294	295	297	301	302	307	305	307	307	306	303	299	298	297	299	299	297	297	298	296	296	296	299	299	298	298
24	281	283	286	286	287	288	289	293	290	290	287	286	282	285	286	287	287	284	284	284	285	284	285	286	288	289	291	293	295	300	305	307	311	310	302	296	292	289	288	287	289	287	286	286	285	285	285	285	285
25	281	284	286	289	291	292	291	292	294	293	290	291	290	291	295	293	293	294	291	289	290	289	291	293	291	293	292	291	289	287	286	287	286	285	284	285	285	286	286	286	286	285	285	285	284	286	286	288	289
27	267	270	271	273	275	276	276	276	276	275	274	273	273	276	277	277	276	273	273	272	273	273	274	273	274	277	278	278	278	280	282	283	284	284	284	284	283	282	280	279	278	277	277	275	276	276	276	276	278
28	278	280	282	283	283	282	281	282	282	282	281	281	282	284	287	289	287	286	287	286	289	291	291	294	293	295	295	294	295	295	294	295	293	293	292	292	291	291	290	290	289	289	288	289	288	288	288	290	290
31	303	308	310	317	320	319	322	324	323	325	322	321	319	319	322	317	317	307	305	302	302	300	297	290	289	292	291	290	294	298	301	306	311	310	312	310	305	307	302	298	294	293	293	290	293	296	299	298	298
32	287	291	292	295	300	308	313	323	325	324	322	324	320	321	320	317	312	302	299	295	295	291	290	289	290	291	291	290	289	290	294	301	306	312	317	324	328	333	333	331	325	316	307	302	299	297	297	297	297
33	275	278	280	281	282	283	285	284	288	287	287	287	286	286	291	290	286	281	281	280	282	281	281	282	283	288	291	292	294	298	299	303	308	306	307	308	308	307	308	303	304	303	295	291	289	287	288	287	285
35	283	285	288	284	286	290	289	290	289	289	290	297	292	294	296	297	293	291	289	287	287	288	286	288	288	291	293	292	294	293	297	297	297	300	301	300	301	303	304	302	300	300	297	295	294	290	289	287	285
36	275	280	282	286	288	290	292	291	294	292	293	293	293	297	300	302	304	302	304	303	307	304	306	307	307	310	313	310	311	315	317	313	313	314	315	315	311	310	309	305	303	303	301	302	298	298	298	296	294
37	272	275	278	278	278	278	280	280	279	278	278	276	276	276	278	281	276	275	273	272	273	273	272	273	272	273	275	273	275	277	278	279	283	284	285	286	285	285	287	289	288	288	286	285	283	281	279	278	275
38	273	274	279	278	278	280	279	283	284	283	282	282	281	281	283	283	279	276	274	274	277	274	275	274	274	277	278	279	278	278	278	281	280	281	283	282	283	282	283	283	282	279	279	278	276	275	276	277	276
39	271	273	275	276	278	278	282	283	282	283	281	283	282	286	288	288	287	285	288	287	290	288	289	288	291	290	286	284	283	283	284	282	279	279	278	277	276	278	278	278	280	280	279	279	280	282	284	284	284
40	282	286	287	292	293	293	298	296	299	303	297	300	297	303	303	307	305	301	302	302	306	307	306	303	302	306	302	299	298	297	297	301	299	297	295	293	294	297	298	298	297	295	297	297	298	295	297	296	296
1	271	273	274	272	273	273	273	273	274	274	272	273	273	276	278	279	279	278	275	274	277	276	277	277	277	277	278	276	278	280	283	284	284	285	285	286	286	286	284	283	283	282	281	282	280	281	281	280	281
19	273	274	277	278	278	279	280	281	282	283	281	280	279	280	284	285	282	280	283	280	282	283	281	281	284	285	283	279	280	280	280	281	281	284	283	284	283	283	284	285	287	288	291	291	290	290	287	285	285
20	275	277	279	280	279	281	280	279	279	279	278	278	280	283	290	290	290	287	286	286	288	290	290	293	293	293	293	292	292	294	296	296	296	297	299	298	299	299	298	297	296	295	295	296	293	295	294	292	292
29	275	280	280	282	286	286	283	283	286	283	284	283	282	284	285	287	287	284	282	281	280	280	280	280	277	278	280	281	278	280	280	280	282	281	282	282	283	283	283	283	285	283	283	282	283	283	282	281	282
30	280	286	288	294	296	297	300	306	311	313	311	311	317	318	320	321	327	326	326	324	324	325	328	328	327	328	325	329	326	326	328	327	329	329	324	326	321	320	318	319	317	320	316	316	317	314	312	312	314
34	283	284	287	288	289	290	292	292	292	293	292	292	293	295	295	297	293	291	291	289	290	288	287	287	287	288	289	286	285	285	286	286	286	287	286	286	284	283	283	282	281	280	279	278	277	276	276	276	276
1	275	281	284	287	287	287	291	292	293	291	292	292	290	291	292	292	286	281	281	279	278	277	279	278	278	279	281	280	281	281	283	284	284	288	289	288	291	290	290	289	288	286	286	284	284	283	282	282	281
2	277	281	282	284	284	288	288	291	292	289	286	282	279	280	280	282	281	278	277	276	276	277	276	276	275	276	276	277	277	278	280	280	281	282	284	285	287	287	288	286	283	278	276	275	274	273	273	274	277
3	284	292	296	296	298	301	300	306	305	305	301	305	304	305	306	307	306	302	298	296	295	292	291	290	288	289	288	285	286	290	288	285	285	286	284	287	288	292	295	297	299	300	300	302	301	299	296	293	289
4	287	293	301	301	301	306	312	309	312	309	306	310	302	307	312	302	308	303	301	297	296	294	297	292	298	301	301	297	304	307	318	319	322	327	337	332	331	324	319	313	304	304	302	297	294	296	294	297	295
5	280	288	292	294	298	301	301	307	309	311	312	311	312	313	314	317	312	310	303	298	293	292	286	283	282	284	286	284	285	288	292	293	300	297	305	304	308	309	310	315	313	331	321	323	322	314	319	313	313
6	277	284	284	287	288	288	287	290	286	288	285	286	286	287	286	288	287	284	284	282	284	280	283	281	280	281	279	277	276	277	280	280	282	281	281	283	283	282	284	284	284	282	282	281	281	282	282	282	282
7	271	276	277	278	279	281	282	282	284	283	283	285	284	285	287	288	286	283	279	279	283	281	283	280	277	279	278	277	278	279	277	281	281	280	279	280	279	279	279	279	283	280	283	284	285	286	285	284	282
8	275	281	281	281	283	284	286	289	292	288	289	289	289	292	289	289	285	282	280	278	277	278	277	277	279	280	281	283	282	284	287	285	286	289	292	297	292	296	294	290	288	288	288	286	284	281	280	278	287
9	279	284	289	289	289	290	292	293	294	295	298	297	298	297	299	299	299	298	300	293	299	295	295	295	294	294	291	289	289	292	290	289	287	289	289	292	291	296	292	295	303	299	294	294	294	299	297	294	292
10	271	275	278	278	278	280	280	282	282	283	280	281	281	282	286	288	285	284	281	280	280	281	281	281	280	280	281	279	280	280	282	282	283	284	283	285	283	286	287	286	287	286	285	283	281	280	279	279	280
11	265	268	268	268	269	269	270	270	269	269	268	269	266	268	270	271	268	267	266	265	267	266	267	268	269	271	272	271	272	272	274	277	278	278	278	278	277	276	274	273	273	272	270	269	269	268	269	270	270
12	278	281	285	289	291	294	293	294	294	294	294	293	293	297	296	299	295	293	290	286	289	290	294	295	294	294	294	292	292	290	295	296	294	293	290	289	286	286	286	287	288	288	289	289	291	292	296	296	296
14	270	274	278	279	279	280	285	283	283	281	280	280	278	280	281	282	280	279	276	274	276	277	278	279	281	283	285	286	289	293	293	295	295	297	294	298	295	301	293	292	291	288	284	284	282	281	278	276	277
15	271	274	275	276	275	277	276	277	276	279	277	278	280	281	284	283	282	279	278	277	278	276	276	277	277	277	276	274	273	273	273	273	274	274	275	274	275	274	275	276	277	278	277	278	280	281	283	285	288
16	270	271	275	275	276	280	279	284	282	286	288	282	285	292	293	294	294	290	286	286	285	281	280	277	275	275	275	273	275	274	275	276	276	275	275	274	275	274	277	277	280	280	281	286	278	276	274	272	271
23	270	276	277	278	280	283	285	287	288	288	291	292	293	296	296	298	296	295	295	292	290	290	287	287	287	287	288	287	286	285	287	287	288	288	289	288	287	288	286	286	285	284	281	280	279	278	276	275	277
24	269	271	273	273	272	274	276	274	275	275	275	274	274	278	280	280	278	276	275	274	275	276	276	276	278	279	279	278	278	279	279	282	280	280	279	279	279	280	280	279	278	279	280	278	278	278	279	279	278
25	290	292	296	301	304	304	306	310	307	303	307	302	298	298	294	288	285	283	282	279	283	282	283	284	284	284	286	287	288	292	298	304	312	319	322	317	318	306	295	289	285	284	283	285	285	287	285	286	284
27	273	275	277	277	277	278	280	280	281	281	281	281	280	283	284	284	284	282	280	280	280	281	282	282	283	285	286	286	287	289	291	291	292	294	294	292	293	292	293	293	293	292	290	291	289	288	288	287	287
28	282	285	288	288	289	290	290	291	291	292	290	289	287	287	288	289	288	287	286	285	287	288	288	287	288	289	290	290	292	293	295	297	298	299	298	298	297	296	293	291	292	290	290	290	290	292	293	295	296
30	275	277	280	280	282	282	283	283	284	283	283	282	280	281	283	284	284	280	277	278	278	280	278	277	278	281	281	280	279	281	284	285	284	287	287	289	288	288	288	288	288	287	286	283	282	279	279	279	279
31	279	281	284	285	285	286	289	289	288	285	286	283	278	277	276	275	273	273	270	269	272	270	270	270	270	272	274	275	277	279	280	282	284	286	284	283	283	282	280	277	276	276	275	274	273	274	275	276	276
32	277	279	283	285	286	286	287	288	291	290	291	290	287	292	289	291	289	284	279	275	276	277	278	278	277	279	280	279	278	280	282	283	283	285	285	286	285	284	281	279	276	276	274	275	274	274	274	275	277
33	272	274	276	278	278	281	283	282	284	285	285	284	283	286	288	287	286	283	281	279	283	280	279	278	275	277	275	275	275	276	277	277	279	280	280	280	281	284	284	285	285	285	283	283	280	280	279	280	281
34	279	281	282	281	282	285	288	288	289	288	287	286	281	282	284	284	281	279	278	276	277	279	278	280	280	282	285	287	290	292	297	297	299	297	296	292	288	285	281	281	281	281	281	281	281	280	281	280	281
35	280	286	289	290	287	288	290	290	291	288	290	289	288	289	288	291	285	283	283	281	285	281	286	289	283	285	286	284	281	282	285	285	287	288	285	285	285	285	286	288	289	289	288	289	287	289	286	286	285
36	303	305	310	315	312	316	328	330	333	337	334	326	320	324	323	323	322	322	312	310	309	307	309	304	305	309	308	306	301	301	304	305	305	304	310	314	314	316	313	311	304	308	306	302	300	295	294	295	294
37	271	273	276	276	278	279	280	283	282	282	282	282	283	282	283	282	280	276	275	274	277	275	276	276	277	278	281	282	284	288	290	292	293	294	293	292	288	285	284	281	283	281	279	278	278	280	279	280	280
38	277	278	281	281	282	282	284	285	286	286	283	286	284	286	287	287	284	279	278	275	277	277	278	276	278	280	282	282	285	287	287	287	287	285	283	282	281	280	280	281	283	281	281	280	281	280	279	279	279
39	285	283	285	286	287	288	289	289	289	285	285	285	281	281	280	280	278	275	274	272	274	273	274	274	273	276	276	277	278	282	281	282	282	281	280	278	277	278	276	276	276	277	275	275	274	275	275	274	273
40	271	273	277	278	279	282	284	283	282	282	283	282	281	285	285	285	281	278	275	274	275	273	273	272	272	273	274	272	273	273	275	278	277	277	278	279	279	281	281	282	279	279	279	276	275	275	275	274	274
19	273	274	273	276	277	278	281	281	281	282	278	280	279	284	287	287	285	283	283	281	283	283	284	283	282	284	287	287	286	286	288	287	287	286	286	287	287	287	285	286	286	286	286	286	285	285	286	286	286
17	271	275	277	279	280	281	284	284	286	284	275	274	271	276	275	276	274	271	271	269	273	274	274	276	277	278	280	279	280	282	281	281	280	278	278	276	277	277	276	276	276	276	275	274	275	275	274	274	273
13	267	269	271	272	272	274	277	279	277	279	280	280	281	284	287	287	285	283	280	276	278	281	285	283	284	291	292	295	297	300	303	303	307	310	310	310	310	311	309	309	312	311	312	310	309	309	308	306	307
18	273	273	274	276	277	276	280	282	282	279	281	275	276	277	281	284	280	280	279	278	282	279	286	285	287	286	287	281	285	286	289	286	288	291	286	282	281	281	281	283	279	281	283	279	279	283	283	283	285
20	268	269	271	271	270	270	271	271	271	271	269	270	269	271	272	274	271	269	268	268	271	270	271	272	272	275	277	276	278	279	282	284	285	287	287	287	288	288	289	288	288	289	290	292	293	294	297	299	303
21	286	284	286	289	290	292	290	290	290	288	287	286	286	288	292	295	294	290	288	287	286	285	285	285	285	286	287	285	286	284	287	287	288	288	288	286	289	286	285	286	286	283	285	284	284	283	284	283	284
22	278	281	285	285	284	286	285	287	286	287	286	287	291	294	295	294	292	291	290	291	293	289	296	298	299	299	310	309	308	308	300	306	307	311	311	310	308	311	313	306	305	306	305	302	297	302	297	299	296
29	278	281	283	284	284	284	285	286	285	285	284	285	284	287	289	290	289	287	286	284	287	286	289	286	287	288	288	287	287	289	289	290	289	289	290	289	288	287	287	286	286	285	283	282	282	281	281	279	279
2	281	288	289	293	294	294	294	296	297	297	298	297	296	302	303	306	303	299	296	293	296	296	296	293	293	293	290	290	290	290	290	290	290	290	290	288	290	291	292	294	295	296	296	297	296	298	298	298	298
4	279	284	285	288	289	294	292	291	292	292	291	291	292	298	294	297	295	293	292	289	291	289	288	287	286	286	286	284	284	283	282	282	283	282	282	282	283	283	286	286	288	286	288	288	291	290	289	288	288
5	275	281	283	286	288	290	292	293	292	291	291	291	287	289	290	294	294	293	287	289	293	291	293	294	298	299	303	306	303	309	307	310	313	310	308	306	306	305	303	298	296	295	296	295	292	291	286	286	285
6	272	278	280	284	285	287	288	288	288	289	287	288	286	287	286	287	282	281	279	276	278	278	277	277	277	280	280	279	280	282	283	285	287	287	288	287	285	282	281	279	279	278	278	277	277	277	277	278	279
7	279	286	288	291	294	294	293	294	300	298	295	296	291	296	297	296	293	290	288	286	284	283	280	276	274	277	277	274	274	275	275	276	279	281	281	284	285	289	292	293	293	292	292	292	291	290	287	284	281
8	274	282	285	289	290	292	292	290	291	292	294	295	293	291	294	293	293	295	288	285	287	285	283	285	288	289	292	290	292	292	295	294	297	298	294	295	294	291	288	287	286	284	287	287	287	287	286	285	287
11	291	297	295	295	304	298	302	299	297	298	296	296	297	296	298	299	299	295	294	294	298	297	300	297	301	306	308	307	305	310	305	309	306	304	307	309	305	303	302	301	302	300	302	296	294	298	296	296	294
12	267	273	272	273	274	274	273	274	274	273	275	274	275	278	280	282	280	280	279	279	282	283	285	286	288	290	291	291	293	294	294	295	295	294	291	289	286	282	281	279	279	278	278	278	278	277	278	278	278
13	291	301	302	307	312	312	311	313	311	310	307	302	304	302	302	301	298	294	291	290	287	289	289	291	290	291	293	295	295	295	297	301	304	305	305	304	306	304	303	303	301	300	296	296	294	292	292	291	293
14	275	278	280	279	281	286	281	281	277	278	277	280	280	286	287	287	284	284	279	279	281	282	284	285	284	287	288	289	291	293	293	296	297	296	293	289	288	285	284	283	285	283	283	282	282	282	281	281	281
15	284	289	288	294	298	296	298	300	308	303	308	304	304	307	309	307	302	296	291	289	288	289	288	288	286	287	286	287	286	286	287	292	294	297	296	298	299	301	303	304	305	304	300	296	293	290	289	287	286
16	284	290	292	293	294	292	292	292	290	289	286	284	285	285	285	287	286	285	284	282	284	287	289	290	291	294	294	296	297	298	300	302	302	300	295	293	291	292	290	291	290	292	292	291	292	291	291	293	296
20	295	295	296	299	302	303	310	304	301	300	298	296	298	298	297	300	298	296	293	291	291	290	289	289	290	293	292	292	294	295	299	302	305	306	307	309	309	311	309	306	306	303	301	301	299	298	298	298	301
22	287	296	298	302	308	308	313	313	317	321	320	318	319	322	322	321	319	313	309	307	303	304	302	296	294	292	291	289	286	288	288	288	287	286	286	288	290	294	297	297	298	300	304	305	303	301	298	296	294
24	273	281	284	287	289	291	291	295	294	294	293	292	289	289	287	288	284	280	279	278	279	278	281	282	282	283	289	288	289	294	297	297	301	306	308	310	308	310	301	299	295	290	287	284	283	283	282	283	283
25	276	280	281	282	281	284	283	284	285	287	285	285	284	293	288	291	286	285	283	282	285	284	286	287	286	287	289	292	289	291	290	289	288	286	286	286	287	286	286	287	285	285	284	284	283	283	283	284	283
26	291	295	298	301	301	302	302	305	303	299	299	303	301	305	310	313	308	307	300	299	300	305	309	311	306	299	301	300	300	301	298	300	301	299	298	297	297	295	295	293	291	290	289	289	288	286	288	289	290
28	274	277	277	281	284	283	282	281	280	281	278	280	280	284	286	287	285	284	285	284	285	286	286	284	283	284	283	282	284	282	283	285	284	284	285	285	287	286	288	290	289	288	290	290	292	292	292	289	286
30	280	285	293	296	295	300	301	299	296	294	296	292	293	292	292	290	284	282	283	281	284	284	284	283	285	285	288	283	282	286	292	301	299	300	299	301	300	297	297	294	293	290	292	291	292	293	292	290	290
9	303	317	326	322	326	328	327	326	328	322	333	326	329	334	326	328	308	319	315	309	303	315	313	308	300	303	308	302	299	304	304	297	297	289	288	296	296	296	296	293	292	293	297	296	293	292	293	291	292
18	287	283	285	289	290	290	290	286	290	290	292	290	293	293	299	301	301	297	296	304	304	310	313	312	313	317	322	327	326	328	331	331	330	331	331	331	342	338	336	338	341	337	333	329	330	330	327	324	322
19	280	286	284	286	286	290	289	286	286	288	288	290	294	293	299	300	302	301	300	301	307	303	304	310	310	312	312	308	306	308	311	307	305	301	303	302	307	300	305	301	295	297	292	291	289	288	283	282	281
23	273	277	278	279	279	278	277	275	273	273	272	272	270	273	274	277	275	274	273	274	279	281	284	288	293	297	299	300	307	306	306	306	306	306	305	304	297	297	292	289	288	283	280	280	279	279	277	278	278
27	290	295	298	301	300	300	299	299	298	298	296	297	297	299	302	303	302	300	299	298	299	299	299	300	299	301	302	300	301	300	300	301	301	299	300	300	299	300	300	299	299	298	300	298	298	298	298	298	298
29	277	281	280	281	281	282	283	283	281	280	279	281	278	284	286	287	285	283	280	279	280	280	281	282	282	282	281	280	280	280	281	282	283	283	284	285	286	286	285	286	286	288	290	289	291	290	289	289	288
[truncated: 76 more columns]

## Sheet: WT
Raw Data of Experiment 1
Cell ID	F_1	F_2	F_3	F_4	F_5	F_6	F_7	F_8	F_9	F_10	F_11	F_12	F_13	F_14	F_15	F_16	F_17	F_18	F_19	F_20	F_21	F_22	F_23	F_24	F_25	F_26	F_27	F_28	F_29	F_30	F_31	F_32	F_33	F_34	F_35	F_36	F_37	F_38	F_39	F_40	F_41	F_42	F_43	F_44	F_45	F_46	F_47	F_48	F_49
1	282	284	284	285	284	283	284	285	283	282	280	278	275	276	273	272	272	273	273	274	273	274	273	272	272	273	276	274	276	275	274	273	271	272	272	272	271	270	274	273	273	272	274	274	273	274	274	277	279
2	296	296	295	293	291	289	287	288	286	286	285	287	286	287	284	282	281	282	280	280	278	279	281	281	280	282	287	285	287	286	288	288	286	285	285	286	281	282	281	280	281	280	279	280	280	281	280	281	279
3	277	276	277	277	278	277	276	276	275	273	273	272	271	271	270	269	269	272	270	269	267	268	268	268	268	269	271	271	272	271	271	272	272	273	272	272	272	271	271	271	272	271	271	271	270	272	272	270	270
4	297	304	305	302	304	302	298	298	295	292	289	289	287	286	284	281	283	284	282	282	281	281	281	280	283	284	286	288	287	286	286	287	287	284	283	282	282	282	281	279	279	279	280	281	281	282	282	284	284
5	305	308	310	308	308	308	306	308	309	307	304	305	300	300	299	297	298	299	298	298	297	295	295	292	292	294	298	294	294	295	295	298	297	296	297	295	293	292	290	290	287	285	286	288	288	292	289	291	293
6	283	283	284	282	282	283	284	284	285	285	283	284	283	282	280	277	276	279	277	276	274	276	276	275	275	277	279	280	277	278	278	280	279	278	279	279	278	278	278	278	278	276	277	276	276	277	275	275	273
8	278	279	278	282	278	279	282	280	278	275	280	279	278	281	282	279	279	280	278	278	273	274	274	272	271	272	274	271	271	270	270	269	269	270	269	268	269	270	268	269	269	267	268	269	270	270	270	270	269
9	303	301	299	295	291	289	286	285	282	279	277	277	273	272	271	270	268	269	270	269	269	270	271	270	270	272	274	275	276	276	278	279	279	278	276	274	275	272	269	269	269	269	268	269	268	269	268	269	270
10	280	280	280	282	280	279	280	276	276	273	275	275	273	274	273	272	272	272	270	270	270	270	270	269	271	272	273	272	271	271	271	271	271	270	271	270	269	269	270	269	267	267	268	268	268	267	266	266	267
12	270	270	270	271	270	270	269	270	270	268	268	272	270	271	268	267	266	268	267	266	266	269	267	266	266	269	272	273	273	272	275	275	275	274	273	272	272	270	269	270	271	271	271	268	268	268	268	268	267
13	274	274	274	271	271	269	271	268	268	268	269	269	269	269	267	266	266	268	267	266	265	265	265	265	265	266	267	267	266	266	268	269	269	268	270	270	268	268	268	268	269	268	268	267	266	265	265	265	263
14	278	276	274	275	276	276	276	276	273	273	273	274	275	275	272	271	271	272	270	271	269	270	270	270	268	269	273	272	272	270	271	270	271	272	271	272	273	272	272	272	271	273	272	273	272	273	271	270	271
15	275	276	277	278	277	278	278	276	276	276	276	277	276	275	274	274	270	272	269	269	268	267	266	264	264	263	266	266	266	265	266	266	265	266	265	265	264	263	263	261	263	262	263	263	261	261	261	261	262
16	292	295	294	294	293	292	292	291	289	287	284	284	281	281	280	275	271	276	273	275	272	273	272	273	270	270	272	277	277	274	276	273	274	274	273	274	275	272	273	275	273	273	272	272	271	271	273	271	273
17	296	297	290	290	294	293	292	290	285	288	280	287	289	293	291	289	288	290	286	285	283	284	283	279	279	278	282	282	281	281	280	277	280	280	280	278	279	279	277	280	282	283	282	281	279	280	278	276	276
18	302	303	302	304	301	300	298	296	292	294	293	291	286	284	285	280	283	287	285	283	281	279	282	281	280	284	287	288	288	286	289	288	287	285	287	285	283	281	279	279	277	277	276	276	276	277	277	277	277
19	297	299	298	296	299	300	296	292	297	295	301	297	297	293	292	292	290	290	287	290	288	288	285	286	284	285	288	287	285	286	285	285	287	286	287	287	283	282	281	284	283	283	279	279	280	280	280	282	280
20	281	282	281	283	284	282	283	282	283	285	283	285	285	285	282	282	282	283	280	278	276	277	275	274	274	276	276	278	277	278	277	279	279	278	279	278	279	278	277	280	279	276	279	279	280	280	280	281	281
21	281	282	283	280	281	281	280	280	278	277	277	276	274	273	272	273	270	270	269	270	268	268	269	269	270	270	274	275	279	281	279	277	276	273	271	271	270	271	270	270	270	268	267	268	269	268	268	268	268
22	287	283	284	288	284	284	285	287	288	284	286	288	287	288	286	284	283	283	281	279	278	277	275	273	272	272	277	277	275	276	275	275	275	274	275	275	275	275	277	277	277	276	276	276	273	270	270	271	272
23	300	300	301	299	294	294	293	290	290	289	287	288	286	288	286	283	282	284	282	281	279	280	279	278	278	278	280	280	280	282	284	284	284	283	284	284	285	284	284	287	287	287	286	284	282	282	281	282	282
24	283	282	282	279	281	279	276	278	279	281	283	284	287	286	287	286	287	289	289	292	292	294	294	295	295	296	299	298	299	299	298	296	297	296	295	294	294	293	293	292	294	294	292	292	293	292	292	292	292
26	277	275	273	273	274	273	272	271	269	269	269	270	268	270	268	267	266	267	266	265	265	266	266	264	266	265	269	270	268	269	268	268	269	268	266	266	265	264	265	265	265	266	265	264	265	264	265	264	264
30	297	300	300	298	297	297	296	297	296	295	294	295	291	292	290	289	286	286	283	282	280	279	279	280	279	280	284	282	283	282	282	281	279	280	279	280	281	280	281	282	281	279	278	280	277	279	279	279	277
32	294	297	300	303	303	301	297	296	292	287	285	286	281	283	283	280	281	282	280	279	281	281	282	282	285	287	289	287	285	283	283	280	281	281	280	280	280	279	282	282	281	278	279	280	279	280	281	281	279
35	282	283	285	287	285	284	283	285	287	286	281	282	279	281	278	276	275	275	273	272	270	272	270	269	269	270	274	273	274	274	275	275	274	273	274	274	274	276	275	275	272	272	271	271	270	269	269	268	269
36	301	301	305	303	303	301	301	302	303	302	300	301	295	294	290	287	286	286	283	282	281	284	283	282	282	281	283	283	286	287	285	285	287	289	288	287	287	283	286	284	283	282	282	281	282	282	282	281	284
37	315	318	319	313	311	308	301	300	300	302	301	303	298	298	297	294	293	295	291	293	291	290	290	288	288	289	291	290	294	292	294	292	293	293	290	290	288	289	287	288	285	284	284	284	285	281	281	280	284
38	293	292	294	295	296	295	294	292	291	291	292	290	288	289	287	284	284	287	283	282	282	285	287	287	289	286	290	287	291	293	290	291	291	292	290	291	291	291	291	290	284	286	292	291	285	285	284	284	282
42	291	288	293	291	292	291	290	290	292	291	286	285	283	282	282	281	279	279	276	277	275	276	278	276	275	275	279	278	279	280	279	280	281	282	280	278	277	276	275	275	272	271	270	270	271	273	274	273	273
43	291	289	288	287	286	284	284	284	285	283	282	284	281	281	280	277	277	277	274	274	275	273	274	275	274	275	277	276	278	281	278	280	280	279	276	276	280	278	277	277	277	275	273	274	274	273	272	272	273
45	287	288	287	285	284	284	284	283	281	280	280	282	279	280	279	278	276	278	275	276	276	275	275	274	274	274	279	279	278	279	278	277	279	278	279	278	278	279	281	282	281	283	284	287	287	286	289	288	287
46	286	285	275	276	273	278	277	279	279	280	282	285	279	283	282	280	281	282	279	278	272	272	273	272	271	273	275	274	276	276	277	278	278	279	277	279	278	279	281	280	280	279	277	277	277	276	275	275	272
48	298	299	298	296	296	296	294	295	295	291	290	288	286	286	285	283	282	283	281	282	279	280	282	281	281	280	284	284	285	284	283	283	282	282	281	282	280	280	282	280	278	276	277	277	275	276	278	276	276
50	278	278	278	276	276	273	272	272	272	271	271	272	271	272	270	269	267	269	267	267	267	267	267	267	268	269	274	272	274	275	277	274	273	271	270	269	268	268	270	268	266	265	266	266	265	265	266	267	267
2	279	280	283	282	281	282	281	282	285	281	279	279	276	277	276	269	269	269	267	267	264	266	266	264	265	264	267	267	269	271	273	272	273	271	269	267	264	266	265	263	263	263	263	263	263	262	263	265	265
3	275	276	277	277	278	281	276	277	279	279	277	276	273	272	271	270	269	269	268	267	265	267	266	265	265	264	268	270	269	270	272	273	278	278	276	274	272	272	270	267	266	265	264	264	264	264	262	262	263
5	272	277	277	280	277	278	279	273	277	273	270	271	270	270	267	266	264	269	265	268	266	267	265	267	268	269	269	271	273	273	273	272	272	270	269	270	268	266	268	266	266	267	265	264	264	269	266	268	266
7	275	276	278	276	280	282	281	278	280	282	282	282	281	280	279	276	277	274	272	269	270	270	268	267	268	266	268	271	269	270	268	271	270	271	270	269	269	270	270	271	272	270	269	268	272	268	268	268	267
8	287	290	289	292	289	292	292	294	292	291	288	285	281	279	278	276	275	278	274	275	275	276	276	275	274	274	277	279	281	280	280	281	279	280	281	279	279	281	279	280	282	283	281	283	281	283	284	287	287
10	275	277	276	275	272	272	269	270	268	267	266	268	266	267	266	265	265	268	265	266	264	263	265	265	265	264	266	266	264	267	266	267	268	268	266	266	265	265	265	265	264	263	264	263	264	263	263	263	264
11	284	286	284	275	279	277	273	275	272	274	271	268	265	268	260	264	262	268	263	263	265	259	255	263	263	277	262	269	261	267	266	265	269	269	270	270	268	264	270	272	269	272	271	271	270	270	270	269	268
12	313	314	318	317	317	315	300	314	307	302	303	299	297	291	284	277	276	276	274	273	272	273	274	270	270	271	276	274	275	274	276	280	274	273	272	272	274	272	272	272	273	274	272	272	271	275	274	272	272
13	294	292	291	293	293	289	286	285	291	285	288	288	286	290	286	290	284	286	280	282	280	277	280	279	274	276	279	282	283	282	284	285	286	286	290	291	290	293	295	293	291	289	289	287	290	290	290	287	286
14	287	285	285	282	280	279	277	278	278	280	272	275	274	272	274	271	272	274	272	271	270	270	268	268	267	266	268	269	271	269	271	269	271	271	270	269	269	269	270	270	271	269	269	272	272	272	273	275	275
15	282	286	282	283	306	289	278	296	283	273	274	275	275	271	279	275	275	273	273	269	270	272	269	265	268	265	269	269	269	269	268	266	267	268	269	268	270	271	268	268	269	268	269	267	268	272	270	269	266
16	297	295	296	295	293	292	289	287	287	286	284	284	282	281	280	277	277	277	276	275	274	276	278	278	279	282	286	290	290	294	298	300	303	307	311	311	315	318	321	325	316	316	318	320	320	322	322	329	329
17	305	304	303	298	295	292	289	290	286	285	282	280	276	273	274	271	274	274	274	272	271	273	273	273	273	275	278	278	279	281	283	284	285	284	286	284	283	283	282	279	277	279	281	280	282	284	284	285	287
18	307	308	305	301	300	300	300	300	300	302	299	296	296	295	286	282	285	287	283	283	281	281	281	283	281	283	284	287	286	287	288	290	290	292	290	290	296	291	289	286	285	285	282	285	285	285	283	282	280
19	271	269	269	268	267	267	267	266	264	265	263	264	262	261	260	259	259	259	258	258	257	257	261	264	264	265	271	264	263	264	261	261	260	259	260	260	259	259	258	258	259	257	257	257	258	259	258	258	257
20	298	299	300	304	301	302	302	301	300	299	299	298	293	291	292	290	295	298	298	299	299	299	297	294	298	297	298	299	295	292	287	285	284	285	285	286	289	289	289	289	286	288	287	287	287	291	292	288	290
21	271	273	272	272	272	271	270	268	267	269	268	267	266	265	262	262	259	260	260	259	258	259	260	259	258	258	261	260	260	262	261	263	262	261	262	263	262	260	261	261	261	262	261	261	260	261	261	261	259
23	289	290	289	285	284	286	283	282	276	277	272	273	271	273	277	273	277	275	273	272	271	275	276	275	272	274	280	278	278	277	278	276	275	276	278	276	271	271	271	271	268	268	269	269	268	268	269	270	270
24	277	279	282	279	276	277	277	274	274	275	268	272	268	270	269	266	266	267	267	265	266	266	267	265	267	268	272	270	268	272	270	270	268	266	267	267	266	266	264	264	263	262	262	262	263	263	262	263	263
25	275	274	273	273	270	270	269	268	268	267	264	265	265	266	264	262	260	262	260	261	260	260	258	257	258	259	263	262	261	262	263	262	264	264	262	262	261	260	260	260	261	259	258	259	257	258	258	258	259
26	277	274	278	275	272	272	269	268	269	266	266	268	266	269	267	266	263	266	264	263	261	263	261	263	262	260	263	263	264	263	264	264	264	265	264	263	264	264	263	264	263	262	261	261	261	263	262	263	262
27	282	284	281	280	279	281	278	277	278	278	278	278	277	277	274	273	269	271	270	268	267	267	266	266	266	266	267	269	270	268	267	267	267	268	266	267	268	266	266	267	266	263	262	263	261	262	262	263	265
28	285	289	288	287	287	287	284	282	284	281	279	280	277	276	275	272	268	267	265	264	262	262	262	262	261	263	265	264	264	264	267	267	266	268	270	271	271	273	271	273	270	269	266	262	261	261	260	262	262
29	278	279	279	281	275	276	270	270	272	274	272	273	271	270	269	267	267	268	266	266	265	266	264	263	264	264	266	265	266	265	267	267	267	269	267	269	268	269	269	268	267	265	263	263	264	264	262	260	261
31	277	277	281	279	277	278	277	274	273	276	269	270	266	268	267	265	266	267	267	265	267	267	267	265	267	268	273	270	268	273	271	270	268	266	267	267	266	266	264	264	264	263	263	263	264	263	264	263	263
32	281	282	278	278	276	275	270	267	270	272	268	274	275	277	275	274	274	275	272	274	275	274	276	277	275	275	278	278	277	276	275	276	273	275	274	273	274	271	267	269	268	267	265	265	261	264	264	262	263
34	293	292	291	289	289	281	282	281	283	282	279	279	278	278	276	274	275	275	274	272	273	271	271	273	271	270	273	272	273	273	273	272	275	275	274	276	270	273	270	270	268	266	265	265	265	263	264	263	265
35	278	280	282	282	281	281	282	279	278	276	273	272	270	269	266	265	262	263	262	262	261	261	262	261	263	262	266	266	266	267	269	270	270	270	269	266	266	266	266	265	265	264	265	263	265	265	265	265	264
37	274	274	276	277	275	274	274	274	275	274	274	277	274	278	274	274	274	274	273	272	269	270	271	269	268	269	272	274	274	271	270	271	270	270	269	268	268	269	268	268	268	269	268	269	268	267	267	266	264
40	292	294	293	291	289	290	286	288	286	286	282	282	281	279	277	275	273	277	274	274	272	273	272	272	271	271	273	274	272	273	273	272	273	272	271	272	271	271	270	270	269	270	271	269	270	269	269	269	270
42	297	297	298	300	292	292	295	290	287	290	285	283	280	282	280	278	275	276	276	276	275	275	275	276	278	279	283	284	282	282	281	279	277	277	275	276	274	273	273	272	272	271	271	270	270	271	271	271	270
44	293	291	293	294	292	292	287	287	286	287	289	286	285	287	283	281	279	280	277	276	273	272	273	272	271	270	274	273	273	274	275	276	274	275	275	273	270	272	269	271	270	269	269	267	268	268	269	269	268
45	280	283	281	281	276	279	278	274	275	274	269	269	267	262	257	264	257	263	261	258	261	259	263	261	260	262	264	264	266	264	266	266	266	269	268	264	266	268	266	266	264	262	259	261	265	263	260	264	262
47	283	283	288	287	285	284	282	282	281	278	279	279	277	276	273	271	270	271	268	268	266	266	266	267	269	269	272	273	274	275	274	272	270	269	268	267	266	267	267	265	266	266	264	265	265	265	265	265	266
48	287	287	289	287	286	290	286	282	278	278	272	270	268	269	270	269	270	271	270	269	268	268	270	272	270	271	270	272	270	270	272	271	269	272	272	272	274	273	272	269	269	268	268	266	268	267	265	265	266
49	288	289	290	286	287	286	285	286	286	280	279	279	273	274	273	267	267	268	265	266	266	266	267	265	266	265	268	267	267	268	268	268	268	270	270	268	267	268	265	267	265	265	263	263	265	264	264	263	264
50	284	285	288	286	284	283	281	282	281	281	282	280	278	278	275	271	271	272	269	268	266	266	265	265	263	262	265	263	265	265	267	264	265	267	268	268	265	266	264	263	263	263	262	263	263	264	264	265	266
1	272	275	275	271	270	271	267	267	267	266	266	267	263	265	261	260	259	262	261	260	259	259	261	259	259	258	263	263	263	265	261	264	263	263	261	262	261	261	262	263	265	263	261	261	260	260	259	259	259
2	270	270	270	269	268	267	266	265	267	267	264	266	264	266	264	262	261	262	262	260	260	260	261	260	260	260	262	263	263	263	262	264	265	266	263	265	264	265	264	264	264	264	263	264	264	264	263	264	263
3	284	280	278	278	280	277	277	275	278	279	279	281	277	278	277	276	275	278	275	274	272	271	270	270	270	269	272	270	268	268	267	267	266	264	265	264	264	264	265	262	264	265	265	266	266	266	267	267	267
4	276	275	275	275	274	271	271	270	268	268	267	267	266	268	266	265	263	264	261	261	259	258	258	257	258	257	259	258	258	257	258	259	257	258	259	259	259	260	259	258	258	258	259	257	256	257	257	258	258
5	274	275	275	276	274	274	269	268	267	261	261	264	262	263	262	261	261	263	263	263	264	264	265	267	266	270	274	273	275	275	273	275	275	274	271	271	268	269	264	264	263	260	261	259	257	257	256	257	258
6	280	283	277	281	278	273	275	278	275	276	271	274	271	270	268	266	267	268	266	265	265	265	263	263	262	261	265	266	267	267	264	269	272	270	272	270	265	270	267	267	266	263	264	263	264	263	260	265	261
8	295	291	295	291	284	284	283	282	280	282	279	283	277	280	280	273	276	276	273	272	271	269	269	265	270	267	269	268	268	268	268	269	268	272	269	267	264	264	264	266	265	267	265	266	264	264	264	263	264
9	291	294	290	289	289	287	281	284	284	282	277	276	272	272	270	268	264	266	264	265	266	265	264	265	264	266	269	269	272	272	275	272	266	267	264	265	266	262	264	262	263	263	263	263	261	263	261	263	261
10	274	278	278	275	273	272	269	269	265	262	260	260	258	259	258	258	258	258	259	258	255	253	253	251	255	256	258	256	258	258	257	257	258	256	256	259	258	257	258	258	257	256	257	257	259	257	258	257	259
11	260	261	262	262	260	261	260	260	259	255	252	253	254	254	252	252	251	254	251	251	251	250	251	250	250	250	252	252	253	252	252	252	253	252	253	254	252	254	252	252	251	251	250	250	250	250	250	251	251
12	263	263	262	262	263	263	262	261	263	263	263	266	265	265	264	263	263	265	263	259	257	257	255	253	253	254	257	256	257	258	259	258	258	257	257	257	256	257	255	256	256	256	256	258	257	257	257	258	259
13	293	289	286	285	275	284	277	273	279	278	270	273	265	270	266	265	266	267	264	262	261	263	263	265	266	269	272	275	279	273	278	270	275	267	267	268	270	265	264	264	262	262	264	264	265	267	263	265	263
14	297	296	299	295	294	291	291	290	287	286	281	280	277	276	274	273	270	271	271	269	271	271	272	267	267	265	268	269	270	270	269	268	265	263	263	261	262	259	258	258	259	258	258	257	259	259	259	260	260
15	295	291	289	286	280	278	277	275	274	273	270	272	269	269	269	270	267	270	268	264	268	268	270	269	269	271	276	277	276	272	272	273	275	274	273	274	272	273	273	273	272	272	272	273	272	271	271	272	274
16	265	264	265	263	261	260	260	259	259	259	258	258	258	258	258	256	256	257	255	255	253	255	254	253	252	253	256	258	258	259	259	260	260	259	258	257	256	256	256	257	256	255	255	256	256	255	256	256	256
17	268	269	271	270	267	267	266	267	268	266	267	269	268	268	267	265	264	268	266	265	264	265	265	266	265	265	267	267	267	264	264	265	264	262	262	262	260	260	260	261	260	260	259	258	258	258	258	257	257
18	268	269	268	268	268	268	270	271	268	268	267	268	264	266	264	263	265	267	264	262	260	261	259	259	259	257	261	259	258	257	258	259	260	260	261	262	261	260	261	260	260	259	259	258	258	258	259	257	259
19	284	284	285	283	282	279	278	275	274	275	273	273	269	270	268	268	267	265	266	266	265	266	263	263	262	266	268	267	269	267	269	269	269	269	266	266	265	264	264	263	261	264	263	264	265	263	263	263	262
20	276	277	279	278	275	274	273	273	272	271	270	273	269	270	267	265	264	265	263	262	261	260	259	260	259	257	260	258	259	257	257	256	256	256	257	256	257	256	256	255	256	256	257	258	257	257	257	257	257
21	278	278	274	272	270	269	268	265	264	264	264	264	262	263	264	262	262	263	263	261	262	263	264	264	266	264	269	268	266	266	267	267	267	269	266	266	266	265	265	265	266	265	265	266	266	266	266	266	267
22	292	295	296	293	289	287	284	286	290	289	289	289	285	284	283	285	282	284	282	282	281	285	286	288	289	293	295	295	293	289	292	293	290	290	289	289	285	283	282	286	287	287	285	284	283	279	286	282	281
23	287	287	286	283	280	279	279	279	278	277	275	276	275	276	275	274	274	273	275	275	273	273	271	272	270	271	275	274	274	275	275	270	273	270	272	272	270	271	270	271	271	271	271	272	273	272	273	277	276
24	288	284	283	281	277	278	277	274	274	272	269	270	268	269	267	266	264	262	261	261	260	261	260	259	261	260	263	262	262	261	260	260	261	260	260	262	260	261	260	259	260	259	259	259	261	260	258	259	258
26	280	284	283	282	279	277	276	275	272	271	268	269	265	266	264	263	261	261	260	260	261	261	260	260	261	262	264	264	264	265	263	263	264	263	262	263	263	262	261	263	262	260	260	260	259	261	262	262	263
27	298	298	296	294	285	280	281	282	279	280	280	279	280	279	277	276	276	275	276	273	273	269	267	270	267	269	269	267	266	265	265	266	264	264	264	264	266	264	266	264	264	264	264	265	264	266	265	264	263
30	296	300	305	304	305	298	294	292	286	281	279	277	275	276	272	270	269	271	270	270	270	271	271	272	272	274	275	272	272	272	274	273	275	277	277	277	276	274	274	273	272	271	271	269	269	269	269	269	269
32	291	287	289	286	283	283	282	282	282	283	280	279	278	277	274	273	273	273	272	272	270	273	272	273	272	274	276	275	275	275	276	275	277	285	277	283	276	274	274	274	272	271	272	273	272	271	270	272	271
35	279	282	280	281	278	277	276	275	275	274	271	271	271	271	269	268	268	269	266	266	266	266	266	266	265	265	267	267	267	267	266	267	268	267	265	268	265	265	264	265	264	264	263	264	264	264	264	265	265
Raw Data of Experiment 2
Cell ID	F_1	F_2	F_3	F_4	F_5	F_6	F_7	F_8	F_9	F_10	F_11	F_12	F_13	F_14	F_15	F_16	F_17	F_18	F_19	F_20	F_21	F_22	F_23	F_24	F_25	F_26	F_27	F_28	F_29	F_30	F_31	F_32	F_33	F_34	F_35	F_36	F_37	F_38	F_39	F_40	F_41	F_42	F_43	F_44	F_45	F_46	F_47	F_48	F_49
1	296	296	297	301	305	308	310	309	310	309	310	308	309	308	309	312	313	310	309	304	304	305	302	302	302	301	302	299	298	295	292	289	287	288	288	285	283	287	281	280	282	279	279	280	282	282	283	284	286
2	271	271	274	275	279	278	281	283	284	284	282	285	286	286	289	291	291	286	281	277	277	276	277	275	276	276	275	275	274	280	286	291	294	294	293	290	291	295	292	273	275	280	290	285	282	281	279	278	279
3	288	292	295	296	299	299	302	301	301	298	289	284	282	280	278	281	283	280	281	281	282	286	287	290	295	303	307	311	312	316	315	309	297	292	288	286	285	287	286	285	285	286	287	287	288	289	291	291	294
4	286	293	294	298	307	310	315	319	316	313	314	307	302	304	298	293	293	287	288	285	286	283	284	286	287	287	290	290	292	295	301	306	311	316	322	325	325	329	328	324	315	307	301	300	296	295	293	294	296
7	306	308	314	316	324	332	329	326	324	325	320	318	317	312	311	313	311	305	303	299	296	300	296	291	291	292	294	300	301	307	309	314	313	315	315	314	314	316	314	307	303	299	297	292	292	291	292	292	293
9	291	292	298	300	302	308	310	309	311	310	309	309	308	307	307	304	299	291	291	287	285	285	289	286	284	285	283	281	282	284	287	285	286	287	287	289	285	288	290	290	287	285	284	284	284	281	281	283	282
10	290	295	296	298	298	302	302	302	304	306	303	297	298	296	291	291	286	283	279	276	279	281	283	284	282	285	284	282	285	289	291	289	292	292	292	294	295	294	292	290	288	283	282	281	280	278	278	278	278
11	286	293	294	299	309	310	314	318	315	312	313	307	302	304	298	293	293	287	287	283	285	286	287	286	287	287	290	290	292	295	301	306	311	316	322	325	325	329	329	324	315	307	301	300	296	295	293	294	297
14	301	303	304	304	306	306	309	310	308	306	307	306	303	308	307	304	302	298	295	293	294	294	294	293	295	301	297	300	300	299	302	307	310	308	307	319	325	328	327	322	314	303	298	295	291	292	293	292	294
15	323	315	319	322	324	326	323	321	322	326	313	315	305	308	308	308	310	302	301	294	296	293	294	289	293	290	289	289	293	293	293	295	292	294	290	292	297	304	301	305	307	301	297	292	288	284	291	288	288
19	279	280	282	284	284	287	290	288	289	289	288	288	287	288	289	289	288	285	284	281	280	281	280	280	279	280	281	280	280	280	281	282	282	283	283	283	284	286	285	287	288	290	290	290	291	290	291	292	291
20	277	278	281	283	285	286	287	287	288	288	288	286	286	290	290	293	290	287	285	286	284	284	286	285	285	286	288	288	292	290	290	292	292	292	293	292	291	291	289	290	288	287	284	283	282	281	280	280	281
22	295	296	299	300	304	304	308	307	307	307	310	305	302	300	299	294	297	293	292	289	294	295	295	301	304	309	310	314	318	318	322	322	320	319	321	311	309	306	303	303	302	300	302	306	303	303	305	307	311
24	291	292	293	296	299	299	300	299	302	300	296	293	290	292	295	297	297	292	290	286	288	286	286	289	293	297	302	303	307	309	319	317	319	318	312	312	299	299	298	293	291	293	297	296	290	288	289	289	295
25	274	275	277	281	282	280	288	290	289	291	290	294	293	292	294	293	296	290	287	282	281	282	279	278	276	278	276	276	276	276	277	278	277	278	280	282	284	285	284	282	289	293	298	296	298	293	289	285	281
28	290	293	298	304	308	309	309	307	307	303	296	293	286	283	285	285	285	281	282	286	286	290	294	301	307	313	318	329	334	347	351	360	358	361	360	341	326	308	296	292	286	283	285	282	281	284	284	283	283
29	295	294	297	298	303	302	304	308	309	306	304	303	300	303	306	305	302	301	298	295	294	291	288	289	291	290	289	288	289	288	291	287	291	295	295	297	300	303	307	305	301	302	296	291	291	287	285	283	282
30	297	303	304	305	308	315	316	312	315	322	315	318	317	320	322	319	319	314	310	305	310	305	300	296	293	294	292	290	291	289	294	294	294	296	298	301	301	307	311	312	307	316	314	314	311	309	309	311	311
31	282	287	290	290	292	294	295	297	301	299	298	296	296	296	296	296	295	294	288	285	285	283	283	284	282	284	285	284	283	285	287	288	287	286	285	288	286	286	288	288	287	287	286	284	285	283	284	282	283
32	276	277	278	278	279	281	283	284	285	288	286	286	289	291	292	298	296	294	293	291	288	288	286	282	281	281	278	276	275	275	277	277	276	277	278	278	278	278	278	279	280	280	280	279	279	279	279	277	277
34	278	281	282	287	291	290	291	290	291	294	293	289	292	295	295	296	295	291	286	283	280	279	276	277	276	279	277	277	278	280	282	285	288	291	290	293	295	294	290	287	285	283	281	282	281	280	279	279	279
36	320	319	323	327	325	324	331	327	324	322	317	318	321	324	319	318	311	310	306	308	308	309	306	304	303	304	307	309	313	313	318	323	329	326	321	314	306	300	296	293	296	298	299	298	297	295	296	296	297
37	281	281	282	284	286	284	285	285	287	287	286	287	288	288	291	292	295	292	288	287	289	288	289	287	287	286	286	284	284	285	285	285	284	284	284	283	284	286	286	285	287	287	289	289	290	290	289	289	289
38	284	287	290	290	291	291	291	293	294	293	293	290	292	290	289	291	290	286	285	285	284	285	285	286	286	290	290	290	294	299	302	305	310	312	312	316	317	322	315	312	307	306	303	302	299	298	294	291	287
39	288	286	290	291	293	290	292	291	291	296	299	295	296	297	300	300	298	295	293	290	288	288	289	287	287	286	285	284	287	288	291	293	293	299	301	301	300	299	299	301	301	300	301	302	306	301	300	299	298
40	282	282	286	289	292	291	292	293	293	293	291	291	288	287	288	289	290	286	286	282	286	287	288	288	291	292	293	297	294	299	301	300	303	301	301	299	299	296	297	295	292	292	291	288	288	288	289	291	290
5	320	316	316	319	316	313	319	312	319	316	313	309	316	311	317	319	317	313	311	306	307	307	303	303	300	301	301	297	298	295	291	293	290	290	293	293	294	293	292	292	295	294	290	291	296	297	297	298	296
8	279	280	281	282	285	285	286	285	285	287	286	287	288	287	290	293	294	290	287	285	285	283	283	283	281	283	283	283	282	281	282	283	283	284	284	284	283	283	282	282	281	282	281	280	280	279	279	278	279
16	269	271	271	271	271	271	270	271	272	272	271	271	271	272	274	276	276	274	273	273	274	276	277	277	277	279	279	277	277	277	277	277	276	276	276	276	275	276	275	275	275	273	273	273	273	272	273	273	272
17	294	297	297	299	302	299	302	304	305	309	312	310	315	320	323	335	339	326	332	335	337	339	344	343	341	346	346	334	338	333	328	330	323	317	311	300	294	291	291	289	287	287	288	286	285	288	287	286	285
23	300	298	302	304	305	304	305	305	306	307	303	300	305	302	307	309	306	302	306	309	304	306	304	300	296	295	290	290	286	287	286	287	288	289	285	285	287	287	283	283	284	286	285	286	285	285	286	287	287
33	286	287	288	291	289	297	296	293	296	295	296	295	295	292	294	297	298	289	289	288	290	289	285	285	286	287	287	285	283	284	284	284	283	283	282	282	284	284	283	282	283	283	282	280	280	280	278	279	279
35	290	292	292	295	298	298	296	298	298	294	303	299	296	299	299	298	296	291	291	288	286	279	281	282	284	284	286	285	288	285	286	284	285	284	283	282	282	283	284	283	283	282	283	282	281	281	281	279	280
2	298	298	303	308	308	308	313	312	311	308	307	312	310	311	320	321	318	323	318	319	319	319	317	320	324	325	325	319	321	321	317	320	317	316	311	307	305	305	303	306	307	301	300	298	300	299	303	303	307
3	281	280	280	281	281	284	285	285	288	285	285	284	283	286	290	290	288	284	283	281	282	279	277	277	278	280	283	285	285	286	287	288	289	289	289	291	289	289	290	289	288	287	284	282	283	284	284	283	284
5	272	277	280	280	280	281	283	282	282	283	282	282	281	281	282	279	278	273	272	272	272	272	272	272	272	274	276	277	278	280	283	286	285	285	285	283	280	277	276	274	275	275	273	273	274	273	273	274	273
6	282	283	290	288	290	293	294	296	301	294	295	291	295	296	300	301	308	303	300	298	294	302	295	294	297	297	298	292	291	290	295	293	289	289	287	290	287	286	288	286	288	287	287	286	287	289	290	292	291
7	278	278	280	281	281	283	285	288	288	287	289	291	292	297	302	300	297	296	292	290	289	283	283	284	284	290	286	284	286	285	285	288	292	293	296	292	298	295	295	293	294	294	293	292	289	287	287	288	287
12	271	274	274	278	277	281	282	281	280	280	279	277	274	273	276	278	276	275	273	273	273	274	273	273	273	274	275	274	278	274	273	274	275	276	275	276	275	275	275	275	275	275	274	273	273	273	273	273	272
13	280	282	289	291	292	296	296	294	294	292	290	283	275	279	282	280	278	278	277	274	274	276	277	280	281	285	290	295	294	292	294	290	285	281	278	277	276	276	275	275	276	277	277	277	277	279	281	281	283
14	274	273	277	276	282	283	288	290	282	282	282	280	282	283	284	284	282	282	280	275	278	281	283	281	278	277	277	280	279	281	279	282	281	282	288	283	285	284	289	288	289	290	290	289	289	288	286	290	290
15	284	284	286	288	289	288	289	290	292	291	291	294	296	299	298	299	302	299	299	299	298	297	295	293	293	289	292	286	284	282	286	284	282	282	283	288	291	294	295	299	304	304	309	313	313	313	316	316	316
16	272	274	277	281	284	285	288	288	287	287	287	285	284	285	284	284	281	279	275	273	272	271	271	271	271	272	273	272	271	272	272	273	274	275	274	274	274	274	276	275	275	274	274	272	270	271	270	270	269
17	272	274	278	279	282	283	286	286	287	284	282	278	275	273	274	273	273	270	269	269	270	271	273	273	275	278	281	282	285	289	293	295	296	295	293	288	282	278	276	276	275	275	276	275	276	276	277	278	280
18	293	296	299	300	306	306	306	309	307	312	310	309	312	310	313	311	311	309	303	297	298	297	296	291	292	296	294	296	296	297	293	298	299	300	296	295	296	298	300	303	302	303	298	297	295	292	288	287	287
20	265	266	268	267	270	269	271	271	271	271	270	272	271	273	275	275	274	268	267	265	265	266	267	268	267	269	271	270	271	277	281	284	286	289	290	292	293	295	294	291	289	285	281	276	272	270	270	269	268
22	279	279	280	281	286	289	291	289	290	288	284	283	281	280	282	281	282	279	278	277	280	281	283	283	283	287	292	293	294	295	298	296	292	291	286	286	285	284	285	285	286	287	285	283	280	281	282	283	285
23	270	273	278	277	280	281	284	284	289	288	291	291	290	297	299	298	298	297	300	299	298	296	300	292	292	290	289	288	283	284	281	279	280	280	283	282	285	287	286	290	286	287	289	291	292	292	290	289	290
24	274	275	278	278	279	283	283	284	286	283	285	283	283	283	285	286	284	281	278	277	275	274	274	273	272	272	274	273	274	275	275	277	278	280	281	284	284	287	287	285	284	283	280	279	278	277	277	278	278
26	266	267	266	266	266	268	270	270	270	270	272	274	274	278	278	285	290	286	289	292	289	291	294	296	297	300	302	306	308	314	315	316	315	316	317	315	315	317	315	312	314	313	309	307	305	303	302	300	296
27	268	267	266	268	269	272	275	273	272	270	268	266	267	269	271	272	272	269	267	267	267	269	269	270	269	272	273	270	269	268	269	272	274	276	276	275	275	275	275	274	274	273	272	271	270	270	270	271	271
28	289	286	300	308	306	309	309	312	312	310	313	306	302	302	300	299	297	287	286	286	288	286	288	286	287	290	294	290	289	297	301	303	304	305	300	297	290	285	282	282	281	282	283	282	281	282	281	281	282
29	280	283	289	291	297	300	302	301	302	303	304	301	299	297	299	295	298	290	297	294	291	289	289	284	285	290	292	295	295	296	302	306	310	313	308	302	310	314	301	294	290	291	288	287	288	287	287	284	286
32	290	288	291	287	292	294	294	295	295	299	298	302	300	301	302	305	304	295	293	288	290	291	289	289	290	292	298	298	298	299	303	311	317	321	321	323	322	324	325	327	329	326	323	319	317	313	311	309	305
33	286	287	290	290	293	296	296	299	298	299	295	294	294	293	292	292	293	288	288	286	287	294	293	292	291	292	291	295	292	292	296	302	307	306	305	302	298	300	295	293	291	288	291	289	289	288	287	287	287
34	289	291	290	293	295	298	299	301	307	311	316	318	318	312	314	313	308	307	304	302	306	303	301	301	301	306	303	302	306	308	314	318	313	324	326	320	321	319	316	315	306	304	303	304	302	300	297	301	297
35	288	292	298	299	298	301	304	308	313	306	311	310	303	303	301	304	305	298	302	295	299	295	301	303	305	306	308	301	310	307	309	306	312	310	324	312	310	308	300	306	296	300	298	298	296	299	296	298	295
36	275	278	283	292	291	299	303	309	311	312	307	317	311	307	313	315	315	309	302	295	291	294	294	300	294	288	288	291	290	293	294	293	301	297	296	299	301	303	308	305	307	303	295	291	291	288	287	289	284
37	284	293	299	303	305	303	307	311	315	314	317	313	312	318	316	316	310	308	308	301	301	300	292	291	288	293	290	289	289	291	293	294	295	298	301	300	301	305	306	310	307	303	298	296	294	289	291	290	290
38	285	290	293	299	302	306	307	310	312	314	312	313	310	314	313	309	307	300	297	294	292	290	288	287	286	289	291	290	293	293	295	299	305	302	307	311	310	306	299	295	294	290	292	290	289	286	291	289	288
39	284	285	292	293	296	299	302	299	298	300	298	299	299	302	302	297	298	292	289	283	281	280	281	284	284	286	287	284	286	289	290	292	299	302	300	304	303	301	297	294	289	290	289	288	284	285	285	286	284
4	280	281	285	289	292	294	295	296	298	301	302	301	299	298	301	302	301	299	298	298	302	308	308	310	314	318	322	318	315	311	310	304	299	291	286	284	282	282	281	279	283	282	281	281	283	282	282	282	282
8	268	269	271	272	272	274	275	276	277	278	281	284	285	291	295	299	301	301	300	301	302	303	304	312	307	309	306	305	299	294	293	291	288	286	282	279	277	276	275	273	273	273	273	272	271	271	271	271	271
9	275	274	276	275	275	275	275	276	275	274	276	275	277	279	282	281	283	278	279	277	279	278	277	277	277	278	279	277	278	277	278	278	277	277	277	276	274	276	276	276	275	275	274	275	276	275	275	276	275
11	277	276	279	280	278	279	279	278	278	279	280	278	279	281	283	287	286	283	283	283	284	285	284	282	283	284	286	282	285	288	288	288	289	289	289	286	283	286	286	285	285	285	281	281	281	280	278	278	277
21	295	295	298	299	306	306	313	306	310	315	318	312	305	309	309	314	316	307	305	300	300	297	298	297	296	297	298	296	296	293	295	295	295	294	294	295	293	294	295	295	295	292	294	294	293	291	290	289	289
31	290	291	290	292	296	299	302	301	302	301	299	301	302	306	310	305	305	304	296	303	302	305	304	303	305	304	302	304	303	299	298	297	295	292	290	291	290	283	281	284	283	284	284	284	285	284	285	283	286
2	269	269	270	271	274	272	275	278	280	281	283	286	286	286	290	290	288	285	280	278	274	273	272	272	272	273	273	271	275	274	274	276	277	280	283	283	286	291	293	294	296	294	293	293	292	288	288	289	288
3	274	277	283	284	287	287	288	291	289	290	287	286	283	281	279	277	276	271	269	268	267	268	268	269	270	271	270	271	270	271	274	275	276	277	279	280	280	281	282	283	283	287	283	281	280	279	276	274	273
4	270	270	272	274	274	275	276	277	275	277	275	276	277	278	279	280	278	275	273	270	270	270	271	271	271	271	271	271	272	273	275	277	278	279	278	279	281	281	282	281	279	277	275	274	274	274	274	275	274
5	265	267	269	269	270	273	277	278	278	275	275	275	273	273	273	273	270	267	267	266	266	266	267	268	267	268	269	269	269	268	268	271	271	272	274	272	272	274	274	275	273	272	270	271	269	270	271	270	271
7	274	276	276	278	280	280	279	281	281	280	282	283	281	284	286	286	287	285	286	284	284	285	286	288	287	287	288	286	288	287	286	287	285	283	282	280	278	277	276	274	274	271	272	271	270	270	271	270	270
8	276	278	284	285	286	287	286	287	289	289	288	283	286	286	284	291	287	282	281	277	282	282	279	280	280	282	279	278	282	286	281	291	293	291	289	291	291	288	286	286	286	289	285	285	282	283	284	284	285
9	285	289	295	299	300	302	307	307	303	307	304	301	299	299	297	293	285	286	283	283	284	287	287	289	289	300	295	299	301	305	311	315	321	319	321	314	312	307	297	291	288	290	293	291	290	289	287	286	286
10	280	282	285	288	286	291	293	294	291	291	291	290	290	291	289	292	289	286	282	278	279	278	278	274	276	276	276	275	275	276	280	283	283	282	286	291	292	292	293	290	283	280	277	276	276	276	276	277	277
11	287	286	288	294	297	295	297	299	295	295	293	289	288	288	287	289	290	284	285	283	282	284	282	285	289	294	296	295	301	302	302	298	296	294	291	291	289	288	285	290	291	294	292	292	292	294	296	297	298
13	276	280	284	284	285	283	285	288	288	288	287	285	283	285	285	284	284	281	278	277	278	277	279	281	281	282	282	281	281	284	284	287	289	289	290	292	293	293	294	294	291	289	287	286	284	285	284	283	283
14	275	277	277	278	280	282	279	286	281	284	287	287	285	282	281	281	278	275	275	274	274	273	276	278	279	277	280	279	278	283	286	285	283	285	288	295	286	291	290	288	289	286	285	280	279	278	278	280	280
15	278	276	280	282	283	282	285	288	287	285	287	287	285	286	289	291	290	284	282	281	280	281	278	279	280	282	285	286	288	292	295	299	299	304	301	301	299	296	293	289	285	282	281	280	281	279	279	279	279
16	277	279	281	283	286	285	288	288	288	288	287	284	281	281	281	281	277	274	273	272	275	275	275	276	276	277	278	280	284	289	293	299	301	303	310	312	311	305	299	291	285	285	281	280	280	279	279	279	279
17	280	285	288	291	293	292	294	294	297	298	295	292	294	296	295	296	295	295	287	283	282	282	285	282	283	283	283	281	279	280	281	281	284	284	288	293	291	296	293	295	297	296	293	290	285	283	281	282	281
19	300	305	310	316	319	318	313	311	310	303	297	292	285	284	288	289	288	289	289	287	291	289	291	294	296	296	299	302	303	305	305	306	307	306	308	306	301	302	302	301	298	298	298	298	300	301	303	299	302
22	285	287	287	288	288	286	287	285	284	284	284	280	280	280	283	284	285	283	282	282	282	283	283	284	285	286	287	286	288	287	287	288	287	288	290	293	295	296	299	300	300	302	303	306	303	309	308	308	311
23	296	297	302	305	309	312	316	316	319	322	322	328	329	329	328	320	320	310	307	296	295	299	299	300	294	296	293	294	299	302	301	307	305	307	313	314	317	314	305	299	294	292	287	290	288	285	287	288	289
24	293	294	302	302	308	308	315	316	316	315	316	312	310	313	312	312	307	301	293	288	284	285	282	278	278	281	280	281	284	286	289	292	295	300	303	304	306	307	310	306	304	298	289	286	283	280	279	278	281
26	292	291	293	298	298	297	301	302	303	302	303	302	300	305	306	308	309	304	303	305	302	301	298	297	292	291	290	288	288	288	291	292	293	293	291	293	291	290	291	295	298	301	304	306	307	304	302	299	298
27	286	288	293	293	301	302	306	302	304	304	301	305	302	303	306	306	303	302	296	296	293	290	294	294	294	292	296	303	307	311	310	315	318	325	326	332	328	326	325	322	315	314	302	301	296	292	294	294	293
28	297	298	297	302	305	305	309	307	308	306	307	300	296	292	291	291	292	294	289	289	290	288	286	288	285	289	290	291	291	295	298	298	300	298	299	299	301	304	296	297	289	293	292	291	289	290	288	288	288
30	289	289	295	293	299	304	300	305	299	305	310	306	303	300	306	306	302	301	292	287	292	291	298	302	302	302	303	302	311	309	309	307	308	307	299	303	296	300	303	298	295	294	289	290	293	289	287	295	294
31	283	284	288	289	292	292	294	297	297	297	293	287	289	286	286	285	281	280	279	277	279	279	280	281	280	281	281	280	281	282	283	284	285	285	284	285	284	283	282	281	281	279	279	280	280	278	279	280	280
32	276	276	279	282	284	283	280	284	286	289	287	285	288	286	289	288	290	286	283	281	282	280	279	282	277	277	278	281	277	277	278	279	280	280	279	280	282	283	284	286	288	288	290	291	290	290	291	291	291
35	285	288	294	297	299	302	306	305	307	305	305	308	305	306	303	303	303	299	295	292	295	302	301	301	301	303	307	311	311	314	318	322	324	325	326	326	323	323	318	311	304	300	298	294	295	295	295	297	296
36	289	289	293	300	302	292	297	298	308	311	304	300	292	292	292	297	293	293	294	294	292	285	289	294	300	303	306	302	305	307	308	306	307	300	296	292	288	288	286	284	285	285	281	285	285	284	283	288	289
38	289	293	295	299	301	305	304	301	299	295	292	291	289	287	287	286	284	285	287	288	283	281	283	282	282	285	288	290	291	292	295	297	299	295	292	293	289	288	289	287	286	289	288	289	288	293	292	291	291
39	280	278	284	284	286	285	284	288	288	287	289	287	290	291	297	296	296	291	289	283	278	277	279	281	285	282	282	283	283	281	283	281	285	286	290	298	298	296	296	296	295	294	290	287	283	285	284	285	284
40	276	278	280	283	288	288	294	295	300	290	292	286	290	290	292	284	283	278	275	273	276	276	275	277	277	277	278	277	277	279	281	285	286	287	285	288	285	284	281	280	279	277	276	276	277	276	276	277	279
6	279	280	284	291	292	291	293	293	290	288	289	288	286	284	284	284	282	280	279	277	278	276	276	276	278	277	278	276	276	276	274	276	276	275	276	276	276	277	278	278	277	277	276	275	275	275	275	275	274
18	267	269	271	276	276	277	277	278	276	276	274	271	269	268	269	268	269	267	266	264	267	268	269	269	270	272	274	275	276	279	280	280	281	281	278	278	276	275	275	276	277	277	278	278	278	281	282	282	278
21	289	290	289	288	288	294	294	292	293	297	295	297	296	299	302	304	305	302	298	295	297	306	302	298	296	299	296	297	299	298	301	298	305	307	307	294	292	292	298	301	294	295	293	295	296	293	292	298	297
37	284	282	285	287	293	292	294	291	294	296	297	299	295	295	300	301	298	296	295	293	292	292	294	296	296	296	297	295	294	293	289	287	287	283	279	278	279	279	279	280	278	277	277	278	276	279	281	280	282
[truncated: 95 more columns]
